# Supplementary material for: Olive (Olea europaea) Leaf Extract Induces Apoptosis and Monocyte/Macrophage Differentiation in Human Chronic Myelogenous Leukemia K562 Cells: Insight into the Underlying Mechanism
Source: Oxid Med Cell Longev. 2014 Apr 6;2014:927619. doi: 10.1155/2014/927619 (PMC3997986; doi:10.1155/2014/927619)
Supplement: Supplementary file 1 — The Supplementary Material provides the Gene Ontology analysis (GO analysis) of the differentially expressed genes after treatment with 150 µg/mL of COLE (Chemlali Olive Leaf Extract). Genes with more than 1.5 fold change in expression levels between control and 150 µg/mL of COLE treated cells, were classified into categories according to the cell biological processes. Table S1 represents the results of GO analysis of the up-regulated genes. Table S2 represents the results of GO analysis of the down-regulated genes. [file 927619.f1.xlsx]

## Sheet: Table S1 (up-regulated)
Name	Type	Total Entities	Expanded # of Entities	Overlap	Percent Overlap	Overlapping Entities	p-value	Data Source	#
RNA splicing	Group	238	238	61	25	SNRPB2,WDR57,Ry1,CRNKL1,PRPF38B,RBM28,DHX35,C16orf33,SF3B5,PRPF38A,SFRS12IP1,MPHOSPH10,SFRS1,PUF60,MAGOH,HNRNPU,PPP2CA,HNRNPC,DDX20,PPP1R8,RNPS1,USP39,SFRS2,PNN,SRRM1,SMN2,NCBP1,SYNCRIP,EIF4A3,LSM7,PPIH,SFRS10,TFIP11,RBM39,SFRS5,PRPF4B,PRPF19,TXNL4B,SFRS4,IVNS1ABP,SFRS7,AQR,TARDBP,PPIE,PRPF40A,SMNDC1,SNRPD3,GEMIN5,PRPF4,LSM10,SF3B4,PPP4R2,PPAN,RSRC1,NHP2L1,LSM3,RBM8A,SNRPD1,GEMIN6,PHF5A,SNRPF	8.73803e-38	biological_process	1
mRNA processing	Group	277	277	65	23	SNRPB2,WDR57,Ry1,CRNKL1,PRPF38B,RBM28,PAPD1,DHX35,C16orf33,SF3B5,PRPF38A,SFRS12IP1,SFRS1,KHDRBS1,KIN,PUF60,MAGOH,HNRNPC,KHDRBS3,DDX20,PPP1R8,RBM23,SLBP,RNPS1,USP39,SFRS2,CLP1,PNN,SRRM1,SMN2,SYNCRIP,EIF4A3,LSM7,PPIH,RNGTT,SFRS10,TFIP11,RBM39,SFRS5,PRPF4B,PRPF19,TXNL4B,SFRS7,AQR,TARDBP,PPIE,PRPF40A,SMNDC1,SNRPD3,GEMIN5,RNMT,PRPF4,RBM25,LSM10,SF3B4,PPP4R2,CSTF2T,NHP2L1,LSM3,RBM8A,SNRPD1,GEMIN6,PHF5A…	1.18484e-37	biological_process	2
transcription	Group	2246	2246	170	7	MLLT3,ZNF35,ZNF195,ZNF232,ZNF592,ZBTB6,ECD,ZNF324,SAP30BP,DNTTIP2,ZNF639,PAF1,PAPD1,MYNN,PRDM10,ZNF557,ACTR5,ZNF614,BRMS1L,ZNF518B,ZNF551,ZNF766,ZNF670,GTF3C6,TADA1L,ZNF511,ZNF684,ZNF595,ZNF800,ZNF584,ZNF485,TWISTNB,ZNF283,ZNF713,RARA,EGR1,CTNNB1,NFKB1,NR4A2,WT1,SMAD1,TFDP1,NR2F2,BAZ1A,HNRNPAB,TCF3,MCM3,NAB2,TP53BP1,KHDRBS1,ZNF148,SOX4,CBX2,E4F1,CTCF,NFYA,SMARCB1,HELLS,UHRF1,MED23,IFI16,MED17,PRM…	3.08636e-27	biological_process	3
tRNA processing	Group	76	76	25	32	KIAA0391,POP7,RG9MTD1,FLJ20628,DUS3L,DUS1L,PUS7L,FDXACB1,TYW3,C16orf84,ELAC2,NSUN2,METTL1,TRMT6,TRNT1,TRMT11,MOCS3,LCMT2,RPP38,PUS7,TRMT1,POP4,RPP40,TSEN34,POP5	3.84468e-19	biological_process	4
rRNA processing	Group	114	114	29	25	WDR3,RRP1B,WDSOF1,UTP18,IMP4,FTSJ3,EXOSC6,UTP14A,MPHOSPH10,RPL35A,DDX56,DIS3,NOLC1,EXOSC3,EIF4A3,NOL5A,EBNA1BP2,RRP1,WDR36,UTP11L,TFB2M,EXOSC4,EMG1,RPS28,UTP15,POP4,POP5,EXOSC7,IMP3	1.60096e-18	biological_process	5
nuclear mRNA splicing, via spliceosome	Group	128	128	30	23	SNRPB2,WDR57,CRNKL1,SF3B5,SFRS1,HNRNPA0,MAGOH,HNRNPU,DHX9,HNRNPC,RNPS1,SFRS2,CLP1,SRRM1,LSM7,POLR2C,SFRS10,SFRS5,SFRS4,SFRS7,POLR2L,PRPF4,RBM25,SF3B4,POLR2F,POLR2K,NHP2L1,LSM3,RBM8A,PHF5A	5.00837e-18	biological_process	6
regulation of transcription, DNA-dependent	Group	2501	2501	156	6	MLLT3,ZNF35,ZNF195,ZNF232,ZNF592,ZBTB6,ECD,ZNF324,SAP30BP,DNTTIP2,ZNF639,PAF1,MYNN,PRDM10,ZNF557,ACTR5,ZNF614,BRMS1L,ZNF518B,ZNF551,ZNF766,ZNF670,TADA1L,ZNF511,ZNF684,ZNF595,ZNF800,ZNF584,ZNF485,ZNF283,ZNF713,RARA,EGR1,CTNNB1,FOS,NFKB1,NR4A2,WT1,SMAD1,TFDP1,NR2F2,BAZ1A,HNRNPAB,TCF3,MCM3,NAB2,TP53BP1,KHDRBS1,ZNF148,SOX4,CBX2,PRDM2,E4F1,CTCF,NFYA,SMARCB1,HELLS,UHRF1,MED23,IFI16,MED17,PRMT5,SNIP1,MC…	9.15727e-17	biological_process	7
DNA replication	Group	168	168	32	19	GINS1,GINS3,PCNA,CDC25A,FEN1,PHB,CDC6,MCM10,REV1,NUP98,MCM3,E4F1,RRM2,BLM,RPA1,KIN,MCM4,POLH,CLSPN,DNAJC2,MCM8,DSCC1,C10orf2,RBM14,DTL,GINS4,NOL8,RFC3,POLE2,POLQ,POLA2,MCM9	2.54185e-16	biological_process	8
ribosome biogenesis	Group	73	73	22	30	WDSOF1,MRTO4,BXDC2,TSR1,ISG20L2,IMP4,BYSL,SURF6,UTP14A,MPHOSPH10,DDX56,RRN3,NOL5A,NIP7,EBNA1BP2,RRS1,GTPBP4,C14orf169,EMG1,IPO4,NHP2L1,IMP3	4.30848e-16	biological_process	9
cell cycle	Group	539	539	58	10	SSSCA1,C21orf45,BIN3,FAM83D,PRR6,SPIN2B,CCND1,CHEK2,CCNE1,CDC25A,WT1,TFDP1,CDC6,FBXO5,MCM3,PMP22,GMNN,ATR,KHDRBS1,FANCI,BRMS1,ING1,E4F1,CTCF,SMARCB1,TP53BP2,HELLS,UHRF1,CCNE2,RINT1,MAD2L2,ANLN,GADD45GIP1,CLSPN,AVPI1,CDC23,RUVBL1,MIS12,CDC26,MCM8,SENP5,DSCC1,NOLC1,CDK2AP1,ANAPC13,BCCIP,CDCA5,E2F8,NPAT,TXNL4B,ZWILCH,PELO,TIPIN,C11orf82,LRRCC1,ESCO2,NCAPD3,ERCC6L	4.64388e-16	biological_process	10
DNA repair	Group	251	251	37	14	ASTE1,PCNA,PARP1,FEN1,FANCA,TOPBP1,RAD23B,MSH6,REV1,UNG,TP53BP1,ATR,FANCI,FANCM,HUS1,RAD18,RECQL4,BLM,RPA1,KIN,UHRF1,POLH,CLSPN,UBE2N,GTF2H2,TREX2,RAD54B,SMC5,RBM14,BCCIP,PRPF19,SETMAR,POLE2,GTF2H5,RBBP8,ESCO2,POLQ	6.67792e-15	biological_process	11
response to DNA damage stimulus	Group	236	236	35	14	PARP1,CHEK2,VCP,FANCA,TOPBP1,RAD23B,MSH6,REV1,UNG,TP53BP1,ATR,FANCI,FANCM,HUS1,RAD18,BLM,KIN,UHRF1,TOPORS,POLH,CLSPN,UBE2N,GTF2H2,TREX2,TDG,RAD54B,SMC5,BCCIP,DTL,PRPF19,SETMAR,TIPIN,AEN,GTF2H5,POLQ	2.99216e-14	biological_process	12
protein transport	Group	556	556	54	9	AP4B1,MON2,TIMM8B,RANBP6,C18orf55,LSG1,CHMP7,NUP35,C3orf31,SCFD2,TOMM5,NUP98,NUP214,NUP85,RINT1,STAM2,STAM,RAB11A,AP1G1,RANBP2,PSEN2,NUP153,SNX16,RABEP1,SEC13,APPBP2,RAB23,SNX5,RAB21,RAB18,PEX13,RAB2A,NXT1,CHCHD4,KPNA1,TIMM8A,TOMM22,SNX17,RAB5C,TIMM17A,RANBP3,DNAJC14,GGA2,TNPO1,TIMM10,NUP62,SAR1B,NUP93,DDX19A,PHAX,SAR1A,IPO4,FXC1,EIF4ENIF1	3.30928e-13	biological_process	13
protein folding	Group	194	194	29	14	GRPEL1,HSP90AA1,DNAJB6,HSPA8,DNAJB1,FKBP4,CLN3,DNAJA1,BAG3,DNAJC2,HSPE1,AIP,RANBP2,CCT6A,PDCL,BAG5,PPIH,PPIF,HSPA4L,DNAJC14,HSP90AA4P,TCP1alpha,PPIE,AHSA1,SACS,BAG2,CCT5,PPIL2,PFDN2	3.93247e-12	biological_process	14
intracellular protein transmembrane transport	Group	77	77	18	23	TIMM8B,C18orf55,NUP35,C3orf31,NUP98,NUP214,NUP85,RANBP2,NUP153,CHCHD4,TIMM8A,TOMM22,TIMM17A,TIMM10,NUP62,NUP93,DDX19A,FXC1	2.38327e-11	biological_process	15
spliceosomal snRNP biogenesis	Group	25	25	11	44	PRMT5,SMN2,NCBP1,PRMT7,SNRPD3,GEMIN5,WDR77,PHAX,SNRPD1,GEMIN6,SNRPF	8.82813e-11	biological_process	16
modification-dependent protein catabolic process	Group	501	501	46	9	UBE2D4,USP46,UBE2Z,FBXO30,USP38,VCP,TRAF6,RAD23B,FBXO5,RAD18,SOCS6,E4F1,SUMO3,UHRF1,TOPORS,UBE2N,WWP2,TRIM32,UBE2D1,RANBP2,CDC23,UFD1L,ZYG11A,UBE2L3,CDC26,SENP5,UBE2J2,SAE1,NPLOC4,FBXL10,UFM1,SOCS4,SOCS5,USP14,ANAPC13,DTL,RNF12,OTUB1,NFX1,RNF34,PPIL5,CNOT4,VPRBP,USP45,USP42,ASB6	1.27694e-10	biological_process	17
apoptosis	Group	550	550	47	8	SAP30BP,KIAA1967,FASTKD5,UBE2Z,FASTKD3,C3orf38,SPIN2B,HRAS,CASP8,MAP3K5,MCL1,BID,CTNNB1,NFKB1,JMJD6,BAG1,PHLDA1,CASP6,TFDP1,TRAF5,DFFA,SIVA1,CIAPIN1,STK17A,TP53BP2,TOPORS,BAG3,TRIAP1,PUF60,TNFAIP8,AVEN,PSEN2,RABEP1,BAG5,DIDO1,RNF34,DEDD2,ACIN1,DYRK2,SMNDC1,AEN,C11orf82,PTRH2,API5,BAG2,FASTKD2,PDCL3	8.70581e-10	biological_process	18
translation	Group	635	635	51	8	RPL36AL,MRPS12,EIF2B4,KIAA0664,MRPS18C,YARS2,MRPL2,MRPL4,MRPS7,MRPS2,MRPL27,MRPL35,MRPS21,MRPS14,MRPS11,MRPL34,MRP63,MRPL43,FDXACB1,MRPS36,MRPL52,TARSL2,EIF2S1,EIF3G,RPL35A,EIF2B1,EIF4G1,EIF6,EIF5,EIF3M,MRPL12,RPS27A,RPL34,FARSA,PDF,RPS3A,RPL27A,TSFM,LARS2,PELO,Jtv1,RPS14,PTRH2,MRPS17,MRPL55,GFM1,EARS2,RPS28,MARS2,AARSD1,EIF2B3	1.42171e-09	biological_process	19
mitosis	Group	213	213	26	12	SSSCA1,C21orf45,FAM83D,PRR6,CDC25A,CDC6,FBXO5,E4F1,HELLS,MAD2L2,ANLN,CDC23,RUVBL1,MIS12,AKAP8,CDC26,NOLC1,ANAPC13,CDCA5,TXNL4B,TARDBP,ZWILCH,TIPIN,LRRCC1,NCAPD3,ERCC6L	4.45752e-09	biological_process	20
transcription initiation from RNA polymerase II promoter	Group	73	73	15	20	MED23,MED17,GTF2H2,TAF2,TAF11,TAF5,POLR2C,MED26,MED24,POLR2L,GTF2E1,MED27,POLR2F,GTF2A2,POLR2K	7.38661e-09	biological_process	21
cell division	Group	266	266	29	10	SSSCA1,C21orf45,BIN3,FAM83D,PRR6,CCND1,CCNE1,CDC25A,CDC6,FBXO5,E4F1,HELLS,CCNE2,MAD2L2,ANLN,CDC23,RUVBL1,MIS12,CDC26,SENP5,ANAPC13,CDCA5,ZWILCH,PELO,TIPIN,CENPJ,LRRCC1,NCAPD3,ERCC6L	7.96205e-09	biological_process	22
mRNA transport	Group	71	71	14	19	NUP35,NUP98,NUP214,NUP85,MAGOH,RANBP2,NUP153,NXT1,NCBP1,NUP62,NUP93,DDX19A,RBM8A,ENY2	4.07057e-08	biological_process	23
biological_process	Group	3014	3014	143	4	DPH2,MFAP1,NDUFB3,SNRPB2,EIF2B4,WDR46,SERF2,TXNDC9,CHERP,SSSCA1,Ry1,ARMC8,MRPL46,MRPS28,CUTC,HN1,CHCHD8,CXorf26,C20orf43,UBE2D4,C21orf45,DDX49,KLHL28,LINS1,CWF19L1,THUMPD1,C20orf24,DDX31,UBE2Z,C14orf138,C16orf33,C16orf57,ARMC5,ACTR5,WBSCR16,ARPC5L,C16orf14,MKI67IP,C12orf29,ARMC6,MRFAP1L1,FTSJ3,EXOSC6,ZNF511,MRPL52,TARSL2,IRGQ,C16orf84,JMJD6,ALAS1,BCS1L,TRAPPC10,GNL3,TCOF1,BRMS1,ING1,SOCS6,RPL35A,…	4.57725e-07	biological_process	24
transcription from RNA polymerase III promoter	Group	18	18	7	38	TROVE2,IVNS1ABP,POLR3K,POLR2L,POLR2F,POLR2K,POLR3H	7.23877e-07	biological_process	25
protein targeting to mitochondrion	Group	31	31	8	25	TIMM8B,BID,AIP,TIMM8A,TIMM17A,TIMM10,TRNT1,FXC1	4.00008e-06	biological_process	26
RNA processing	Group	93	93	13	13	CHERP,POP1,CRNKL1,EXOSC6,RBM6,SART3,PNPT1,DEDD2,TRNT1,EXOSC4,RBM8A,LARP7,EXOSC7	7.26907e-06	biological_process	27
spliceosome assembly	Group	19	19	6	31	CRNKL1,USP39,SMN2,SMNDC1,SNRPD1,GEMIN6	1.87255e-05	biological_process	28
transcription from RNA polymerase II promoter	Group	167	167	17	10	ECD,PARP1,FOS,NFYA,MBD1,CEBPZ,HSF2,ABT1,TAF3,TAF1C,TCERG1,MED24,TARDBP,TRIP13,TAF1A,POLR2F,TAF5L	2.38095e-05	biological_process	29
interspecies interaction between organisms	Group	239	239	21	8	C9orf156,MAP3K5,NUP98,UNG,SIVA1,E4F1,EIF4G1,SMARCB1,KIN,DDX3X,GADD45GIP1,WWP2,SYNCRIP,KPNA1,RNGTT,NFX1,IVNS1ABP,TNPO1,VPRBP,ANKRD17,PDCL3	2.64913e-05	biological_process	30
negative regulation of ubiquitin-protein ligase activity during mitotic cell cycle	Group	64	64	10	15	PSMB2,PSMD12,FBXO5,PSMB10,PSMB5,UBE2D1,CDC23,CDC26,PSMD1,PSMA5	3.06298e-05	biological_process	31
DNA damage response, detection of DNA damage	Group	7	7	4	57	MRPS26,MRPS11,PARP1,DNAJA1	3.21945e-05	biological_process	32
negative regulation of DNA replication	Group	21	21	6	28	CDC6,GMNN,ATR,HUS1,TTF1,GTPBP4	3.54764e-05	biological_process	33
RNA elongation from RNA polymerase II promoter	Group	53	53	9	16	GTF2H2,TAF11,TAF5,POLR2C,POLR2L,GTF2E1,POLR2F,GTF2A2,POLR2K	3.85564e-05	biological_process	34
positive regulation of ubiquitin-protein ligase activity during mitotic cell cycle	Group	67	67	10	14	PSMB2,PSMD12,FBXO5,PSMB10,PSMB5,UBE2D1,CDC23,CDC26,PSMD1,PSMA5	4.60445e-05	biological_process	35
transport	Group	1807	1807	87	4	NDUFB3,SLC35B1,AP4B1,MON2,TIMM8B,RANBP6,C18orf55,LSG1,CHMP7,C3orf31,SLC10A4,AQP3,VCP,HBD,NUP214,TRAPPC10,OSBPL3,TCOF1,TXNL1,SLC19A1,G3BP1,CYB561D2,TXNRD1,NUP85,UHRF1,RINT1,STAM2,MAGOH,STAM,RAB11A,AP1G1,SLC39A6,SLC30A1,SLC25A19,RANBP2,SNX16,RABEP1,SEC13,APPBP2,RAB23,SNX5,RAB21,RAB18,PEX13,RAB2A,NXT1,CHCHD4,NCBP1,KPNA1,FABP5,TIMM8A,TOMM22,SNX17,ABCF2,RAB5C,PGM2,RANBP3,MRS2,DNAJC14,GGA2,TNPO1,TIMM10…	6.21194e-05	biological_process	36
protein import into mitochondrial inner membrane	Group	8	8	4	50	TIMM8B,TIMM8A,TIMM10,FXC1	6.27725e-05	biological_process	37
double-strand break repair via homologous recombination	Group	16	16	5	31	HUS1,BLM,RPA1,UBE2N,RAD54B	0.000102062	biological_process	38
transcription from RNA polymerase I promoter	Group	9	9	4	44	TAF1C,TAF1A,POLR2F,POLR1C	0.000110157	biological_process	39
mitochondrial outer membrane translocase complex assembly	Group	4	4	3	75	HSP90AA1,SAMM50,TOMM22	0.000123045	biological_process	40
transcription initiation from RNA polymerase I promoter	Group	4	4	3	75	TTF1,RRN3,PTRF	0.000123045	biological_process	41
androgen receptor signaling pathway	Group	37	37	7	18	CCNE1,CTNNB1,DNAJA1,MED17,NRIP1,MED24,RNF4	0.00013864	biological_process	42
anaphase-promoting complex-dependent proteasomal ubiquitin-dependent protein catabolic process	Group	64	64	9	14	PSMB2,PSMD12,PSMB10,PSMB5,UBE2D1,CDC23,CDC26,PSMD1,PSMA5	0.000175777	biological_process	43
intracellular protein transport	Group	235	235	19	8	AP4B1,PCNA,STAM2,STAM,KLHL2,AP1G1,SEC13,APPBP2,RAB2A,KPNA1,SNX17,TIMM17A,GGA2,TNPO1,SAR1B,C14orf108,SAR1A,IPO4,SEC23IP	0.000188674	biological_process	44
protein modification process	Group	217	217	18	8	RABGGTB,C16orf33,DDI2,UBLCP1,ICMT,BAG1,RAD23B,SUMO3,UHRF1,WWP2,UBQLN1,SAE1,SEPHS1,RPS27A,USP14,SACS,PPP4R2,C3orf16	0.000201032	biological_process	45
negative regulation of translational initiation in response to stress	Group	5	5	3	60	EIF2B4,EIF2B1,EIF2B3	0.000300353	biological_process	46
N-terminal protein amino acid acetylation	Group	5	5	3	60	ARD1A,NARG1,NAT13	0.000300353	biological_process	47
regulation of transcription from RNA polymerase II promoter	Group	264	264	20	7	NR4A2,WT1,SMAD1,TFDP1,NR2F2,NFYA,SMARCB1,UHRF1,MED23,MED17,RUVBL1,SUB1,ZNF367,MED6,MED26,TCF19,MED27,RNF4,RBBP8,CIAO1	0.000306467	biological_process	48
regulation of cyclin-dependent protein kinase activity	Group	42	42	7	16	CDC25A,CDC6,BLM,CCNE2,SERTAD1,BCCIP,GTPBP4	0.000316734	biological_process	49
positive regulation of transcription	Group	153	153	14	9	EGR1,CTNNB1,FOS,NFKB1,ING1,BLM,TOPORS,NOLC1,RPS27A,SERTAD1,NUP62,ZNF326,SERTAD3,PHF5A	0.000371704	biological_process	50
regulation of growth	Group	71	71	9	12	BRMS1L,SOCS6,E4F1,EPC1,PPP2CA,RUVBL1,SOCS4,SOCS5,DMAP1	0.000390519	biological_process	51
DNA methylation	Group	21	21	5	23	FOS,CTCF,HELLS,MBD1,DMAP1	0.000416909	biological_process	52
regulation of apoptosis	Group	177	177	15	8	CASP8,MCL1,BID,VCP,TRAF6,BAG1,CASP6,LGALS1,PHB,TRAF5,BAG3,PPIF,DEDD2,PGP,C9orf89	0.000529556	biological_process	53
coenzyme A biosynthetic process	Group	6	6	3	50	PANK1,PANK3,PANK4	0.000586554	biological_process	54
positive regulation of transcription, DNA-dependent	Group	144	144	13	9	EGR1,CCNE1,CTNNB1,TFDP1,TCF3,TP53BP1,SOX4,CTCF,NFYA,NARG1,MRPL12,RNF4,PHF5A	0.000675229	biological_process	55
response to unfolded protein	Group	63	63	8	12	HSP90AA1,DNAJB6,HSPA8,DNAJB1,HSPH1,DNAJA1,HSPE1,HSPA4L	0.000805315	biological_process	56
regulation of translation	Group	80	80	9	11	EIF2B4,GCN1L1,EIF2S1,EIF2B1,EIF4G1,IGF2BP1,EIF4E2,NGDN,EIF2B3	0.000945202	biological_process	57
centromeric heterochromatin formation	Group	2	2	2	100	PRR6,HELLS	0.000998622	biological_process	58
septin ring assembly	Group	2	2	2	100	ANLN,NUBP1	0.000998622	biological_process	59
protein import into mitochondrial matrix	Group	2	2	2	100	GRPEL1,C3orf31	0.000998622	biological_process	60
iron incorporation into metallo-sulfur cluster	Group	2	2	2	100	FXN,NFS1	0.000998622	biological_process	61
mRNA capping	Group	2	2	2	100	RNGTT,RNMT	0.000998622	biological_process	62
tRNA 5'-leader removal	Group	2	2	2	100	POP1,RPP40	0.000998622	biological_process	63
translational initiation	Group	51	51	7	13	EIF2B4,EIF1AD,EIF2B1,EIF5,EIF4E2,RPS3A,EIF2B3	0.00106284	biological_process	64
negative regulation of transcription from RNA polymerase II promoter	Group	293	293	20	6	RARA,EGR1,CTNNB1,WT1,NR2F2,ZNF148,CBX2,CTCF,EPC1,NRIP1,DDX20,TDG,TRIM27,DLX1,BHLHB3,NFX1,ZNF281,RPS14,ZNF593,DR1	0.00113315	biological_process	65
proteasomal ubiquitin-dependent protein catabolic process	Group	26	26	5	19	PSMD12,VCP,RAD23B,PSMB5,UCHL5IP	0.00118235	biological_process	66
cell proliferation	Group	385	385	24	6	PCNA,HRAS,CTNNB1,CDC25A,MAP3K2,TFDP1,NAB2,KHDRBS1,GNL3,E4F1,TUSC2,TXNRD1,UHRF1,IFI16,PRMT5,PPP1R8,TRIM27,RRN3,MXD1,BHLHB3,E2F8,TCF19,GNB4,PELO	0.00135425	biological_process	67
ubiquitin-dependent protein catabolic process	Group	196	196	15	7	PSMB2,USP46,USP38,PSMB10,PSMB5,UBE2N,UBE2D1,CDC23,USP39,UFD1L,UBE2L3,USP14,USP45,PSMA5,USP42	0.00149865	biological_process	68
tetrahydrobiopterin biosynthetic process	Group	8	8	3	37	PTS,QDPR,SPR	0.00156605	biological_process	69
postreplication repair	Group	8	8	3	37	POLH,UBE2N,WDR33	0.00156605	biological_process	70
negative regulation of transcription	Group	159	159	13	8	RARA,PHB,NAB2,KHDRBS1,CBX2,MBD1,ZNF24,ZEB2,DDX20,RNF12,DEDD2,DMAP1,BCLAF1	0.00168083	biological_process	71
nucleotide-excision repair, DNA gap filling	Group	17	17	4	23	PCNA,RPA1,RFC3,POLE2	0.00169987	biological_process	72
ribosome assembly	Group	9	9	3	33	TSR1,SURF6,NIP7	0.002294	biological_process	73
DNA replication checkpoint	Group	9	9	3	33	CDC6,CLSPN,TIPIN	0.002294	biological_process	74
methionine biosynthetic process	Group	9	9	3	33	MTHFD2L,MTRR,ADI1	0.002294	biological_process	75
induction of apoptosis	Group	207	207	15	7	SAP30BP,PHLDA1,EI24,CASP6,DFFA,SIVA1,STK17A,TP53BP2,PPP2CA,DDX20,RPS3A,SMNDC1,BCLAF1,UTP11L,DDX19A	0.00255005	biological_process	76
response to corticosterone stimulus	Group	19	19	4	21	CCND1,CCNE1,FOS,PEBP1	0.00263266	biological_process	77
mitotic metaphase plate congression	Group	3	3	2	66	CDC23,CDCA5	0.00293285	biological_process	78
N-acetylneuraminate biosynthetic process	Group	3	3	2	66	NANP,GNE	0.00293285	biological_process	79
C-terminal protein amino acid methylation	Group	3	3	2	66	ICMT,LCMT2	0.00293285	biological_process	80
histone mRNA 3'-end processing	Group	3	3	2	66	SLBP,LSM10	0.00293285	biological_process	81
tRNA methylation	Group	3	3	2	66	FLJ20628,NSUN2	0.00293285	biological_process	82
cellular response to stimulus	Group	10	10	3	30	EIF2B4,EIF2B1,EIF2B3	0.00320043	biological_process	83
DNA replication initiation	Group	21	21	4	19	CCNE1,MCM3,CCNE2,MCM4	0.00386634	biological_process	84
copper ion transport	Group	21	21	4	19	CUTC,FKBP4,SCO2,SCO1	0.00386634	biological_process	85
response to stress	Group	239	239	16	6	HSPB11,HSP90AA1,FOS,NR4A2,BAG1,HSPA8,DNAJB1,STIP1,HSPH1,KIN,PEBP1,HSPE1,HSF2,HSPA4L,HSP90AA4P,AHSA1	0.00408999	biological_process	86
morphogenesis of embryonic epithelium	Group	22	22	4	18	CTNNB1,TBX18,GRSF1,PGP	0.00460874	biological_process	87
translational elongation	Group	161	161	12	7	RPL35A,RPS27A,RPL34,RPS3A,RPL27A,TSFM,RPL37A,RPS14,RPL41,GFM1,RPS26,RPS28	0.00526869	biological_process	88
nuclear-transcribed mRNA catabolic process, nonsense-mediated decay	Group	23	23	4	17	MAGOH,RNPS1,EIF4A3,RBM8A	0.00544127	biological_process	89
Wnt receptor signaling pathway through beta-catenin	Group	12	12	3	25	CCND1,CTNNB1,SOX4	0.00559665	biological_process	90
replication fork protection	Group	4	4	2	50	BLM,TIPIN	0.00574266	biological_process	91
negative regulation of gene expression, epigenetic	Group	4	4	2	50	EPC1,TRIM27	0.00574266	biological_process	92
maintenance of DNA methylation	Group	4	4	2	50	CTCF,HELLS	0.00574266	biological_process	93
negative regulation of nitric-oxide synthase activity	Group	4	4	2	50	GLA,NOSIP	0.00574266	biological_process	94
nucleolus organization	Group	4	4	2	50	NOLC1,RRN3	0.00574266	biological_process	95
phenylalanyl-tRNA aminoacylation	Group	4	4	2	50	FDXACB1,FARSA	0.00574266	biological_process	96
peptidyl-arginine methylation	Group	4	4	2	50	PRMT1,PRMT7	0.00574266	biological_process	97
blastocyst hatching	Group	4	4	2	50	SMARCB1,RBBP8	0.00574266	biological_process	98
DNA recombination	Group	69	69	7	10	RECQL4,BLM,RPA1,KIN,RUVBL1,SMC5,RBM14	0.00607808	biological_process	99
chromatin modification	Group	186	186	13	6	CBX2,SMARCB1,PRMT5,EPC1,RUVBL1,FBXL10,TAF5,SETMAR,DMAP1,L3MBTL2,UTP3,C14orf169,ENY2	0.00644032	biological_process	100
regulation of transcription	Group	533	533	28	5	SFMBT1,RARA,CTNNB1,NFKB1,TFDP1,TCF3,NAB2,E4F1,DNAJC2,SIX1,GTF2H2,PPP2CA,HSF2,MXD1,DLX1,BHLHB3,TAF5,C2orf3,MED6,PTGES2,POLR3K,L3MBTL2,BRF2,PPIE,POLR2L,MED31,AHCTF1,TAF5L	0.00652613	biological_process	101
tRNA aminoacylation for protein translation	Group	70	70	7	10	WDR46,YARS2,TARSL2,FARSA,LARS2,EARS2,MARS2	0.00657366	biological_process	102
response to organic nitrogen	Group	54	54	6	11	PSMB2,CCND1,CCNE1,SMAD1,CASP6,PEBP1	0.0069774	biological_process	103
protein polyubiquitination	Group	25	25	4	16	TRAF6,UBE2D1,PRPF19,PPIL2	0.00739487	biological_process	104
response to ionizing radiation	Group	25	25	4	16	TOPBP1,TP53BP2,RAD54B,AEN	0.00739487	biological_process	105
estrogen receptor signaling pathway	Group	14	14	3	21	RARA,SAFB,RBM14	0.00883393	biological_process	106
DNA unwinding during replication	Group	14	14	3	21	TOP3B,MCM4,C10orf2	0.00883393	biological_process	107
response to iron ion	Group	14	14	3	21	CCND1,CASP6,FXN	0.00883393	biological_process	108
positive regulation of T cell cytokine production	Group	5	5	2	40	TRAF6,MAP3K7	0.00937087	biological_process	109
G2-M transition DNA damage checkpoint	Group	5	5	2	40	BLM,RINT1	0.00937087	biological_process	110
rRNA methylation	Group	5	5	2	40	FTSJ3,TFB2M	0.00937087	biological_process	111
transcription from mitochondrial promoter	Group	5	5	2	40	MRPL12,TFB2M	0.00937087	biological_process	112
tRNA pseudouridine synthesis	Group	5	5	2	40	PUS7L,PUS7	0.00937087	biological_process	113
T cell receptor signaling pathway	Group	27	27	4	14	TRAF6,MAP3K7,UBE2N,PSEN2	0.00976107	biological_process	114
positive regulation of transcription from RNA polymerase II promoter	Group	382	382	21	5	RARA,EGR1,CTNNB1,FOS,NFKB1,TRAF6,NR4A2,WT1,SMAD1,ZNF148,SOX4,NFYA,MED17,EPC1,SIX1,SDPR,NRIP1,TTF1,RBM14,MED6,RNF4	0.0106131	biological_process	115
chaperone mediated protein folding requiring cofactor	Group	15	15	3	20	HSPA8,DNAJB1,HSPH1	0.0107861	biological_process	116
negative regulation of cell cycle	Group	156	156	11	7	WT1,HPGD,GMNN,BRMS1,ING1,CTCF,SMARCB1,TP53BP2,TUSC2,PNN,CDK2AP1	0.010954	biological_process	117
ER to Golgi vesicle-mediated transport	Group	44	44	5	11	VCP,SEC13,RAB2A,SAR1B,SAR1A	0.0122428	biological_process	118
negative regulation of apoptosis	Group	180	180	12	6	MAP3K7,BAG1,UNG,DFFA,SOX4,NP,CLN3,BAG3,GCLM,PSEN2,RRN3,NUP62	0.0122956	biological_process	119
protein ubiquitination	Group	98	98	8	8	VCP,UBE2N,UBE2L3,SAE1,RPS27A,PRPF19,NOSIP,PPIL2	0.0125242	biological_process	120
oligodendrocyte development	Group	16	16	3	18	EIF2B4,EIF2B1,EIF2B3	0.0129676	biological_process	121
protein import into nucleus	Group	45	45	5	11	CFL1,NUP214,RANBP2,KPNA1,PRICKLE1	0.0134239	biological_process	122
positive regulation of interleukin-2 production	Group	6	6	2	33	TRAF6,MAP3K7	0.013763	biological_process	123
regulation of transcription from RNA polymerase I promoter	Group	6	6	2	33	POLR2L,POLR2K	0.013763	biological_process	124
phosphoenolpyruvate-dependent sugar phosphotransferase system	Group	6	6	2	33	TP53BP1,TCOF1	0.013763	biological_process	125
I-kappaB phosphorylation	Group	6	6	2	33	CHUK,MAP3K7	0.013763	biological_process	126
5S class rRNA transcription	Group	6	6	2	33	GTF3C6,GTF3C4	0.013763	biological_process	127
tRNA transcription from RNA polymerase III promoter	Group	6	6	2	33	GTF3C6,GTF3C4	0.013763	biological_process	128
protein complex assembly	Group	121	121	9	7	TUBGCP4,MKI67IP,VAMP8,FANCA,PPIH,MED31,MPP6,GEMIN5,NFS1	0.0147832	biological_process	129
metabolic process	Group	858	858	39	4	KIAA0664,METTL13,DUS3L,DUS1L,PYCRL,NANP,PRR6,MTHFD2L,ME1,ALAS1,HPGD,IDH3A,UNG,ARD1A,NAT1,ACAD9,TDG,SAE1,AGL,QDPR,ALDH1B1,N-pac,LPCAT1,UMPS,GLA,GCDH,UCK2,GALE,RPE,SPR,PGP,UAP1,NAT10,NFS1,NAT13,C20orf7,MOCS3,PGAM5,RDH13	0.0156114	biological_process	130
odontogenesis of dentine-containing tooth	Group	48	48	5	10	CTNNB1,CHUK,TRAF6,DLX1,PGP	0.0174207	biological_process	131
protein import into nucleus, docking	Group	18	18	3	16	NUP98,TNPO1,IPO4	0.0180322	biological_process	132
negative regulation of catalytic activity	Group	18	18	3	16	NQO1,CLN3,NOSIP	0.0180322	biological_process	133
methylation	Group	18	18	3	16	FTSJ3,N6AMT2,TRMT11	0.0180322	biological_process	134
microtubule polymerization	Group	7	7	2	28	FBXO5,CENPJ	0.0188673	biological_process	135
positive regulation of DNA repair	Group	7	7	2	28	NP,UBE2N	0.0188673	biological_process	136
G2 phase of mitotic cell cycle	Group	7	7	2	28	BLM,DNAJC2	0.0188673	biological_process	137
tRNA aminoacylation	Group	7	7	2	28	TARSL2,AARSD1	0.0188673	biological_process	138
UDP-N-acetylglucosamine metabolic process	Group	7	7	2	28	GNE,UAP1	0.0188673	biological_process	139
response to vitamin E	Group	7	7	2	28	CCND1,CCNE1	0.0188673	biological_process	140
amino acid biosynthetic process	Group	33	33	4	12	PYCRL,MTHFD2L,MTRR,ADI1	0.0196164	biological_process	141
DNA damage response, signal transduction by p53 class mediator resulting in induction of apoptosis	Group	19	19	3	15	IFI16,DYRK2,AEN	0.0209197	biological_process	142
regulation of cell cycle	Group	69	69	6	8	CCND1,CCNE1,HSPA8,NUP214,CCNE2,PPP2CA	0.0218197	biological_process	143
microtubule-based process	Group	52	52	5	9	TUBB2C,TUBA4A,TUBB,TUBB2A,DYNLL2	0.0238722	biological_process	144
protein amino acid methylation	Group	20	20	3	15	ICMT,PRMT1,PRMT7	0.024045	biological_process	145
anti-apoptosis	Group	198	198	12	6	MCL1,NFKB1,BAG1,CFL1,CIAPIN1,HELLS,C6orf66,BAG3,TRIAP1,AVEN,SON,API5	0.0241075	biological_process	146
maintenance of protein location in nucleus	Group	8	8	2	25	TOPORS,TAF3	0.0246344	biological_process	147
transcription termination	Group	8	8	2	25	TTF1,PTRF	0.0246344	biological_process	148
cysteine metabolic process	Group	8	8	2	25	GCLM,NFS1	0.0246344	biological_process	149
Mo-molybdopterin cofactor biosynthetic process	Group	8	8	2	25	NFS1,MOCS3	0.0246344	biological_process	150
somatic recombination of immunoglobulin gene segments	Group	8	8	2	25	MSH6,UNG	0.0246344	biological_process	151
folic acid transport	Group	8	8	2	25	SLC19A1,SLC25A32	0.0246344	biological_process	152
protein autoprocessing	Group	8	8	2	25	PARP1,FXN	0.0246344	biological_process	153
regulation of protein metabolic process	Group	71	71	6	8	UBE2D4,UBE2Z,UBE2N,UBE2D1,UBE2L3,UBE2J2	0.0247398	biological_process	154
neural tube closure	Group	36	36	4	11	TRAF6,VASP,ZEB2,ZIC2	0.0262271	biological_process	155
membrane fusion	Group	36	36	4	11	NSFL1C,VAMP8,RABEP1,NPLOC4	0.0262271	biological_process	156
RNA metabolic process	Group	36	36	4	11	DDX24,EIF4G1,NCBP1,POP5	0.0262271	biological_process	157
DNA damage checkpoint	Group	21	21	3	14	CHEK2,ATR,HUS1	0.0274081	biological_process	158
mitotic chromosome condensation	Group	21	21	3	14	AKAP8,CDCA5,NCAPD3	0.0274081	biological_process	159
Golgi organization	Group	21	21	3	14	NSFL1C,NPLOC4,SEC23IP	0.0274081	biological_process	160
nucleotide-excision repair, DNA damage removal	Group	21	21	3	14	RAD23B,RPA1,GTF2H2	0.0274081	biological_process	161
proteolysis involved in cellular protein catabolic process	Group	22	22	3	13	PSMB2,PSMB10,PSMB5	0.031008	biological_process	162
spindle assembly	Group	9	9	2	22	FBXO5,TUBB	0.0310174	biological_process	163
respiratory chain complex IV assembly	Group	9	9	2	22	SCO2,SCO1	0.0310174	biological_process	164
positive regulation of Wnt receptor signaling pathway	Group	9	9	2	22	SOX4,ZEB2	0.0310174	biological_process	165
regulation of exit from mitosis	Group	9	9	2	22	ANLN,CDC23	0.0310174	biological_process	166
embryonic development ending in birth or egg hatching	Group	9	9	2	22	FXN,TP53BP2	0.0310174	biological_process	167
regulation of translational initiation	Group	38	38	4	10	EIF3G,EIF4G1,EIF5,TRMT6	0.0312912	biological_process	168
response to UV	Group	38	38	4	10	MSH6,REV1,HUS1,GTF2H2	0.0312912	biological_process	169
actin cortical patch assembly	Group	1	1	1	100	CORO1C	0.0316182	biological_process	170
protein import into peroxisome matrix, docking	Group	1	1	1	100	PEX13	0.0316182	biological_process	171
axonemal dynein complex assembly	Group	1	1	1	100	C14orf104	0.0316182	biological_process	172
steroid hormone receptor complex assembly	Group	1	1	1	100	FKBP4	0.0316182	biological_process	173
mitochondrial respiratory chain complex IV assembly	Group	1	1	1	100	BCS1L	0.0316182	biological_process	174
mature ribosome assembly	Group	1	1	1	100	EIF6	0.0316182	biological_process	175
spindle assembly involved in female meiosis I	Group	1	1	1	100	FBXO5	0.0316182	biological_process	176
negative regulation of interleukin-12 biosynthetic process	Group	1	1	1	100	NFKB1	0.0316182	biological_process	177
positive regulation of cAMP-mediated signaling	Group	1	1	1	100	PEBP1	0.0316182	biological_process	178
positive regulation of cytokinesis	Group	1	1	1	100	PRR6	0.0316182	biological_process	179
positive regulation of acetylcholine metabolic process	Group	1	1	1	100	PEBP1	0.0316182	biological_process	180
positive regulation of mRNA 3'-end processing	Group	1	1	1	100	NCBP1	0.0316182	biological_process	181
positive regulation of interleukin-5 production	Group	1	1	1	100	RARA	0.0316182	biological_process	182
positive regulation of interleukin-13 production	Group	1	1	1	100	RARA	0.0316182	biological_process	183
regulation of DNA replication during S phase	Group	1	1	1	100	TIPIN	0.0316182	biological_process	184
regulation of mitotic cell cycle, embryonic	Group	1	1	1	100	E4F1	0.0316182	biological_process	185
regulation of histone ubiquitination	Group	1	1	1	100	UBE2N	0.0316182	biological_process	186
unidimensional cell growth	Group	1	1	1	100	BIN3	0.0316182	biological_process	187
negative regulation of collagen binding	Group	1	1	1	100	GTPBP4	0.0316182	biological_process	188
negative regulation of ubiquitin-protein ligase activity during meiotic cell cycle	Group	1	1	1	100	FBXO5	0.0316182	biological_process	189
positive regulation of glutamate-cysteine ligase activity	Group	1	1	1	100	GCLM	0.0316182	biological_process	190
regulation of ferrochelatase activity	Group	1	1	1	100	FXN	0.0316182	biological_process	191
autophagic vacuole fusion	Group	1	1	1	100	CLN3	0.0316182	biological_process	192
meiotic mismatch repair	Group	1	1	1	100	MSH6	0.0316182	biological_process	193
spindle astral microtubule nucleation	Group	1	1	1	100	CENPJ	0.0316182	biological_process	194
barrier septum formation	Group	1	1	1	100	BIN3	0.0316182	biological_process	195
synaptic target recognition	Group	1	1	1	100	DYNLL2	0.0316182	biological_process	196
histone H3-R2 demethylation	Group	1	1	1	100	JMJD6	0.0316182	biological_process	197
histone H4-R3 demethylation	Group	1	1	1	100	JMJD6	0.0316182	biological_process	198
late endosome to vacuole transport	Group	1	1	1	100	CHMP7	0.0316182	biological_process	199
pteridine metabolic process	Group	1	1	1	100	SPR	0.0316182	biological_process	200
transcription of nuclear rRNA large RNA polymerase I transcript	Group	1	1	1	100	TCOF1	0.0316182	biological_process	201
FasL biosynthetic process	Group	1	1	1	100	PHLDA1	0.0316182	biological_process	202
NAD biosynthesis via nicotinamide riboside salvage pathway	Group	1	1	1	100	NP	0.0316182	biological_process	203
tRNA catabolic process	Group	1	1	1	100	POP1	0.0316182	biological_process	204
deoxyguanosine catabolic process	Group	1	1	1	100	NP	0.0316182	biological_process	205
deoxyinosine catabolic process	Group	1	1	1	100	NP	0.0316182	biological_process	206
inosine catabolic process	Group	1	1	1	100	NP	0.0316182	biological_process	207
guanosine catabolic process	Group	1	1	1	100	NP	0.0316182	biological_process	208
globoside metabolic process	Group	1	1	1	100	CLN3	0.0316182	biological_process	209
error-prone postreplication DNA repair	Group	1	1	1	100	REV1	0.0316182	biological_process	210
box H-ACA snoRNA metabolic process	Group	1	1	1	100	NOLC1	0.0316182	biological_process	211
tRNA 3'-end processing	Group	1	1	1	100	TRNT1	0.0316182	biological_process	212
tRNA-type intron splice site recognition and cleavage	Group	1	1	1	100	TSEN34	0.0316182	biological_process	213
formate metabolic process	Group	1	1	1	100	MTHFS	0.0316182	biological_process	214
radial pattern formation	Group	1	1	1	100	NR2F2	0.0316182	biological_process	215
deoxynucleotide transport	Group	1	1	1	100	SLC25A19	0.0316182	biological_process	216
biotin transport	Group	1	1	1	100	SLC5A6	0.0316182	biological_process	217
pantothenate transport	Group	1	1	1	100	SLC5A6	0.0316182	biological_process	218
acute inflammatory response to non-antigenic stimulus	Group	1	1	1	100	CASP6	0.0316182	biological_process	219
response to muscle inactivity	Group	1	1	1	100	PKM2	0.0316182	biological_process	220
positive regulation of I-kappaB kinase-NF-kappaB cascade	Group	96	96	7	7	CASP8,TRAF6,MAP3K7,LGALS1,TRAF5,UBE2N,NUP62	0.0326049	biological_process	221
G1-S transition of mitotic cell cycle	Group	57	57	5	8	CCND1,CCNE1,CDC25A,CDCA5,RBBP8	0.0338663	biological_process	222
electron transport chain	Group	118	118	8	6	NDUFB3,TXNL1,CYB561D2,TXNRD1,NDUFB7,NDUFV3,CYB5B,NDUFB2	0.0338969	biological_process	223
positive regulation of specific transcription from RNA polymerase II promoter	Group	39	39	4	10	CTNNB1,NFKB1,TCF3,GTF2A2	0.0340236	biological_process	224
chromosome segregation	Group	39	39	4	10	TOP3B,PSEN2,MIS12,EBNA1BP2	0.0340236	biological_process	225
mitochondrial electron transport, NADH to ubiquinone	Group	39	39	4	10	NDUFB3,NDUFB7,NDUFV3,NDUFB2	0.0340236	biological_process	226
activation of pro-apoptotic gene products	Group	23	23	3	13	CASP8,BID,DEDD2	0.034843	biological_process	227
DNA-dependent DNA replication	Group	23	23	3	13	RPA1,CDK2AP1,POLE2	0.034843	biological_process	228
response to gamma radiation	Group	23	23	3	13	CHEK2,CASP6,NP	0.034843	biological_process	229
cellular protein metabolic process	Group	40	40	4	10	PSEN2,CCT6A,TCP1alpha,CCT5	0.0368904	biological_process	230
M phase of mitotic cell cycle	Group	10	10	2	20	CDC25A,MPHOSPH6	0.0379716	biological_process	231
inner cell mass cell proliferation	Group	10	10	2	20	GINS1,PRPF19	0.0379716	biological_process	232
L-phenylalanine catabolic process	Group	10	10	2	20	PTS,QDPR	0.0379716	biological_process	233
DNA synthesis during DNA repair	Group	10	10	2	20	POLH,RFC3	0.0379716	biological_process	234
phosphatidylinositol biosynthetic process	Group	10	10	2	20	IMPA1,PIP4K2C	0.0379716	biological_process	235
amyloid precursor protein catabolic process	Group	10	10	2	20	CLN3,PSEN2	0.0379716	biological_process	236
mRNA cleavage	Group	10	10	2	20	NCBP1,POP4	0.0379716	biological_process	237
somatic hypermutation of immunoglobulin genes	Group	10	10	2	20	MSH6,UNG	0.0379716	biological_process	238
anterior-posterior axis specification	Group	10	10	2	20	CTNNB1,TBX18	0.0379716	biological_process	239
response to gravity	Group	10	10	2	20	FOS,PKM2	0.0379716	biological_process	240
thymus development	Group	24	24	3	12	CTNNB1,SIX1,PSEN2	0.0389108	biological_process	241
response to heat	Group	60	60	5	8	EIF2B4,CASP6,EIF2B1,PEBP1,EIF2B3	0.0409412	biological_process	242
neural tube formation	Group	11	11	2	18	CASP8,MAP3K7	0.0454547	biological_process	243
S phase of mitotic cell cycle	Group	11	11	2	18	TFDP1,CDK2AP1	0.0454547	biological_process	244
Golgi to endosome transport	Group	11	11	2	18	MON2,RABEP1	0.0454547	biological_process	245
iron-sulfur cluster assembly	Group	11	11	2	18	FXN,CIAO1	0.0454547	biological_process	246
protein polymerization	Group	43	43	4	9	TUBB2C,TUBA4A,TUBB,TUBB2A	0.0462995	biological_process	247
reciprocal meiotic recombination	Group	26	26	3	11	TOPBP1,RAD54B,TRIP13	0.0477325	biological_process	248
base-excision repair	Group	26	26	3	11	PARP1,UNG,TDG	0.0477325	biological_process	249
mismatch repair	Group	27	27	3	11	MSH6,TDG,ANKRD17	0.0524789	biological_process	250
cell redox homeostasis	Group	85	85	6	7	GSR,TXNL1,TXNRD1,SCO2,SCO1,PTGES2	0.0525143	biological_process	251
natural killer cell mediated cytotoxicity	Group	12	12	2	16	TUBB2C,TUBB	0.0534263	biological_process	252
regulation of mitochondrial membrane permeability	Group	12	12	2	16	BID,PPIF	0.0534263	biological_process	253
cellular homeostasis	Group	12	12	2	16	MCL1,DEDD2	0.0534263	biological_process	254
cellular copper ion homeostasis	Group	12	12	2	16	SCO2,SCO1	0.0534263	biological_process	255
microtubule nucleation	Group	12	12	2	16	TUBGCP4,CENPJ	0.0534263	biological_process	256
polyamine metabolic process	Group	12	12	2	16	ODC1,AMD1	0.0534263	biological_process	257
folic acid and derivative biosynthetic process	Group	12	12	2	16	MTHFD2L,MTHFS	0.0534263	biological_process	258
response to lithium ion	Group	12	12	2	16	BAG1,IMPA1	0.0534263	biological_process	259
negative regulation of neuron apoptosis	Group	65	65	5	7	HRAS,NR4A2,CLN3,GCLM,DLX1	0.0545812	biological_process	260
MAPKKK cascade	Group	65	65	5	7	MAP3K5,MAP3K7,SMAD1,PEBP1,NDST1	0.0545812	biological_process	261
response to glucose stimulus	Group	65	65	5	7	EIF2B4,CASP6,EIF2B1,ENSA,EIF2B3	0.0545812	biological_process	262
negative regulation of cell growth	Group	86	86	6	6	EI24,ING1,DNAJC2,PPP2CA,SERTAD1,SERTAD3	0.0550145	biological_process	263
neutrophil chemotaxis	Group	28	28	3	10	IL8,CXCL2,CXCL3	0.0574433	biological_process	264
oxidation reduction	Group	702	702	30	4	DUS3L,DUS1L,PYCRL,RFESD,MTHFD2L,JMJD6,GSR,ME1,HPGD,IDH3A,AKR1C1,NQO1,RRM2,TXNRD1,GCLM,HCCS,SCO2,ACAD9,MTRR,NSUN2,SEPX1,QDPR,FBXL10,ALDH1B1,GCDH,OGFOD1,ADI1,SPR,ADO,RDH13	0.060156	biological_process	265
regulation of protein binding	Group	13	13	2	15	ATR,PRMT7	0.0618481	biological_process	266
striated muscle cell differentiation	Group	13	13	2	15	HRAS,CHUK	0.0618481	biological_process	267
mRNA polyadenylation	Group	13	13	2	15	GRSF1,CSTF2T	0.0618481	biological_process	268
cellular response to DNA damage stimulus	Group	13	13	2	15	TP53BP1,PAXIP1	0.0618481	biological_process	269
cellular chaperone-mediated protein complex assembly	Group	2	2	1	50	HSP90AA1	0.0622377	biological_process	270
negative regulation of cell division	Group	2	2	1	50	BLM	0.0622377	biological_process	271
negative regulation of sister chromatid cohesion	Group	2	2	1	50	RECQL4	0.0622377	biological_process	272
negative regulation of mitotic recombination	Group	2	2	1	50	BLM	0.0622377	biological_process	273
positive regulation of cytotoxic T cell differentiation	Group	2	2	1	50	HSP90AA1	0.0622377	biological_process	274
positive regulation of retinal cell programmed cell death	Group	2	2	1	50	CASP6	0.0622377	biological_process	275
positive regulation of astrocyte differentiation	Group	2	2	1	50	PRPF19	0.0622377	biological_process	276
regulation of centriole-centriole cohesion	Group	2	2	1	50	CTNNB1	0.0622377	biological_process	277
regulation of transcription from RNA polymerase II promoter involved in forebrain neuron fate commitment	Group	2	2	1	50	DLX1	0.0622377	biological_process	278
regulation of double-strand break repair via homologous recombination	Group	2	2	1	50	TEX15	0.0622377	biological_process	279
activation of phospholipase C activity by metabotropic glutamate receptor signaling pathway	Group	2	2	1	50	HOMER1	0.0622377	biological_process	280
copper ion homeostasis	Group	2	2	1	50	CUTC	0.0622377	biological_process	281
myoblast migration	Group	2	2	1	50	SIX1	0.0622377	biological_process	282
Schwann cell proliferation	Group	2	2	1	50	CTNNB1	0.0622377	biological_process	283
recognition of apoptotic cell	Group	2	2	1	50	JMJD6	0.0622377	biological_process	284
histone H3 acetylation	Group	2	2	1	50	TCF3	0.0622377	biological_process	285
histone H4 acetylation	Group	2	2	1	50	TCF3	0.0622377	biological_process	286
cerebral cortex GABAergic interneuron fate commitment	Group	2	2	1	50	DLX1	0.0622377	biological_process	287
plasma membrane to endosome transport	Group	2	2	1	50	RAB11A	0.0622377	biological_process	288
snRNP protein import into nucleus	Group	2	2	1	50	PPIH	0.0622377	biological_process	289
snRNA export from nucleus	Group	2	2	1	50	PHAX	0.0622377	biological_process	290
microtubule-based peroxisome localization	Group	2	2	1	50	PEX13	0.0622377	biological_process	291
putrescine biosynthetic process	Group	2	2	1	50	ODC1	0.0622377	biological_process	292
tyrosyl-tRNA aminoacylation	Group	2	2	1	50	YARS2	0.0622377	biological_process	293
leucyl-tRNA aminoacylation	Group	2	2	1	50	LARS2	0.0622377	biological_process	294
histidine biosynthetic process	Group	2	2	1	50	MTHFD2L	0.0622377	biological_process	295
methionine salvage	Group	2	2	1	50	ADI1	0.0622377	biological_process	296
dihydrobiopterin metabolic process	Group	2	2	1	50	QDPR	0.0622377	biological_process	297
NADP biosynthetic process	Group	2	2	1	50	ME1	0.0622377	biological_process	298
urate biosynthetic process	Group	2	2	1	50	NP	0.0622377	biological_process	299
glycosphingolipid catabolic process	Group	2	2	1	50	GLA	0.0622377	biological_process	300
DNA double-strand break processing	Group	2	2	1	50	UBE2N	0.0622377	biological_process	301
rRNA catabolic process	Group	2	2	1	50	DEDD2	0.0622377	biological_process	302
cytidine deamination	Group	2	2	1	50	PYCRL	0.0622377	biological_process	303
peptidyl-arginine N-methylation	Group	2	2	1	50	PRMT5	0.0622377	biological_process	304
peptidyl-arginine omega-N-methylation	Group	2	2	1	50	PRMT1	0.0622377	biological_process	305
peptidyl-diphthamide biosynthetic process from peptidyl-histidine	Group	2	2	1	50	DPH3	0.0622377	biological_process	306
internal protein amino acid acetylation	Group	2	2	1	50	ARD1A	0.0622377	biological_process	307
replication fork processing	Group	2	2	1	50	BLM	0.0622377	biological_process	308
transposition, DNA-mediated	Group	2	2	1	50	SETMAR	0.0622377	biological_process	309
nicotinamide riboside catabolic process	Group	2	2	1	50	NP	0.0622377	biological_process	310
regulation of long-term neuronal synaptic plasticity	Group	29	29	3	10	HRAS,EGR1,RAB11A	0.062621	biological_process	311
transcription, DNA-dependent	Group	29	29	3	10	GTF3C6,POLR2F,GTF3C4	0.062621	biological_process	312
liver development	Group	68	68	5	7	CCND1,CCNE1,CTNNB1,ICMT,PKM2	0.0638828	biological_process	313
positive regulation of cell proliferation	Group	332	332	16	4	HRAS,CCND1,ICMT,ODC1,TRAF5,FXN,SOX4,RECQL4,RPA1,C6orf66,NOLC1,SERTAD1,PDF,TIPIN,FGFR1OP,CIAO1	0.0639201	biological_process	314
intracellular transport	Group	48	48	4	8	RANBP2,APPBP2,RANBP3,DYNLL2	0.0646595	biological_process	315
double-strand break repair	Group	30	30	3	10	VCP,FEN1,TRIP13	0.0680068	biological_process	316
death	Group	14	14	2	14	NR4A2,SPR	0.0706838	biological_process	317
mRNA splice site selection	Group	14	14	2	14	SFRS1,SFRS5	0.0706838	biological_process	318
regulation of DNA replication	Group	14	14	2	14	PCNA,PPP2CA	0.0706838	biological_process	319
G1 phase of mitotic cell cycle	Group	14	14	2	14	TCF3,CDC23	0.0706838	biological_process	320
osteoclast differentiation	Group	14	14	2	14	CTNNB1,CHUK	0.0706838	biological_process	321
mRNA catabolic process	Group	14	14	2	14	PNPT1,LSM7	0.0706838	biological_process	322
skeletal muscle contraction	Group	14	14	2	14	CHUK,HOMER1	0.0706838	biological_process	323
response to protein stimulus	Group	50	50	4	8	EGR1,FOS,NR4A2,CFL1	0.0729214	biological_process	324
positive regulation of catalytic activity	Group	32	32	3	9	NR4A2,PSEN2,PPM2C	0.0793807	biological_process	325
vesicle organization	Group	15	15	2	13	FBXO5,CAV2	0.0798988	biological_process	326
oocyte maturation	Group	15	15	2	13	FBXO5,TRIP13	0.0798988	biological_process	327
ER-associated protein catabolic process	Group	15	15	2	13	VCP,NPLOC4	0.0798988	biological_process	328
phosphatidylinositol metabolic process	Group	15	15	2	13	PTPMT1,PIP4K2C	0.0798988	biological_process	329
post-translational protein modification	Group	95	95	6	6	UBE2D4,UBE2Z,UBE2N,UBE2D1,UBE2L3,UBE2J2	0.0807013	biological_process	330
chromatin remodeling	Group	52	52	4	7	BAZ1A,SMARCB1,TTF1,C14orf169	0.0816913	biological_process	331
response to organic cyclic substance	Group	142	142	8	5	PSMB2,CCND1,CCNE1,CTNNB1,FOS,BAG1,PEBP1,TAF2	0.0819226	biological_process	332
regulation of cell adhesion	Group	33	33	3	9	IL8,PPP2CA,PGP	0.0853571	biological_process	333
activation of NF-kappaB-inducing kinase activity	Group	16	16	2	12	TRAF6,MAP3K7	0.0894605	biological_process	334
male meiosis	Group	16	16	2	12	FANCA,TEX15	0.0894605	biological_process	335
myoblast differentiation	Group	16	16	2	12	CTNNB1,LGALS1	0.0894605	biological_process	336
glycogen biosynthetic process	Group	16	16	2	12	AGL,PHKG2	0.0894605	biological_process	337
RNA catabolic process	Group	16	16	2	12	PPP1R8,EXOSC7	0.0894605	biological_process	338
protein stabilization	Group	34	34	3	8	SOX4,MTRR,GTPBP4	0.0915184	biological_process	339
endoderm formation	Group	3	3	1	33	CTNNB1	0.0918901	biological_process	340
kinetochore assembly	Group	3	3	1	33	MIS12	0.0918901	biological_process	341
transcription initiation from RNA polymerase III promoter	Group	3	3	1	33	GTF3C4	0.0918901	biological_process	342
negative regulation of T-helper 2 cell differentiation	Group	3	3	1	33	SOCS5	0.0918901	biological_process	343
negative regulation of macroautophagy	Group	3	3	1	33	CLN3	0.0918901	biological_process	344
negative regulation of epidermal growth factor receptor signaling pathway	Group	3	3	1	33	NUP62	0.0918901	biological_process	345
negative regulation of Rac protein signal transduction	Group	3	3	1	33	STMN3	0.0918901	biological_process	346
negative regulation of mitosis	Group	3	3	1	33	AURKAIP1	0.0918901	biological_process	347
negative regulation of epithelial cell differentiation	Group	3	3	1	33	CCND1	0.0918901	biological_process	348
negative regulation of MHC class II biosynthetic process	Group	3	3	1	33	NFX1	0.0918901	biological_process	349
negative regulation of cholesterol transport	Group	3	3	1	33	NFKB1	0.0918901	biological_process	350
positive regulation of T-helper 1 cell differentiation	Group	3	3	1	33	SOCS5	0.0918901	biological_process	351
positive regulation of monocyte differentiation	Group	3	3	1	33	ACIN1	0.0918901	biological_process	352
positive regulation of histone modification	Group	3	3	1	33	UBE2N	0.0918901	biological_process	353
positive regulation of actin filament depolymerization	Group	3	3	1	33	CFL1	0.0918901	biological_process	354
regulation of RNA export from nucleus	Group	3	3	1	33	KHDRBS1	0.0918901	biological_process	355
regulation of translational initiation in response to stress	Group	3	3	1	33	EIF2S1	0.0918901	biological_process	356
regulation of growth rate	Group	3	3	1	33	PARP1	0.0918901	biological_process	357
regulation of retroviral genome replication	Group	3	3	1	33	IL8	0.0918901	biological_process	358
positive regulation of binding	Group	3	3	1	33	DPH3	0.0918901	biological_process	359
positive regulation of metalloenzyme activity	Group	3	3	1	33	FXN	0.0918901	biological_process	360
positive regulation of ubiquitin-protein ligase activity	Group	3	3	1	33	UBE2N	0.0918901	biological_process	361
peroxisome membrane biogenesis	Group	3	3	1	33	PEX3	0.0918901	biological_process	362
maturation of SSU-rRNA	Group	3	3	1	33	RPS14	0.0918901	biological_process	363
nuclear pore organization	Group	3	3	1	33	NUP98	0.0918901	biological_process	364
maintenance of DNA repeat elements	Group	3	3	1	33	MSH6	0.0918901	biological_process	365
protein import into peroxisome membrane	Group	3	3	1	33	PEX3	0.0918901	biological_process	366
glial cell fate determination	Group	3	3	1	33	CTNNB1	0.0918901	biological_process	367
protein localization to chromosome	Group	3	3	1	33	TEX15	0.0918901	biological_process	368
alanyl-tRNA aminoacylation	Group	3	3	1	33	AARSD1	0.0918901	biological_process	369
methionyl-tRNA aminoacylation	Group	3	3	1	33	MARS2	0.0918901	biological_process	370
threonyl-tRNA aminoacylation	Group	3	3	1	33	TARSL2	0.0918901	biological_process	371
UDP-N-acetylglucosamine biosynthetic process	Group	3	3	1	33	UAP1	0.0918901	biological_process	372
general transcription from RNA polymerase II promoter	Group	3	3	1	33	GTF2A2	0.0918901	biological_process	373
acyl-CoA biosynthetic process	Group	3	3	1	33	GCDH	0.0918901	biological_process	374
queuosine biosynthetic process	Group	3	3	1	33	QTRTD1	0.0918901	biological_process	375
pyruvate biosynthetic process	Group	3	3	1	33	PKM2	0.0918901	biological_process	376
glycosylceramide catabolic process	Group	3	3	1	33	GLA	0.0918901	biological_process	377
purine deoxyribonucleoside triphosphate catabolic process	Group	3	3	1	33	NUDT15	0.0918901	biological_process	378
GTP catabolic process	Group	3	3	1	33	RAB11A	0.0918901	biological_process	379
peptidyl-arginine methylation, to asymmetrical-dimethyl arginine	Group	3	3	1	33	PRMT1	0.0918901	biological_process	380
DNA dealkylation	Group	3	3	1	33	ALKBH1	0.0918901	biological_process	381
rRNA metabolic process	Group	3	3	1	33	MKI67IP	0.0918901	biological_process	382
dGTP metabolic process	Group	3	3	1	33	NP	0.0918901	biological_process	383
UMP biosynthetic process	Group	3	3	1	33	UMPS	0.0918901	biological_process	384
vesicle docking	Group	3	3	1	33	CAV2	0.0918901	biological_process	385
embryonic neurocranium morphogenesis	Group	3	3	1	33	NDST1	0.0918901	biological_process	386
ovarian follicle rupture	Group	3	3	1	33	NRIP1	0.0918901	biological_process	387
RNA localization	Group	3	3	1	33	IGF2BP1	0.0918901	biological_process	388
polysaccharide biosynthetic process	Group	3	3	1	33	NDST1	0.0918901	biological_process	389
proprioception	Group	3	3	1	33	FXN	0.0918901	biological_process	390
response to UV-A	Group	3	3	1	33	CCND1	0.0918901	biological_process	391
response to purine	Group	3	3	1	33	CCNE1	0.0918901	biological_process	392
endocytosis	Group	147	147	8	5	HRAS,EPS15L1,CAV2,AP1G1,RABEP1,CLINT1,RAB18,MICALL2	0.0953382	biological_process	393
response to organic substance	Group	123	123	7	5	CCND1,CHUK,CASP6,PKM2,PEBP1,PPP2CA,SPR	0.0956314	biological_process	394
cellular metabolic process	Group	55	55	4	7	EIF2B4,EIF2B1,BLM,GALE	0.0957668	biological_process	395
response to cytokine stimulus	Group	77	77	5	6	MCL1,CCNE1,CTNNB1,FOS,CASP6	0.096731	biological_process	396
chromosome organization	Group	35	35	3	8	BLM,RPA1,PELO	0.0978583	biological_process	397
fat cell differentiation	Group	35	35	3	8	METTL8,CCND1,TRIM32	0.0978583	biological_process	398
vesicle-mediated transport	Group	223	223	11	4	AP4B1,SCFD2,VAMP8,TRAPPC10,RINT1,AP1G1,RAB2A,GGA2,SAR1B,C14orf108,SAR1A	0.0978783	biological_process	399
negative regulation of transport	Group	17	17	2	11	DDI2,YRDC	0.0993376	biological_process	400
induction of apoptosis via death domain receptors	Group	17	17	2	11	BID,DEDD2	0.0993376	biological_process	401
negative regulation of MAP kinase activity	Group	17	17	2	11	SPRY2,NUP62	0.0993376	biological_process	402
pentose-phosphate shunt	Group	17	17	2	11	N-pac,RPIA	0.0993376	biological_process	403
nitric oxide biosynthetic process	Group	17	17	2	11	NQO1,SPR	0.0993376	biological_process	404
pyrimidine nucleotide biosynthetic process	Group	17	17	2	11	CTPS,UMPS	0.0993376	biological_process	405
positive regulation of apoptosis	Group	149	149	8	5	BID,CASP6,DFFA,SIVA1,SOX4,PSEN2,DDX20,BCLAF1	0.101034	biological_process	406
somitogenesis	Group	36	36	3	8	ZEB2,PSEN2,TBX18	0.10437	biological_process	407
response to calcium ion	Group	57	57	4	7	CCND1,AQP3,PEBP1,PEF1	0.10574	biological_process	408
negative regulation of protein amino acid phosphorylation	Group	18	18	2	11	PEBP1,PSEN2	0.109501	biological_process	409
heme biosynthetic process	Group	18	18	2	11	ALAS1,FXN	0.109501	biological_process	410
midbrain development	Group	18	18	2	11	SMAD1,NDST1	0.109501	biological_process	411
protein oligomerization	Group	37	37	3	8	RRM2,BLM,CAV2	0.111048	biological_process	412
histone deacetylation	Group	19	19	2	10	PHB,RBM14	0.119922	biological_process	413
skeletal muscle fiber development	Group	19	19	2	10	HOMER1,CAV2	0.119922	biological_process	414
myelin assembly	Group	4	4	1	25	PMP22	0.120606	biological_process	415
neural fold formation	Group	4	4	1	25	CFL1	0.120606	biological_process	416
tubulin complex assembly	Group	4	4	1	25	TCP1alpha	0.120606	biological_process	417
transcriptional preinitiation complex assembly	Group	4	4	1	25	GTF2A2	0.120606	biological_process	418
protein heterotetramerization	Group	4	4	1	25	PDSS1	0.120606	biological_process	419
negative regulation of anti-apoptosis	Group	4	4	1	25	TNFAIP8	0.120606	biological_process	420
negative regulation of tyrosine phosphorylation of Stat3 protein	Group	4	4	1	25	PPP2CA	0.120606	biological_process	421
negative regulation of RNA splicing	Group	4	4	1	25	RPS26	0.120606	biological_process	422
primary microRNA processing	Group	4	4	1	25	SMAD1	0.120606	biological_process	423
positive regulation of T-helper 2 cell differentiation	Group	4	4	1	25	RARA	0.120606	biological_process	424
positive regulation of striated muscle cell differentiation	Group	4	4	1	25	EPC1	0.120606	biological_process	425
positive regulation of coagulation	Group	4	4	1	25	PSEN2	0.120606	biological_process	426
positive regulation of interleukin-4 production	Group	4	4	1	25	RARA	0.120606	biological_process	427
positive regulation of calcium ion transport via store-operated calcium channel activity	Group	4	4	1	25	HOMER1	0.120606	biological_process	428
regulation of mitochondrial depolarization	Group	4	4	1	25	GCLM	0.120606	biological_process	429
regulation of Rac GTPase activity	Group	4	4	1	25	STMN3	0.120606	biological_process	430
regulation of cellular respiration	Group	4	4	1	25	CISD1	0.120606	biological_process	431
SMAD protein signal transduction	Group	4	4	1	25	FOS	0.120606	biological_process	432
dosage compensation, by inactivation of X chromosome	Group	4	4	1	25	CTCF	0.120606	biological_process	433
microtubule anchoring	Group	4	4	1	25	FGFR1OP	0.120606	biological_process	434
positive regulation of lyase activity	Group	4	4	1	25	FXN	0.120606	biological_process	435
positive regulation of helicase activity	Group	4	4	1	25	MSH6	0.120606	biological_process	436
cellular response to nutrient	Group	4	4	1	25	CCNE1	0.120606	biological_process	437
female meiosis I	Group	4	4	1	25	TRIP13	0.120606	biological_process	438
re-entry into mitotic cell cycle	Group	4	4	1	25	CCND1	0.120606	biological_process	439
apoptotic chromosome condensation	Group	4	4	1	25	ACIN1	0.120606	biological_process	440
hemopoietic progenitor cell differentiation	Group	4	4	1	25	PSEN2	0.120606	biological_process	441
osteoblast fate commitment	Group	4	4	1	25	SMAD1	0.120606	biological_process	442
endodermal cell fate commitment	Group	4	4	1	25	CTNNB1	0.120606	biological_process	443
retrograde protein transport, ER to cytosol	Group	4	4	1	25	VCP	0.120606	biological_process	444
pentose-phosphate shunt, non-oxidative branch	Group	4	4	1	25	RPIA	0.120606	biological_process	445
lipoxygenase pathway	Group	4	4	1	25	HPGD	0.120606	biological_process	446
spermine biosynthetic process	Group	4	4	1	25	AMD1	0.120606	biological_process	447
glutamyl-tRNA aminoacylation	Group	4	4	1	25	EARS2	0.120606	biological_process	448
S-adenosylmethioninamine metabolic process	Group	4	4	1	25	ICMT	0.120606	biological_process	449
de novo' pyrimidine base biosynthetic process	Group	4	4	1	25	UMPS	0.120606	biological_process	450
tetrahydrobiopterin metabolic process	Group	4	4	1	25	SPR	0.120606	biological_process	451
DNA strand elongation during DNA replication	Group	4	4	1	25	RFC3	0.120606	biological_process	452
galactosylceramide metabolic process	Group	4	4	1	25	CLN3	0.120606	biological_process	453
glucosylceramide metabolic process	Group	4	4	1	25	CLN3	0.120606	biological_process	454
protein repair	Group	4	4	1	25	SEPX1	0.120606	biological_process	455
DNA duplex unwinding	Group	4	4	1	25	SUPV3L1	0.120606	biological_process	456
tRNA splicing, via endonucleolytic cleavage and ligation	Group	4	4	1	25	TSEN34	0.120606	biological_process	457
purine salvage	Group	4	4	1	25	NP	0.120606	biological_process	458
exocrine pancreas development	Group	4	4	1	25	SOX4	0.120606	biological_process	459
embryonic arm morphogenesis	Group	4	4	1	25	CTNNB1	0.120606	biological_process	460
antral ovarian follicle growth	Group	4	4	1	25	CCNE1	0.120606	biological_process	461
mesonephros development	Group	4	4	1	25	WT1	0.120606	biological_process	462
arginine transport	Group	4	4	1	25	CLN3	0.120606	biological_process	463
voluntary musculoskeletal movement	Group	4	4	1	25	SPR	0.120606	biological_process	464
response to insecticide	Group	4	4	1	25	NR4A2	0.120606	biological_process	465
response to nitrosative stress	Group	4	4	1	25	GCLM	0.120606	biological_process	466
response to retinoic acid	Group	60	60	4	6	C14orf104,RARA,AQP3,GDAP1	0.121534	biological_process	467
cytokinesis	Group	39	39	3	7	BIN3,CFL1,ANLN	0.124872	biological_process	468
cellular response to extracellular stimulus	Group	20	20	2	10	FOS,NR4A2	0.130575	biological_process	469
protein export from nucleus	Group	20	20	2	10	NUP214,NXT1	0.130575	biological_process	470
dopamine metabolic process	Group	20	20	2	10	NR4A2,SPR	0.130575	biological_process	471
mitochondrion organization	Group	41	41	3	7	FXN,BCS1L,CAV2	0.139278	biological_process	472
negative regulation of proteolysis	Group	21	21	2	9	CLN3,RAB23	0.141435	biological_process	473
DNA damage response, signal transduction resulting in induction of apoptosis	Group	21	21	2	9	CHEK2,MSH6	0.141435	biological_process	474
cell cycle checkpoint	Group	21	21	2	9	CCNE2,RBBP8	0.141435	biological_process	475
homeostasis of number of cells within a tissue	Group	21	21	2	9	RPA1,TEX15	0.141435	biological_process	476
glutamine metabolic process	Group	21	21	2	9	CTPS,PFAS	0.141435	biological_process	477
response to X-ray	Group	21	21	2	9	CCND1,BLM	0.141435	biological_process	478
response to drug	Group	295	295	13	4	CCND1,CCNE1,FOS,CHUK,BAG1,SMAD1,EI24,TCF3,NP,PEBP1,GCLM,RAD54B,CTPS	0.144707	biological_process	479
carbohydrate metabolic process	Group	296	296	13	4	MRFAP1L1,NANP,ME1,IDH3A,AGL,ALDH1B1,GLA,PGM2,GNE,GALE,RPE,PGP,PHKG2	0.147273	biological_process	480
assembly of spliceosomal tri-snRNP	Group	5	5	1	20	DDX20	0.148415	biological_process	481
negative regulation of nitric oxide biosynthetic process	Group	5	5	1	20	GLA	0.148415	biological_process	482
methylation-dependent chromatin silencing	Group	5	5	1	20	HELLS	0.148415	biological_process	483
negative regulation of organ growth	Group	5	5	1	20	FXN	0.148415	biological_process	484
positive regulation of Rac protein signal transduction	Group	5	5	1	20	HRAS	0.148415	biological_process	485
positive regulation of epithelial cell differentiation	Group	5	5	1	20	CTNNB1	0.148415	biological_process	486
intra-S DNA damage checkpoint	Group	5	5	1	20	TIPIN	0.148415	biological_process	487
regulation of keratinocyte differentiation	Group	5	5	1	20	AQP3	0.148415	biological_process	488
regulation of chromosome organization	Group	5	5	1	20	PRR6	0.148415	biological_process	489
lysosomal lumen acidification	Group	5	5	1	20	CLN3	0.148415	biological_process	490
B cell lineage commitment	Group	5	5	1	20	TCF3	0.148415	biological_process	491
neutrophil activation	Group	5	5	1	20	IL8	0.148415	biological_process	492
cytoplasm organization	Group	5	5	1	20	RRN3	0.148415	biological_process	493
cerebral cortex GABAergic interneuron differentiation	Group	5	5	1	20	DLX1	0.148415	biological_process	494
pro-B cell differentiation	Group	5	5	1	20	SOX4	0.148415	biological_process	495
ribosomal protein import into nucleus	Group	5	5	1	20	IPO4	0.148415	biological_process	496
ribose phosphate metabolic process	Group	5	5	1	20	RPIA	0.148415	biological_process	497
spermidine biosynthetic process	Group	5	5	1	20	AMD1	0.148415	biological_process	498
L-phenylalanine metabolic process	Group	5	5	1	20	SPR	0.148415	biological_process	499
adenine metabolic process	Group	5	5	1	20	AK2	0.148415	biological_process	500
protein amino acid geranylgeranylation	Group	5	5	1	20	RABGGTB	0.148415	biological_process	501
fatty acid alpha-oxidation	Group	5	5	1	20	PEX13	0.148415	biological_process	502
depyrimidination	Group	5	5	1	20	TDG	0.148415	biological_process	503
protein maturation by protein folding	Group	5	5	1	20	AIP	0.148415	biological_process	504
protein refolding	Group	5	5	1	20	HSP90AA1	0.148415	biological_process	505
peptidyl-methionine modification	Group	5	5	1	20	PDF	0.148415	biological_process	506
base-excision repair, gap-filling	Group	5	5	1	20	PCNA	0.148415	biological_process	507
immunoglobulin V(D)J recombination	Group	5	5	1	20	TCF3	0.148415	biological_process	508
pyrimidine dimer repair	Group	5	5	1	20	POLH	0.148415	biological_process	509
purine nucleoside metabolic process	Group	5	5	1	20	NP	0.148415	biological_process	510
de novo' IMP biosynthetic process	Group	5	5	1	20	PFAS	0.148415	biological_process	511
N-acetylneuraminate metabolic process	Group	5	5	1	20	GNE	0.148415	biological_process	512
embryonic viscerocranium morphogenesis	Group	5	5	1	20	NDST1	0.148415	biological_process	513
ovulation	Group	5	5	1	20	NRIP1	0.148415	biological_process	514
retroviral genome replication	Group	5	5	1	20	SMARCB1	0.148415	biological_process	515
response to methylmercury	Group	5	5	1	20	CCNE1	0.148415	biological_process	516
negative regulation of cell proliferation	Group	324	324	14	4	CHERP,IL8,SMAD1,PHB,CDC6,PMP22,ING1,ING5,SMARCB1,CAV2,GTPBP4,NUP62,UTP20,WDR6	0.149252	biological_process	517
amino acid metabolic process	Group	65	65	4	6	PTS,CLN3,QDPR,PEPD	0.149907	biological_process	518
positive regulation of T cell activation	Group	22	22	2	9	TRAF6,MAP3K7	0.152477	biological_process	519
regulation of endocytosis	Group	22	22	2	9	SNX17,RAB5C	0.152477	biological_process	520
T cell differentiation in the thymus	Group	22	22	2	9	CTNNB1,JMJD6	0.152477	biological_process	521
mRNA export from nucleus	Group	22	22	2	9	NUP214,RAE1	0.152477	biological_process	522
response to reactive oxygen species	Group	22	22	2	9	NUDT15,SFRS10	0.152477	biological_process	523
regulation of signal transduction	Group	66	66	4	6	SPRY2,KHDRBS1,NUP62,CNKSR3	0.155863	biological_process	524
response to toxin	Group	66	66	4	6	FOS,CHUK,NQO1,PEBP1	0.155863	biological_process	525
sensory perception of sound	Group	166	166	8	4	TIMM8B,SPRY2,BCS1L,PMP22,WDR1,SIX1,TIMM8A,TIMM10	0.156745	biological_process	526
learning or memory	Group	44	44	3	6	EGR1,CALB1,PSEN2	0.161857	biological_process	527
vesicle docking during exocytosis	Group	23	23	2	8	SCFD2,RABEPK	0.163681	biological_process	528
response to hormone stimulus	Group	68	68	4	5	CTNNB1,ME1,AGL,RBM14	0.168033	biological_process	529
neural crest cell migration	Group	24	24	2	8	CFL1,ZEB2	0.175023	biological_process	530
protein import into nucleus, translocation	Group	24	24	2	8	TNPO1,POLA2	0.175023	biological_process	531
purine nucleotide biosynthetic process	Group	24	24	2	8	MTHFD2L,PFAS	0.175023	biological_process	532
hippocampus development	Group	24	24	2	8	ZEB2,DLX1	0.175023	biological_process	533
zinc ion transport	Group	24	24	2	8	SLC39A6,SLC30A1	0.175023	biological_process	534
negative regulation of oligodendrocyte differentiation	Group	6	6	1	16	DLX1	0.175345	biological_process	535
negative regulation of DNA recombination	Group	6	6	1	16	MSH6	0.175345	biological_process	536
positive regulation of cyclin-dependent protein kinase activity	Group	6	6	1	16	CCND1	0.175345	biological_process	537
DNA damage response, signal transduction by p53 class mediator resulting in cell cycle arrest	Group	6	6	1	16	TRIAP1	0.175345	biological_process	538
regulation of protein import into nucleus	Group	6	6	1	16	NOLC1	0.175345	biological_process	539
regulation of immunoglobulin secretion	Group	6	6	1	16	TRAF6	0.175345	biological_process	540
Rab protein signal transduction	Group	6	6	1	16	RAB2A	0.175345	biological_process	541
regulation of intracellular pH	Group	6	6	1	16	CLN3	0.175345	biological_process	542
T cell activation during immune response	Group	6	6	1	16	PSEN2	0.175345	biological_process	543
macroautophagy	Group	6	6	1	16	CLN3	0.175345	biological_process	544
mitotic metaphase	Group	6	6	1	16	FBXO5	0.175345	biological_process	545
cell morphogenesis involved in neuron differentiation	Group	6	6	1	16	SPR	0.175345	biological_process	546
apoptotic cell clearance	Group	6	6	1	16	JMJD6	0.175345	biological_process	547
cytoplasmic microtubule organization	Group	6	6	1	16	STMN3	0.175345	biological_process	548
ventricular cardiac muscle cell differentiation	Group	6	6	1	16	RARA	0.175345	biological_process	549
anterograde axon cargo transport	Group	6	6	1	16	KIF1A	0.175345	biological_process	550
norepinephrine metabolic process	Group	6	6	1	16	SPR	0.175345	biological_process	551
sphingomyelin metabolic process	Group	6	6	1	16	CLN3	0.175345	biological_process	552
N-terminal protein amino acid modification	Group	6	6	1	16	PDF	0.175345	biological_process	553
alternative nuclear mRNA splicing, via spliceosome	Group	6	6	1	16	RSRC1	0.175345	biological_process	554
beta-amyloid metabolic process	Group	6	6	1	16	PSEN2	0.175345	biological_process	555
deoxyribonucleoside diphosphate metabolic process	Group	6	6	1	16	RRM2	0.175345	biological_process	556
midgut development	Group	6	6	1	16	CTNNB1	0.175345	biological_process	557
dorsal-ventral axis specification	Group	6	6	1	16	CTNNB1	0.175345	biological_process	558
protein complex localization	Group	6	6	1	16	FKBP4	0.175345	biological_process	559
conditioned taste aversion	Group	6	6	1	16	FOS	0.175345	biological_process	560
response to hydroperoxide	Group	6	6	1	16	CHUK	0.175345	biological_process	561
gamete generation	Group	46	46	3	6	SPIN2B,SMAD1,ZNF148	0.177478	biological_process	562
epithelial to mesenchymal transition	Group	25	25	2	8	CTNNB1,HNRNPAB	0.186486	biological_process	563
cell fate determination	Group	25	25	2	8	MCL1,CTNNB1	0.186486	biological_process	564
ureteric bud development	Group	25	25	2	8	RARA,SIX1	0.186486	biological_process	565
proximal-distal pattern formation	Group	25	25	2	8	CTNNB1,DLX1	0.186486	biological_process	566
response to amino acid stimulus	Group	25	25	2	8	CHUK,CFL1	0.186486	biological_process	567
myelination	Group	48	48	3	6	EIF2B4,PMP22,NAB2	0.193491	biological_process	568
embryonic digit morphogenesis	Group	26	26	2	7	CTNNB1,RAB23	0.198048	biological_process	569
response to cold	Group	26	26	2	7	FOS,VGF	0.198048	biological_process	570
mesodermal cell fate commitment	Group	7	7	1	14	SMAD1	0.201425	biological_process	571
clathrin coat assembly	Group	7	7	1	14	CLINT1	0.201425	biological_process	572
mitochondrial respiratory chain complex I assembly	Group	7	7	1	14	BCS1L	0.201425	biological_process	573
ribosomal small subunit assembly	Group	7	7	1	14	RPS14	0.201425	biological_process	574
regulation of anti-apoptosis	Group	7	7	1	14	RARA	0.201425	biological_process	575
negative regulation of chondrocyte differentiation	Group	7	7	1	14	CTNNB1	0.201425	biological_process	576
negative regulation of interferon-gamma production	Group	7	7	1	14	RARA	0.201425	biological_process	577
positive regulation of alpha-beta T cell differentiation	Group	7	7	1	14	NP	0.201425	biological_process	578
positive regulation of epidermal growth factor receptor signaling pathway	Group	7	7	1	14	NUP62	0.201425	biological_process	579
positive regulation of interleukin-6 biosynthetic process	Group	7	7	1	14	TRAF6	0.201425	biological_process	580
regulation of S phase	Group	7	7	1	14	TIPIN	0.201425	biological_process	581
regulation of meiosis	Group	7	7	1	14	FBXO5	0.201425	biological_process	582
traversing start control point of mitotic cell cycle	Group	7	7	1	14	CDC6	0.201425	biological_process	583
regulation of DNA repair	Group	7	7	1	14	POLH	0.201425	biological_process	584
DNA damage response, signal transduction	Group	7	7	1	14	CHEK2	0.201425	biological_process	585
glucocorticoid receptor signaling pathway	Group	7	7	1	14	RBM14	0.201425	biological_process	586
entrainment of circadian clock	Group	7	7	1	14	BHLHB3	0.201425	biological_process	587
regulation of epidermis development	Group	7	7	1	14	NAB2	0.201425	biological_process	588
regulation of respiratory gaseous exchange	Group	7	7	1	14	NR4A2	0.201425	biological_process	589
androgen biosynthetic process	Group	7	7	1	14	NSUN2	0.201425	biological_process	590
actin nucleation	Group	7	7	1	14	ARPC4	0.201425	biological_process	591
pachytene	Group	7	7	1	14	TRIP13	0.201425	biological_process	592
rRNA modification	Group	7	7	1	14	TFB2M	0.201425	biological_process	593
microtubule depolymerization	Group	7	7	1	14	STMN3	0.201425	biological_process	594
Schwann cell differentiation	Group	7	7	1	14	NAB2	0.201425	biological_process	595
nuclear export	Group	7	7	1	14	LSG1	0.201425	biological_process	596
dopamine biosynthetic process	Group	7	7	1	14	NR4A2	0.201425	biological_process	597
serotonin metabolic process	Group	7	7	1	14	SPR	0.201425	biological_process	598
valine metabolic process	Group	7	7	1	14	N-pac	0.201425	biological_process	599
lipopolysaccharide biosynthetic process	Group	7	7	1	14	GNE	0.201425	biological_process	600
protein amino acid sulfation	Group	7	7	1	14	NDST1	0.201425	biological_process	601
mitotic recombination	Group	7	7	1	14	RAD54B	0.201425	biological_process	602
tetrapyrrole biosynthetic process	Group	7	7	1	14	ALAS1	0.201425	biological_process	603
malate metabolic process	Group	7	7	1	14	ME1	0.201425	biological_process	604
morphogenesis of an epithelial sheet	Group	7	7	1	14	CHUK	0.201425	biological_process	605
male sex differentiation	Group	7	7	1	14	FKBP4	0.201425	biological_process	606
penile erection	Group	7	7	1	14	VGF	0.201425	biological_process	607
response to UV-C	Group	7	7	1	14	POLH	0.201425	biological_process	608
organ regeneration	Group	49	49	3	6	CCND1,CCNE1,PKM2	0.201627	biological_process	609
male gonad development	Group	49	49	3	6	WT1,FANCA,MEA1	0.201627	biological_process	610
negative regulation of signal transduction	Group	74	74	4	5	SOCS6,SOCS4,SOCS5,PAK1IP1	0.206372	biological_process	611
protein amino acid dephosphorylation	Group	152	152	7	4	CDC25A,PTPN2,PPP2CA,PPM2C,DUSP14,RNGTT,PTPMT1	0.206844	biological_process	612
regulation of neuronal synaptic plasticity	Group	27	27	2	7	BHLHB3,VGF	0.209694	biological_process	613
endoplasmic reticulum unfolded protein response	Group	27	27	2	7	CCND1,VCP	0.209694	biological_process	614
cardiac muscle contraction	Group	27	27	2	7	SFRS1,PSEN2	0.209694	biological_process	615
response to progesterone stimulus	Group	27	27	2	7	CCNE1,FOS	0.209694	biological_process	616
receptor-mediated endocytosis	Group	51	51	3	5	CLN3,SNX17,RABEPK	0.21813	biological_process	617
positive regulation of neuron apoptosis	Group	28	28	2	7	CASP6,NQO1	0.221405	biological_process	618
nucleoside metabolic process	Group	28	28	2	7	NP,UMPS	0.221405	biological_process	619
membrane organization	Group	52	52	3	5	CLN3,SEC13,SAR1B	0.226483	biological_process	620
xenobiotic metabolic process	Group	52	52	3	5	AKR1C1,NQO1,AIP	0.226483	biological_process	621
SMAD protein complex assembly	Group	8	8	1	12	SMAD1	0.22668	biological_process	622
formation of translation initiation complex	Group	8	8	1	12	EIF3G	0.22668	biological_process	623
negative regulation of protein ubiquitination	Group	8	8	1	12	GTPBP4	0.22668	biological_process	624
negative regulation of protein secretion	Group	8	8	1	12	DPH3	0.22668	biological_process	625
positive regulation of interleukin-12 biosynthetic process	Group	8	8	1	12	TRAF6	0.22668	biological_process	626
regulation of epidermal growth factor receptor activity	Group	8	8	1	12	PSEN2	0.22668	biological_process	627
regulation of synaptic transmission, GABAergic	Group	8	8	1	12	HRAS	0.22668	biological_process	628
regulation of dopamine metabolic process	Group	8	8	1	12	NR4A2	0.22668	biological_process	629
regulation of transcription from RNA polymerase III promoter	Group	8	8	1	12	POLR3G	0.22668	biological_process	630
regulation of glycolysis	Group	8	8	1	12	ECD	0.22668	biological_process	631
Notch receptor processing	Group	8	8	1	12	PSEN2	0.22668	biological_process	632
regulation of protein transport	Group	8	8	1	12	RAB11A	0.22668	biological_process	633
negative regulation of cell size	Group	8	8	1	12	CFL1	0.22668	biological_process	634
positive regulation of oxidoreductase activity	Group	8	8	1	12	FXN	0.22668	biological_process	635
cerebral cortex cell migration	Group	8	8	1	12	PEX13	0.22668	biological_process	636
cell proliferation in forebrain	Group	8	8	1	12	ZEB2	0.22668	biological_process	637
early endosome to late endosome transport	Group	8	8	1	12	SNX16	0.22668	biological_process	638
galactose metabolic process	Group	8	8	1	12	GALE	0.22668	biological_process	639
proline biosynthetic process	Group	8	8	1	12	PYCRL	0.22668	biological_process	640
heparan sulfate proteoglycan biosynthetic process	Group	8	8	1	12	NDST1	0.22668	biological_process	641
protein amino acid acetylation	Group	8	8	1	12	ING5	0.22668	biological_process	642
deoxyribonucleotide metabolic process	Group	8	8	1	12	RRM2	0.22668	biological_process	643
deoxyribonucleotide biosynthetic process	Group	8	8	1	12	RRM2	0.22668	biological_process	644
vitamin D metabolic process	Group	8	8	1	12	CALB1	0.22668	biological_process	645
determination of adult life span	Group	8	8	1	12	MSH6	0.22668	biological_process	646
spinal cord dorsal-ventral patterning	Group	8	8	1	12	RAB23	0.22668	biological_process	647
spermatogenesis	Group	353	353	14	3	SPATA2,GSR,RAD23B,GOLGA3,MEA1,DNAJA1,MYCBP,KHDRBS3,RUVBL1,TRIM27,HSF2,TEX15,WDR33,PAFAH1B3	0.229875	biological_process	648
negative regulation of translation	Group	29	29	2	6	IGF2BP1,EIF4A3	0.233167	biological_process	649
glutathione metabolic process	Group	29	29	2	6	GSR,GCLM	0.233167	biological_process	650
response to estradiol stimulus	Group	79	79	4	5	RARA,CCND1,CCNE1,CASP6	0.24004	biological_process	651
positive regulation of osteoblast differentiation	Group	30	30	2	6	CTNNB1,SMAD1	0.244964	biological_process	652
hemopoiesis	Group	80	80	4	5	CTNNB1,SH2B3,CIAPIN1,RPA1	0.246923	biological_process	653
negative regulation of Ras protein signal transduction	Group	9	9	1	11	NUP62	0.251138	biological_process	654
positive regulation of B cell differentiation	Group	9	9	1	11	NP	0.251138	biological_process	655
positive regulation of glycogen biosynthetic process	Group	9	9	1	11	DYRK2	0.251138	biological_process	656
positive regulation of proteolysis	Group	9	9	1	11	AURKAIP1	0.251138	biological_process	657
positive regulation of lipid metabolic process	Group	9	9	1	11	NFKB1	0.251138	biological_process	658
regulation of smoothened signaling pathway	Group	9	9	1	11	RAB23	0.251138	biological_process	659
G1-S transition checkpoint	Group	9	9	1	11	HUS1	0.251138	biological_process	660
regulation of osteoblast differentiation	Group	9	9	1	11	CTNNB1	0.251138	biological_process	661
regulation of cytoskeleton organization	Group	9	9	1	11	STMN3	0.251138	biological_process	662
regulation of protein ubiquitination	Group	9	9	1	11	UBQLN1	0.251138	biological_process	663
regulation of DNA recombination	Group	9	9	1	11	KPNA1	0.251138	biological_process	664
regulation of mRNA processing	Group	9	9	1	11	SAFB	0.251138	biological_process	665
mRNA stabilization	Group	9	9	1	11	ELAVL1	0.251138	biological_process	666
metabotropic glutamate receptor signaling pathway	Group	9	9	1	11	HOMER1	0.251138	biological_process	667
second-messenger-mediated signaling	Group	9	9	1	11	PPP2CA	0.251138	biological_process	668
response to dietary excess	Group	9	9	1	11	VGF	0.251138	biological_process	669
regulation of neurotransmitter levels	Group	9	9	1	11	PEBP1	0.251138	biological_process	670
cellular glucose homeostasis	Group	9	9	1	11	SOCS6	0.251138	biological_process	671
cellular metal ion homeostasis	Group	9	9	1	11	ASNA1	0.251138	biological_process	672
cellular zinc ion homeostasis	Group	9	9	1	11	SLC30A1	0.251138	biological_process	673
regulation of binding	Group	9	9	1	11	BLM	0.251138	biological_process	674
endoplasmic reticulum organization	Group	9	9	1	11	CAV2	0.251138	biological_process	675
central nervous system neuron differentiation	Group	9	9	1	11	NR4A2	0.251138	biological_process	676
Leydig cell differentiation	Group	9	9	1	11	CCND1	0.251138	biological_process	677
cellular protein localization	Group	9	9	1	11	CTNNB1	0.251138	biological_process	678
cytokine secretion	Group	9	9	1	11	LCP2	0.251138	biological_process	679
peptide biosynthetic process	Group	9	9	1	11	MRPS26	0.251138	biological_process	680
ubiquinone biosynthetic process	Group	9	9	1	11	PDSS1	0.251138	biological_process	681
cellular response to reactive oxygen species	Group	9	9	1	11	FOS	0.251138	biological_process	682
brain morphogenesis	Group	9	9	1	11	PSEN2	0.251138	biological_process	683
segment specification	Group	9	9	1	11	MLLT3	0.251138	biological_process	684
entry of virus into host cell	Group	9	9	1	11	WWP2	0.251138	biological_process	685
protein maturation	Group	9	9	1	11	PSEN2	0.251138	biological_process	686
mechanosensory behavior	Group	9	9	1	11	PMP22	0.251138	biological_process	687
response to magnesium ion	Group	9	9	1	11	CCND1	0.251138	biological_process	688
erythrocyte differentiation	Group	31	31	2	6	ACIN1,RPS14	0.256783	biological_process	689
protein heterooligomerization	Group	82	82	4	4	HRAS,CASP8,CTNNB1,MED24	0.260813	biological_process	690
forebrain development	Group	82	82	4	4	CTNNB1,NR2F2,PSEN2,NDST1	0.260813	biological_process	691
response to oxidative stress	Group	137	137	6	4	NFKB1,NQO1,PSMB5,TXNRD1,PEBP1,GCLM	0.266505	biological_process	692
negative regulation of transcription, DNA-dependent	Group	110	110	5	4	CTNNB1,NFKB1,DNAJB6,HNRNPAB,DMAP1	0.268592	biological_process	693
cell fate specification	Group	32	32	2	6	CTNNB1,PSEN2	0.26861	biological_process	694
nucleotide-excision repair	Group	32	32	2	6	RAD23B,GTF2H5	0.26861	biological_process	695
negative regulation of cell-cell adhesion	Group	10	10	1	10	GTPBP4	0.274824	biological_process	696
negative regulation of MAPKKK cascade	Group	10	10	1	10	PEBP1	0.274824	biological_process	697
gene silencing	Group	10	10	1	10	UTP3	0.274824	biological_process	698
negative regulation of tumor necrosis factor production	Group	10	10	1	10	RARA	0.274824	biological_process	699
positive regulation of immune system process	Group	10	10	1	10	AQP3	0.274824	biological_process	700
positive regulation of dendrite morphogenesis	Group	10	10	1	10	SMAD1	0.274824	biological_process	701
complement activation, lectin pathway	Group	10	10	1	10	CD69	0.274824	biological_process	702
positive regulation of JUN kinase activity	Group	10	10	1	10	ZEB2	0.274824	biological_process	703
regulation of mRNA stability	Group	10	10	1	10	HNRNPC	0.274824	biological_process	704
positive regulation of transferase activity	Group	10	10	1	10	FXN	0.274824	biological_process	705
lymphocyte proliferation	Group	10	10	1	10	HELLS	0.274824	biological_process	706
synapsis	Group	10	10	1	10	TEX15	0.274824	biological_process	707
meiotic prophase I	Group	10	10	1	10	FBXO5	0.274824	biological_process	708
apoptotic nuclear changes	Group	10	10	1	10	DEDD2	0.274824	biological_process	709
endosome organization	Group	10	10	1	10	RAB5C	0.274824	biological_process	710
intermediate filament organization	Group	10	10	1	10	DNAJB6	0.274824	biological_process	711
forebrain neuron differentiation	Group	10	10	1	10	DLX1	0.274824	biological_process	712
monocyte differentiation	Group	10	10	1	10	IFI16	0.274824	biological_process	713
SRP-dependent cotranslational protein targeting to membrane	Group	10	10	1	10	SRP19	0.274824	biological_process	714
RNA export from nucleus	Group	10	10	1	10	NXT1	0.274824	biological_process	715
cholesterol catabolic process	Group	10	10	1	10	SNX17	0.274824	biological_process	716
sphingolipid biosynthetic process	Group	10	10	1	10	LASS6	0.274824	biological_process	717
glycogen catabolic process	Group	10	10	1	10	AGL	0.274824	biological_process	718
fatty acid catabolic process	Group	10	10	1	10	ACOT7	0.274824	biological_process	719
protein sumoylation	Group	10	10	1	10	SUMO3	0.274824	biological_process	720
DNA topological change	Group	10	10	1	10	TOP3B	0.274824	biological_process	721
oxidative phosphorylation	Group	10	10	1	10	FXN	0.274824	biological_process	722
intestinal cholesterol absorption	Group	10	10	1	10	AKR1C1	0.274824	biological_process	723
bile acid and bile salt transport	Group	10	10	1	10	AKR1C1	0.274824	biological_process	724
sleep	Group	10	10	1	10	FOS	0.274824	biological_process	725
response to activity	Group	10	10	1	10	PEBP1	0.274824	biological_process	726
UV protection	Group	10	10	1	10	FEN1	0.274824	biological_process	727
response to cAMP	Group	58	58	3	5	FOS,PEBP1,VGF	0.277656	biological_process	728
activation of JUN kinase activity	Group	33	33	2	6	MAP3K5,MAP3K2	0.280433	biological_process	729
DNA metabolic process	Group	59	59	3	5	PARP1,FANCM,TOP3B	0.286308	biological_process	730
negative regulation of I-kappaB kinase-NF-kappaB cascade	Group	11	11	1	9	C9orf89	0.29776	biological_process	731
mitotic cell cycle spindle assembly checkpoint	Group	11	11	1	9	MAD2L2	0.29776	biological_process	732
negative regulation of multicellular organism growth	Group	11	11	1	9	FXN	0.29776	biological_process	733
positive regulation of alpha-beta T cell proliferation	Group	11	11	1	9	BLM	0.29776	biological_process	734
positive regulation of JAK-STAT cascade	Group	11	11	1	9	CENPJ	0.29776	biological_process	735
regulation of Ras protein signal transduction	Group	11	11	1	9	ICMT	0.29776	biological_process	736
regulation of mitotic metaphase-anaphase transition	Group	11	11	1	9	CDC23	0.29776	biological_process	737
male meiosis I	Group	11	11	1	9	TRIP13	0.29776	biological_process	738
macrophage chemotaxis	Group	11	11	1	9	NUP85	0.29776	biological_process	739
ribosomal large subunit biogenesis	Group	11	11	1	9	RPL35A	0.29776	biological_process	740
establishment of cell polarity	Group	11	11	1	9	CFL1	0.29776	biological_process	741
sperm capacitation	Group	11	11	1	9	PEBP1	0.29776	biological_process	742
mannose metabolic process	Group	11	11	1	9	MRFAP1L1	0.29776	biological_process	743
glycine catabolic process	Group	11	11	1	9	GCSH	0.29776	biological_process	744
glutamate metabolic process	Group	11	11	1	9	GCLM	0.29776	biological_process	745
prostaglandin metabolic process	Group	11	11	1	9	HPGD	0.29776	biological_process	746
snRNA processing	Group	11	11	1	9	INTS6	0.29776	biological_process	747
tRNA modification	Group	11	11	1	9	METTL1	0.29776	biological_process	748
synaptic vesicle transport	Group	11	11	1	9	CTNNB1	0.29776	biological_process	749
limb development	Group	11	11	1	9	NR2F2	0.29776	biological_process	750
anagen	Group	11	11	1	9	PSEN2	0.29776	biological_process	751
establishment of protein localization	Group	11	11	1	9	VCP	0.29776	biological_process	752
oligosaccharide metabolic process	Group	11	11	1	9	GLA	0.29776	biological_process	753
suckling behavior	Group	11	11	1	9	PEX13	0.29776	biological_process	754
cell cycle arrest	Group	115	115	5	4	IL8,PMP22,KHDRBS1,C11orf82,WDR6	0.299169	biological_process	755
telomere maintenance	Group	35	35	2	5	PARP1,BLM	0.30402	biological_process	756
nucleocytoplasmic transport	Group	35	35	2	5	NUP98,RSRC1	0.30402	biological_process	757
metal ion transport	Group	35	35	2	5	SLC39A6,MRS2	0.30402	biological_process	758
synaptonemal complex assembly	Group	12	12	1	8	TEX15	0.319973	biological_process	759
negative regulation of protein catabolic process	Group	12	12	1	8	UCHL5IP	0.319973	biological_process	760
positive regulation of metabolic process	Group	12	12	1	8	PIGY	0.319973	biological_process	761
positive regulation of protein ubiquitination	Group	12	12	1	8	UBE2D1	0.319973	biological_process	762
regulation of osteoclast differentiation	Group	12	12	1	8	CTNNB1	0.319973	biological_process	763
ionotropic glutamate receptor signaling pathway	Group	12	12	1	8	CLN3	0.319973	biological_process	764
regulation of bone mineralization	Group	12	12	1	8	BMP2K	0.319973	biological_process	765
genetic imprinting	Group	12	12	1	8	CTCF	0.319973	biological_process	766
homeostasis of number of cells	Group	12	12	1	8	RRN3	0.319973	biological_process	767
cytosolic calcium ion homeostasis	Group	12	12	1	8	CLN3	0.319973	biological_process	768
neurotransmitter metabolic process	Group	12	12	1	8	CLN3	0.319973	biological_process	769
lymphocyte differentiation	Group	12	12	1	8	HELLS	0.319973	biological_process	770
alpha-beta T cell differentiation	Group	12	12	1	8	BLM	0.319973	biological_process	771
macrophage activation	Group	12	12	1	8	JMJD6	0.319973	biological_process	772
myeloid dendritic cell differentiation	Group	12	12	1	8	TRAF6	0.319973	biological_process	773
DNA packaging	Group	12	12	1	8	ARD1A	0.319973	biological_process	774
central nervous system projection neuron axonogenesis	Group	12	12	1	8	NR4A2	0.319973	biological_process	775
myeloid leukocyte differentiation	Group	12	12	1	8	PSEN2	0.319973	biological_process	776
glutathione biosynthetic process	Group	12	12	1	8	GCLM	0.319973	biological_process	777
ceramide biosynthetic process	Group	12	12	1	8	LASS6	0.319973	biological_process	778
protein deubiquitination	Group	12	12	1	8	UCK2	0.319973	biological_process	779
protein amino acid deacetylation	Group	12	12	1	8	NDST1	0.319973	biological_process	780
embryonic hemopoiesis	Group	12	12	1	8	SH2B3	0.319973	biological_process	781
urogenital system development	Group	12	12	1	8	HELLS	0.319973	biological_process	782
response to electrical stimulus	Group	12	12	1	8	PEBP1	0.319973	biological_process	783
spermatid development	Group	63	63	3	4	PEBP1,TCP1alpha,TRIP13	0.321072	biological_process	784
generation of precursor metabolites and energy	Group	63	63	3	4	VGF,SCO1,PHKG2	0.321072	biological_process	785
skeletal system development	Group	147	147	6	4	CTNNB1,TCOF1,RECQL4,WDR5,UFD1L,PGP	0.321335	biological_process	786
cell aging	Group	37	37	2	5	HRAS,NUP62	0.327463	biological_process	787
protein metabolic process	Group	37	37	2	5	OGFOD1,BAG2	0.327463	biological_process	788
response to steroid hormone stimulus	Group	37	37	2	5	CCND1,CCNE1	0.327463	biological_process	789
response to insulin stimulus	Group	37	37	2	5	PKM2,VGF	0.327463	biological_process	790
in utero embryonic development	Group	177	177	7	3	ICMT,SFRS1,PRMT1,AMD1,RPA1,SLC30A1,RRN3	0.327904	biological_process	791
microtubule-based movement	Group	120	120	5	4	TUBB2C,TUBA4A,KIF1A,TUBB,TUBB2A	0.33026	biological_process	792
regulation of synaptic plasticity	Group	38	38	2	5	CALB1,PSEN2	0.339106	biological_process	793
GPI anchor biosynthetic process	Group	38	38	2	5	PIGY,PIGW	0.339106	biological_process	794
negative regulation of growth	Group	13	13	1	7	ING5	0.341483	biological_process	795
negative regulation of cellular protein metabolic process	Group	13	13	1	7	NFKB1	0.341483	biological_process	796
negative regulation of striated muscle development	Group	13	13	1	7	LUC7L	0.341483	biological_process	797
positive regulation of T cell mediated cytotoxicity	Group	13	13	1	7	NP	0.341483	biological_process	798
positive regulation of foam cell differentiation	Group	13	13	1	7	NFKB1	0.341483	biological_process	799
positive regulation of gene expression	Group	13	13	1	7	SMAD1	0.341483	biological_process	800
regulation of Wnt receptor signaling pathway	Group	13	13	1	7	PPP2CA	0.341483	biological_process	801
erythrocyte development	Group	13	13	1	7	JMJD6	0.341483	biological_process	802
neuron maturation	Group	13	13	1	7	NR4A2	0.341483	biological_process	803
NLS-bearing substrate import into nucleus	Group	13	13	1	7	KPNA1	0.341483	biological_process	804
inositol metabolic process	Group	13	13	1	7	IMPA1	0.341483	biological_process	805
S-adenosylhomocysteine metabolic process	Group	13	13	1	7	ICMT	0.341483	biological_process	806
DNA integration	Group	13	13	1	7	SMARCB1	0.341483	biological_process	807
dorsal-ventral neural tube patterning	Group	13	13	1	7	PSEN2	0.341483	biological_process	808
T-helper 1 type immune response	Group	13	13	1	7	TRAF6	0.341483	biological_process	809
parturition	Group	13	13	1	7	HPGD	0.341483	biological_process	810
intestinal absorption	Group	13	13	1	7	DDI2	0.341483	biological_process	811
response to carbohydrate stimulus	Group	13	13	1	7	ME1	0.341483	biological_process	812
positive regulation of cell growth	Group	39	39	2	5	FXN,NOL8	0.350686	biological_process	813
induction of apoptosis by extracellular signals	Group	39	39	2	5	CASP8,MAP3K5	0.350686	biological_process	814
pigmentation	Group	40	40	2	5	RECQL4,HPS5	0.362196	biological_process	815
induction of an organ	Group	14	14	1	7	SIX1	0.362314	biological_process	816
induction of positive chemotaxis	Group	14	14	1	7	IL8	0.362314	biological_process	817
nerve growth factor receptor signaling pathway	Group	14	14	1	7	UTP11L	0.362314	biological_process	818
retinoic acid receptor signaling pathway	Group	14	14	1	7	RARA	0.362314	biological_process	819
smooth muscle cell differentiation	Group	14	14	1	7	TBX18	0.362314	biological_process	820
polyamine biosynthetic process	Group	14	14	1	7	ODC1	0.362314	biological_process	821
rRNA transcription	Group	14	14	1	7	MKI67IP	0.362314	biological_process	822
aerobic respiration	Group	14	14	1	7	FXN	0.362314	biological_process	823
skeletal muscle regeneration	Group	14	14	1	7	PKM2	0.362314	biological_process	824
thyroid gland development	Group	14	14	1	7	SIX1	0.362314	biological_process	825
response to vitamin D	Group	14	14	1	7	AQP3	0.362314	biological_process	826
organ morphogenesis	Group	185	185	7	3	HRAS,SPRY2,TRAF6,GMNN,HCCS,NDST1,BHLHB3	0.369013	biological_process	827
glycogen metabolic process	Group	41	41	2	4	AGL,PHKG2	0.373627	biological_process	828
humoral immune response	Group	41	41	2	4	YTHDF2,PSMB10	0.373627	biological_process	829
locomotion	Group	15	15	1	6	PSEN2	0.382486	biological_process	830
mitotic cell cycle checkpoint	Group	15	15	1	6	ZWILCH	0.382486	biological_process	831
macrophage differentiation	Group	15	15	1	6	CASP8	0.382486	biological_process	832
prostaglandin biosynthetic process	Group	15	15	1	6	PTGES2	0.382486	biological_process	833
pseudouridine synthesis	Group	15	15	1	6	PUS7L	0.382486	biological_process	834
cellular response to heat	Group	15	15	1	6	DHX9	0.382486	biological_process	835
antigen processing and presentation of exogenous peptide antigen via MHC class II	Group	15	15	1	6	TRAF6	0.382486	biological_process	836
response to arsenic	Group	15	15	1	6	ASNA1	0.382486	biological_process	837
BMP signaling pathway	Group	42	42	2	4	SMAD1,UBE2D1	0.384975	biological_process	838
protein processing	Group	42	42	2	4	CLN3,PSEN2	0.384975	biological_process	839
JAK-STAT cascade	Group	43	43	2	4	SOCS6,SOCS5	0.396231	biological_process	840
T cell differentiation	Group	43	43	2	4	EGR1,SOX4	0.396231	biological_process	841
embryonic development	Group	101	101	4	3	HUS1,E4F1,PSEN2,NDST1	0.396764	biological_process	842
skeletal muscle tissue development	Group	72	72	3	4	METTL8,NR2F2,SIX1	0.398977	biological_process	843
biosynthetic process	Group	72	72	3	4	C8orf38,ALAS1,EIF2B3	0.398977	biological_process	844
actin filament polymerization	Group	16	16	1	6	ARPC4	0.402021	biological_process	845
negative regulation of osteoclast differentiation	Group	16	16	1	6	CTNNB1	0.402021	biological_process	846
regulation of protein catabolic process	Group	16	16	1	6	PSMD1	0.402021	biological_process	847
regulation of action potential	Group	16	16	1	6	CLN3	0.402021	biological_process	848
mast cell activation	Group	16	16	1	6	LCP2	0.402021	biological_process	849
Golgi vesicle transport	Group	16	16	1	6	CLINT1	0.402021	biological_process	850
male genitalia development	Group	16	16	1	6	TEX15	0.402021	biological_process	851
female gonad development	Group	16	16	1	6	FANCA	0.402021	biological_process	852
gene expression	Group	16	16	1	6	NR4A2	0.402021	biological_process	853
sexual reproduction	Group	16	16	1	6	VGF	0.402021	biological_process	854
response to acid	Group	16	16	1	6	CHUK	0.402021	biological_process	855
activation of MAPK activity	Group	73	73	3	4	MAP3K5,MAP3K2,AVPI1	0.407513	biological_process	856
transforming growth factor beta receptor signaling pathway	Group	74	74	3	4	MAP3K7,SMAD1,HPGD	0.416012	biological_process	857
neuron migration	Group	74	74	3	4	NR4A2,NR2F2,PEX13	0.416012	biological_process	858
actin filament organization	Group	45	45	2	4	BIN3,CFL1	0.418451	biological_process	859
regulation of actin filament polymerization	Group	17	17	1	5	ARPC5L	0.420939	biological_process	860
negative regulation of specific transcription from RNA polymerase II promoter	Group	17	17	1	5	NFKB1	0.420939	biological_process	861
positive regulation of transcription factor activity	Group	17	17	1	5	GTF2A2	0.420939	biological_process	862
regulation of the force of heart contraction	Group	17	17	1	5	PEBP1	0.420939	biological_process	863
ribosomal small subunit biogenesis	Group	17	17	1	5	RPS28	0.420939	biological_process	864
cell morphogenesis involved in differentiation	Group	17	17	1	5	CTNNB1	0.420939	biological_process	865
vesicle fusion	Group	17	17	1	5	CAV2	0.420939	biological_process	866
preassembly of GPI anchor in ER membrane	Group	17	17	1	5	PIGW	0.420939	biological_process	867
ectoderm development	Group	17	17	1	5	CTNNB1	0.420939	biological_process	868
response to testosterone stimulus	Group	17	17	1	5	CASP6	0.420939	biological_process	869
positive regulation of cell differentiation	Group	46	46	2	4	CCNE1,SMAD1	0.429405	biological_process	870
dephosphorylation	Group	106	106	4	3	PTPN2,DUSP14,RNGTT,PTPMT1	0.432385	biological_process	871
negative regulation of endothelial cell proliferation	Group	18	18	1	5	CAV2	0.439259	biological_process	872
regulation of mitosis	Group	18	18	1	5	PRMT5	0.439259	biological_process	873
isotype switching	Group	18	18	1	5	MSH6	0.439259	biological_process	874
glycosaminoglycan biosynthetic process	Group	18	18	1	5	B3GALT6	0.439259	biological_process	875
bile acid metabolic process	Group	18	18	1	5	AKR1C1	0.439259	biological_process	876
fatty acid oxidation	Group	18	18	1	5	GCDH	0.439259	biological_process	877
GTP biosynthetic process	Group	18	18	1	5	NP	0.439259	biological_process	878
CTP biosynthetic process	Group	18	18	1	5	CTPS	0.439259	biological_process	879
cellular response to hormone stimulus	Group	18	18	1	5	FOS	0.439259	biological_process	880
endochondral ossification	Group	18	18	1	5	NAB2	0.439259	biological_process	881
gut development	Group	18	18	1	5	NAT1	0.439259	biological_process	882
embryonic pattern specification	Group	18	18	1	5	SMAD1	0.439259	biological_process	883
water transport	Group	18	18	1	5	AQP3	0.439259	biological_process	884
phosphoinositide-mediated signaling	Group	47	47	2	4	PCNA,FEN1	0.440248	biological_process	885
cellular process	Group	77	77	3	3	CTNNB1,BRMS1,PEPD	0.441257	biological_process	886
regulation of cell differentiation	Group	48	48	2	4	CTNNB1,PPP2CA	0.450976	biological_process	887
activation of phospholipase C activity by G-protein coupled receptor protein signaling pathway coupled to IP3 second messenger	Group	48	48	2	4	F2RL3,GNB4	0.450976	biological_process	888
hormone-mediated signaling	Group	48	48	2	4	NUP62,GNB4	0.450976	biological_process	889
epithelial cell differentiation	Group	48	48	2	4	WT1,SIX1	0.450976	biological_process	890
ovarian follicle development	Group	48	48	2	4	EIF2B4,VGF	0.450976	biological_process	891
negative regulation of cytokine production	Group	19	19	1	5	NFKB1	0.457	biological_process	892
regulation of insulin secretion	Group	19	19	1	5	ENSA	0.457	biological_process	893
regulation of mitotic cell cycle	Group	19	19	1	5	FBXO5	0.457	biological_process	894
synaptic transmission, cholinergic	Group	19	19	1	5	NQO1	0.457	biological_process	895
hydrogen peroxide catabolic process	Group	19	19	1	5	TXNRD1	0.457	biological_process	896
ceramide metabolic process	Group	19	19	1	5	PPP2CA	0.457	biological_process	897
lymph node development	Group	19	19	1	5	NFKB1	0.457	biological_process	898
secretion	Group	19	19	1	5	PTGES2	0.457	biological_process	899
membrane protein ectodomain proteolysis	Group	19	19	1	5	PSEN2	0.457	biological_process	900
response to copper ion	Group	19	19	1	5	NFKB1	0.457	biological_process	901
phospholipid biosynthetic process	Group	49	49	2	4	SELI,LPCAT1	0.461587	biological_process	902
nervous system development	Group	422	422	14	3	CHERP,FOS,NR4A2,NAB2,ZEB2,RAB23,ZIC2,PLXNA4,TIMM8A,BHLHB3,GMFB,STMN3,UTP11L,PAFAH1B3	0.465453	biological_process	903
cytokine-mediated signaling pathway	Group	80	80	3	3	TRAF6,NUP85,SOCS5	0.466069	biological_process	904
inactivation of MAPK activity	Group	20	20	1	5	PPP2CA	0.47418	biological_process	905
regulation of catalytic activity	Group	20	20	1	5	FXN	0.47418	biological_process	906
neuron apoptosis	Group	20	20	1	5	BID	0.47418	biological_process	907
DNA fragmentation involved in apoptosis	Group	20	20	1	5	DFFA	0.47418	biological_process	908
histone methylation	Group	20	20	1	5	PRMT7	0.47418	biological_process	909
protein targeting to membrane	Group	20	20	1	5	ICMT	0.47418	biological_process	910
intra-Golgi vesicle-mediated transport	Group	20	20	1	5	GOLGA3	0.47418	biological_process	911
oxygen transport	Group	20	20	1	5	HBD	0.47418	biological_process	912
lipid storage	Group	20	20	1	5	NRIP1	0.47418	biological_process	913
female gamete generation	Group	20	20	1	5	MAGOH	0.47418	biological_process	914
response to amphetamine	Group	20	20	1	5	NR4A2	0.47418	biological_process	915
cell death	Group	82	82	3	3	PSEN2,C10orf2,NUP62	0.482336	biological_process	916
Rho protein signal transduction	Group	51	51	2	3	CHUK,CFL1	0.482441	biological_process	917
chemotaxis	Group	145	145	5	3	IL8,HRAS,CXCL2,CXCL3,NUP85	0.485917	biological_process	918
kidney development	Group	83	83	3	3	JMJD6,ODC1,SMAD1	0.49038	biological_process	919
response to ethanol	Group	83	83	3	3	CCND1,CCNE1,PEBP1	0.49038	biological_process	920
lamellipodium assembly	Group	21	21	1	4	NUP85	0.490817	biological_process	921
positive regulation of gene-specific transcription	Group	21	21	1	4	HNRNPAB	0.490817	biological_process	922
homeostatic process	Group	21	21	1	4	SMAD1	0.490817	biological_process	923
regulation of blood vessel size	Group	21	21	1	4	GCLM	0.490817	biological_process	924
leukocyte chemotaxis	Group	21	21	1	4	CXCL3	0.490817	biological_process	925
synapse organization	Group	21	21	1	4	CTNNB1	0.490817	biological_process	926
catecholamine metabolic process	Group	21	21	1	4	SULT1A4	0.490817	biological_process	927
blastocyst development	Group	21	21	1	4	SMARCB1	0.490817	biological_process	928
alveolus development	Group	21	21	1	4	PSEN2	0.490817	biological_process	929
positive regulation of cell cycle	Group	22	22	1	4	TCF3	0.506929	biological_process	930
positive regulation of mitosis	Group	22	22	1	4	PEBP1	0.506929	biological_process	931
induction of apoptosis by intracellular signals	Group	22	22	1	4	MSH6	0.506929	biological_process	932
bone resorption	Group	22	22	1	4	CTNNB1	0.506929	biological_process	933
G2-M transition of mitotic cell cycle	Group	22	22	1	4	KHDRBS1	0.506929	biological_process	934
peroxisome organization	Group	22	22	1	4	PEX3	0.506929	biological_process	935
retina development in camera-type eye	Group	22	22	1	4	JMJD6	0.506929	biological_process	936
embryonic hindlimb morphogenesis	Group	22	22	1	4	CTNNB1	0.506929	biological_process	937
blood vessel morphogenesis	Group	22	22	1	4	NR2F2	0.506929	biological_process	938
camera-type eye morphogenesis	Group	22	22	1	4	CTNNB1	0.506929	biological_process	939
bone mineralization	Group	22	22	1	4	GLA	0.506929	biological_process	940
response to light stimulus	Group	22	22	1	4	FOS	0.506929	biological_process	941
positive regulation of B cell proliferation	Group	23	23	1	4	TCF3	0.522531	biological_process	942
positive regulation of JNK cascade	Group	23	23	1	4	MAP3K7	0.522531	biological_process	943
negative regulation of caspase activity	Group	23	23	1	4	DNAJB6	0.522531	biological_process	944
histone acetylation	Group	23	23	1	4	METTL8	0.522531	biological_process	945
lysosome organization	Group	23	23	1	4	CLN3	0.522531	biological_process	946
glycosaminoglycan metabolic process	Group	23	23	1	4	NDST1	0.522531	biological_process	947
pigmentation during development	Group	23	23	1	4	ZIC2	0.522531	biological_process	948
response to cadmium ion	Group	23	23	1	4	CTNNB1	0.522531	biological_process	949
response to zinc ion	Group	23	23	1	4	DDX19A	0.522531	biological_process	950
response to nicotine	Group	23	23	1	4	BAG1	0.522531	biological_process	951
cell motion	Group	120	120	4	3	TUBB2C,IL8,CFL1,TUBB	0.528278	biological_process	952
protein catabolic process	Group	56	56	2	3	CLN3,YME1L1	0.532322	biological_process	953
nucleobase, nucleoside, nucleotide and nucleic acid metabolic process	Group	89	89	3	3	NP,CTPS,AK2	0.537287	biological_process	954
patterning of blood vessels	Group	24	24	1	4	CTNNB1	0.53764	biological_process	955
chromatin silencing	Group	24	24	1	4	HELLS	0.53764	biological_process	956
positive regulation of mesenchymal cell proliferation	Group	24	24	1	4	TBX18	0.53764	biological_process	957
mitochondrial transport	Group	24	24	1	4	HSP90AA1	0.53764	biological_process	958
tricarboxylic acid cycle	Group	24	24	1	4	IDH3A	0.53764	biological_process	959
sex determination	Group	24	24	1	4	WT1	0.53764	biological_process	960
antigen processing and presentation of peptide or polysaccharide antigen via MHC class II	Group	24	24	1	4	HLA-DPB1	0.53764	biological_process	961
associative learning	Group	24	24	1	4	CLN3	0.53764	biological_process	962
activation of caspase activity	Group	57	57	2	3	VCP,HSPE1	0.541896	biological_process	963
transcription initiation	Group	25	25	1	4	BRF2	0.552271	biological_process	964
regulation of protein localization	Group	25	25	1	4	TEX15	0.552271	biological_process	965
establishment or maintenance of chromatin architecture	Group	25	25	1	4	SAFB	0.552271	biological_process	966
protein maturation by peptide bond cleavage	Group	25	25	1	4	PSEN2	0.552271	biological_process	967
response to osmotic stress	Group	25	25	1	4	NOLC1	0.552271	biological_process	968
protein amino acid phosphorylation	Group	739	739	23	3	RIOK2,CCND1,CHEK2,MAP3K5,CCNE1,CHUK,MAP3K7,MAP3K2,CFL1,ATR,STK17A,HUS1,TWF1,CRKRS,PIK3R4,CDK2AP1,GMFB,PRPF4B,TP53RK,BMP2K,DYRK2,RSRC1,PHKG2	0.561049	biological_process	969
mesoderm formation	Group	26	26	1	3	TXNRD1	0.56644	biological_process	970
release of cytochrome c from mitochondria	Group	26	26	1	3	BID	0.56644	biological_process	971
myeloid cell differentiation	Group	26	26	1	3	IFI16	0.56644	biological_process	972
tissue development	Group	26	26	1	3	WT1	0.56644	biological_process	973
ureteric bud branching	Group	26	26	1	3	SIX1	0.56644	biological_process	974
collagen catabolic process	Group	26	26	1	3	PEPD	0.56644	biological_process	975
keratinization	Group	60	60	2	3	PPHLN1,9030409G11Rik	0.569792	biological_process	976
response to wounding	Group	60	60	2	3	F2RL3,PEBP1	0.569792	biological_process	977
steroid metabolic process	Group	94	94	3	3	AKR1C1,OSBPL3,SULT1A4	0.574427	biological_process	978
intracellular signaling cascade	Group	390	390	12	3	DEF8,IL8,DFFA,SH2B3,SOCS6,PSEN2,SOCS4,SOCS5,DEDD2,DNMBP,STMN3,ASB6	0.579096	biological_process	979
protein homotetramerization	Group	27	27	1	3	Xtp3tpa	0.580161	biological_process	980
heterophilic cell adhesion	Group	27	27	1	3	LGALS1	0.580161	biological_process	981
activation of MAPKK activity	Group	27	27	1	3	MAP3K7	0.580161	biological_process	982
ATP metabolic process	Group	27	27	1	3	FIGNL1	0.580161	biological_process	983
pancreas development	Group	27	27	1	3	CTNNB1	0.580161	biological_process	984
positive regulation of nitric oxide biosynthetic process	Group	28	28	1	3	HSP90AA1	0.593449	biological_process	985
hindbrain development	Group	28	28	1	3	SMAD1	0.593449	biological_process	986
endoderm development	Group	28	28	1	3	ANKRD17	0.593449	biological_process	987
adult walking behavior	Group	28	28	1	3	FXN	0.593449	biological_process	988
small GTPase mediated signal transduction	Group	263	263	8	3	HRAS,DNAJC27,RAB11A,RAB23,RAB21,RAB18,RAB2A,RAB5C	0.593801	biological_process	989
microtubule cytoskeleton organization	Group	63	63	2	3	TUBGCP4,AP1G1	0.596437	biological_process	990
inner ear morphogenesis	Group	64	64	2	3	SPRY2,SIX1	0.605039	biological_process	991
isoprenoid biosynthetic process	Group	29	29	1	3	PDSS1	0.606316	biological_process	992
phosphate metabolic process	Group	29	29	1	3	IMPA1	0.606316	biological_process	993
metanephros development	Group	29	29	1	3	WT1	0.606316	biological_process	994
hair follicle development	Group	29	29	1	3	PSEN2	0.606316	biological_process	995
eating behavior	Group	29	29	1	3	PEBP1	0.606316	biological_process	996
response to lipopolysaccharide	Group	99	99	3	3	FOS,CHUK,TCF3	0.60965	biological_process	997
female pregnancy	Group	100	100	3	3	FOS,BYSL,HPGD	0.616456	biological_process	998
protein amino acid ADP-ribosylation	Group	30	30	1	3	PARP1	0.618776	biological_process	999
peripheral nervous system development	Group	30	30	1	3	PMP22	0.618776	biological_process	1000
response to antibiotic	Group	30	30	1	3	RSRC1	0.618776	biological_process	1001
regulation of cell proliferation	Group	135	135	4	2	CTNNB1,FANCA,GNL3,TOPORS	0.621397	biological_process	1002
response to peptide hormone stimulus	Group	101	101	3	2	EIF2B4,EIF2B1,EIF2B3	0.623181	biological_process	1003
rhythmic process	Group	31	31	1	3	SRRD	0.630843	biological_process	1004
positive regulation of neuron differentiation	Group	31	31	1	3	PRPF19	0.630843	biological_process	1005
regulation of neuron differentiation	Group	31	31	1	3	SIX1	0.630843	biological_process	1006
regulation of cytokine biosynthetic process	Group	31	31	1	3	IGF2BP1	0.630843	biological_process	1007
organelle organization	Group	31	31	1	3	HPS5	0.630843	biological_process	1008
endosome transport	Group	31	31	1	3	SNX17	0.630843	biological_process	1009
lens development in camera-type eye	Group	31	31	1	3	CASP6	0.630843	biological_process	1010
embryonic morphogenesis	Group	31	31	1	3	ZEB2	0.630843	biological_process	1011
response to inorganic substance	Group	31	31	1	3	NR4A2	0.630843	biological_process	1012
response to metal ion	Group	31	31	1	3	CASP6	0.630843	biological_process	1013
glycolysis	Group	68	68	2	2	PKM2,GNE	0.638051	biological_process	1014
positive regulation of DNA replication	Group	32	32	1	3	HRAS	0.642528	biological_process	1015
fibroblast growth factor receptor signaling pathway	Group	32	32	1	3	NDST1	0.642528	biological_process	1016
hormone metabolic process	Group	32	32	1	3	SAFB	0.642528	biological_process	1017
acyl-CoA metabolic process	Group	32	32	1	3	GCDH	0.642528	biological_process	1018
gastrulation	Group	32	32	1	3	TXNRD1	0.642528	biological_process	1019
neuromuscular process controlling balance	Group	32	32	1	3	CLN3	0.642528	biological_process	1020
fertilization	Group	32	32	1	3	TEX15	0.642528	biological_process	1021
neuron differentiation	Group	104	104	3	2	NR4A2,BAG1,VGF	0.642869	biological_process	1022
central nervous system development	Group	140	140	4	2	PTS,TP53BP2,ZEB2,ZIC2	0.649733	biological_process	1023
gastrulation with mouth forming second	Group	33	33	1	3	CTNNB1	0.653843	biological_process	1024
branching morphogenesis of a tube	Group	33	33	1	3	SPRY2	0.653843	biological_process	1025
visual learning	Group	33	33	1	3	HRAS	0.653843	biological_process	1026
lung development	Group	106	106	3	2	SPRY2,CTNNB1,JMJD6	0.655585	biological_process	1027
heart development	Group	176	176	5	2	CASP8,CTNNB1,JMJD6,SOX4,TP53BP2	0.657086	biological_process	1028
negative regulation of Wnt receptor signaling pathway	Group	34	34	1	2	CCND1	0.664801	biological_process	1029
positive regulation of anti-apoptosis	Group	34	34	1	2	SMAD1	0.664801	biological_process	1030
epidermal growth factor receptor signaling pathway	Group	34	34	1	2	SOCS5	0.664801	biological_process	1031
regulation of multicellular organism growth	Group	34	34	1	2	SPR	0.664801	biological_process	1032
embryonic skeletal system development	Group	34	34	1	2	DLX1	0.664801	biological_process	1033
respiratory gaseous exchange	Group	34	34	1	2	NDST1	0.664801	biological_process	1034
synaptic transmission	Group	214	214	6	2	CTNNB1,HOMER1,PMP22,CAV2,SMN2,USP14	0.673234	biological_process	1035
positive regulation of T cell proliferation	Group	35	35	1	2	NP	0.675412	biological_process	1036
smoothened signaling pathway	Group	35	35	1	2	NDST1	0.675412	biological_process	1037
phagocytosis	Group	35	35	1	2	CORO1C	0.675412	biological_process	1038
Ras protein signal transduction	Group	73	73	2	2	HRAS,G3BP1	0.676218	biological_process	1039
angiogenesis	Group	145	145	4	2	IL8,CASP8,MAP3K7,NARG1	0.676622	biological_process	1040
cellular component organization	Group	36	36	1	2	FHOD1	0.685688	biological_process	1041
anterior-posterior pattern formation	Group	111	111	3	2	MLLT3,NR2F2,GRSF1	0.685937	biological_process	1042
response to hypoxia	Group	184	184	5	2	NR4A2,SOX4,PKM2,PSEN2,UBQLN1	0.694796	biological_process	1043
cell maturation	Group	37	37	1	2	CTNNB1	0.695638	biological_process	1044
embryo implantation	Group	37	37	1	2	FKBP4	0.695638	biological_process	1045
multicellular organism growth	Group	37	37	1	2	ICMT	0.695638	biological_process	1046
meiosis	Group	76	76	2	2	RBM7,RPA1	0.697505	biological_process	1047
cholesterol homeostasis	Group	38	38	1	2	AKR1C1	0.705274	biological_process	1048
insulin secretion	Group	38	38	1	2	VGF	0.705274	biological_process	1049
mesoderm development	Group	38	38	1	2	PPP2CA	0.705274	biological_process	1050
brain development	Group	151	151	4	2	PEBP1,ZIC2,UTP3,ATP6V0D1	0.706949	biological_process	1051
lipid biosynthetic process	Group	115	115	3	2	PRPF19,PTGES2,LASS6	0.708745	biological_process	1052
protein homooligomerization	Group	78	78	2	2	VCP,AKR1C1	0.711042	biological_process	1053
protein localization	Group	78	78	2	2	BIN3,ICMT	0.711042	biological_process	1054
response to estrogen stimulus	Group	78	78	2	2	CCND1,CTNNB1	0.711042	biological_process	1055
inflammatory response	Group	293	293	8	2	IL8,CXCL2,FOS,CXCL3,NFKB1,SMAD1,NDST1,NFX1	0.711426	biological_process	1056
response to nutrient	Group	117	117	3	2	PKM2,AGL,ENSA	0.719662	biological_process	1057
negative regulation of neuron differentiation	Group	40	40	1	2	PRPF19	0.723642	biological_process	1058
positive regulation of MAPKKK cascade	Group	40	40	1	2	CTNNB1	0.723642	biological_process	1059
positive regulation of NF-kappaB transcription factor activity	Group	40	40	1	2	UBE2N	0.723642	biological_process	1060
one-carbon compound metabolic process	Group	40	40	1	2	MTHFD2L	0.723642	biological_process	1061
positive regulation of protein amino acid phosphorylation	Group	41	41	1	2	CCND1	0.732392	biological_process	1062
germ cell development	Group	41	41	1	2	WT1	0.732392	biological_process	1063
cell communication	Group	120	120	3	2	SNX16,SNX5,SNX17	0.735438	biological_process	1064
cell surface receptor linked signal transduction	Group	230	230	6	2	HRAS,JMJD6,BAG1,KHDRBS1,PRMT1,NUP62	0.738083	biological_process	1065
growth	Group	43	43	1	2	SAFB	0.749071	biological_process	1066
negative regulation of cell migration	Group	43	43	1	2	GTPBP4	0.749071	biological_process	1067
positive regulation of smooth muscle cell proliferation	Group	43	43	1	2	TRAF6	0.749071	biological_process	1068
memory	Group	43	43	1	2	PSEN2	0.749071	biological_process	1069
cell-cell adhesion	Group	123	123	3	2	CTNNB1,ICAM3,PNN	0.750503	biological_process	1070
positive regulation of epithelial cell proliferation	Group	44	44	1	2	TBX18	0.757017	biological_process	1071
skeletal system morphogenesis	Group	44	44	1	2	RECQL4	0.757017	biological_process	1072
negative regulation of cell differentiation	Group	45	45	1	2	CTNNB1	0.764712	biological_process	1073
calcium-mediated signaling	Group	45	45	1	2	IL8	0.764712	biological_process	1074
peptidyl-tyrosine phosphorylation	Group	45	45	1	2	DYRK2	0.764712	biological_process	1075
insulin receptor signaling pathway	Group	46	46	1	2	PTPN2	0.772163	biological_process	1076
I-kappaB kinase-NF-kappaB cascade	Group	46	46	1	2	SNIP1	0.772163	biological_process	1077
cell projection organization	Group	46	46	1	2	CFL1	0.772163	biological_process	1078
carbohydrate transport	Group	46	46	1	2	SLC35B1	0.772163	biological_process	1079
adult locomotory behavior	Group	46	46	1	2	NR4A2	0.772163	biological_process	1080
excretion	Group	47	47	1	2	AQP3	0.779379	biological_process	1081
cell-matrix adhesion	Group	90	90	2	2	CTNNB1,FXC1	0.781942	biological_process	1082
locomotory behavior	Group	90	90	2	2	CALB1,PEX13	0.781942	biological_process	1083
actin cytoskeleton organization	Group	169	169	4	2	HRAS,VASP,FHOD1,CORO1C	0.785337	biological_process	1084
cell development	Group	48	48	1	2	TRAF6	0.786366	biological_process	1085
JNK cascade	Group	49	49	1	2	TRAF6	0.793132	biological_process	1086
blood coagulation	Group	93	93	2	2	F2RL3,HPS5	0.797097	biological_process	1087
cellular iron ion homeostasis	Group	50	50	1	2	FXN	0.799685	biological_process	1088
glucose homeostasis	Group	50	50	1	2	VGF	0.799685	biological_process	1089
vasculogenesis	Group	51	51	1	1	WT1	0.806029	biological_process	1090
blood vessel development	Group	51	51	1	1	JMJD6	0.806029	biological_process	1091
response to glucocorticoid stimulus	Group	95	95	2	2	CCND1,AGL	0.806676	biological_process	1092
dorsal-ventral pattern formation	Group	53	53	1	1	CTNNB1	0.818123	biological_process	1093
embryonic skeletal system morphogenesis	Group	54	54	1	1	SIX1	0.823885	biological_process	1094
protein amino acid autophosphorylation	Group	100	100	2	2	EIF2S1,CRKRS	0.82888	biological_process	1095
cell growth	Group	55	55	1	1	SOCS5	0.829464	biological_process	1096
ossification	Group	101	101	2	1	TRAF6,TFIP11	0.833036	biological_process	1097
aging	Group	101	101	2	1	FOS,PEBP1	0.833036	biological_process	1098
amino acid transport	Group	56	56	1	1	CLN3	0.834866	biological_process	1099
response to mechanical stimulus	Group	56	56	1	1	FOS	0.834866	biological_process	1100
epidermis development	Group	102	102	2	1	TFDP1,FABP5	0.8371	biological_process	1101
neuron projection development	Group	58	58	1	1	STMN3	0.845164	biological_process	1102
camera-type eye development	Group	58	58	1	1	WT1	0.845164	biological_process	1103
sodium ion transport	Group	149	149	3	2	SLC10A4,TRAPPC10,SLC5A6	0.853837	biological_process	1104
response to hydrogen peroxide	Group	61	61	1	1	CASP6	0.85942	biological_process	1105
Notch signaling pathway	Group	62	62	1	1	PSEN2	0.863875	biological_process	1106
ATP synthesis coupled proton transport	Group	62	62	1	1	ATP6V0D1	0.863875	biological_process	1107
response to virus	Group	110	110	2	1	IFI16,IVNS1ABP	0.866517	biological_process	1108
pattern specification process	Group	64	64	1	1	SIX1	0.872365	biological_process	1109
response to chemical stimulus	Group	64	64	1	1	C14orf104	0.872365	biological_process	1110
chromatin assembly or disassembly	Group	65	65	1	1	CBX2	0.87641	biological_process	1111
embryonic limb morphogenesis	Group	65	65	1	1	PSEN2	0.87641	biological_process	1112
cell fate commitment	Group	66	66	1	1	SPRY2	0.880327	biological_process	1113
glucose metabolic process	Group	115	115	2	1	PKM2,PGM2	0.882341	biological_process	1114
proton transport	Group	69	69	1	1	ATP6V0D1	0.891349	biological_process	1115
digestion	Group	69	69	1	1	AKR1C1	0.891349	biological_process	1116
wound healing	Group	69	69	1	1	SMAD1	0.891349	biological_process	1117
cellular defense response	Group	69	69	1	1	ZNF148	0.891349	biological_process	1118
ATP biosynthetic process	Group	74	74	1	1	PKM2	0.907511	biological_process	1119
sensory perception of taste	Group	74	74	1	1	GNB4	0.907511	biological_process	1120
visual perception	Group	213	213	4	1	RABGGTB,TOPORS,PDCL,WDR36	0.907744	biological_process	1121
steroid biosynthetic process	Group	75	75	1	1	AKR1C1	0.910443	biological_process	1122
post-embryonic development	Group	77	77	1	1	NR4A2	0.916032	biological_process	1123
lipid metabolic process	Group	342	342	7	2	ACOT7,NR2F2,HPGD,AKR1C1,FABP5,SULT1A4,PAFAH1B3	0.918088	biological_process	1124
regulation of gene expression	Group	78	78	1	1	CLN3	0.918694	biological_process	1125
fatty acid biosynthetic process	Group	78	78	1	1	PTGES2	0.918694	biological_process	1126
regulation of Rho protein signal transduction	Group	86	86	1	1	DNMBP	0.93717	biological_process	1127
cellular calcium ion homeostasis	Group	87	87	1	1	CHERP	0.939163	biological_process	1128
protein amino acid glycosylation	Group	89	89	1	1	B3GALT6	0.942961	biological_process	1129
anatomical structure development	Group	90	90	1	1	SIX1	0.94477	biological_process	1130
cation transport	Group	90	90	1	1	SLC30A1	0.94477	biological_process	1131
extracellular matrix organization	Group	94	94	1	1	TFIP11	0.951451	biological_process	1132
lipid transport	Group	94	94	1	1	OSBPL3	0.951451	biological_process	1133
cell migration	Group	97	97	1	1	NUP62	0.955927	biological_process	1134
cell differentiation	Group	658	658	14	2	SPATA2,MCL1,CTNNB1,JMJD6,GOLGA3,PMP22,MEA1,SH2B3,SMARCB1,NARG1,ZIC2,DLX1,BHLHB3,TFIP11	0.957115	biological_process	1135
muscle organ development	Group	100	100	1	1	SIX1	0.95999	biological_process	1136
integrin-mediated signaling pathway	Group	103	103	1	0	EIF6	0.963679	biological_process	1137
axon guidance	Group	106	106	1	0	VASP	0.967029	biological_process	1138
immune response	Group	604	604	12	1	GPR183,IL8,CXCL2,CXCL3,CHUK,HLA-DPB1,TRAF6,LCP2,LIME1,NP,OTUB1,NUDCD1	0.970193	biological_process	1139
fatty acid metabolic process	Group	110	110	1	0	HPGD	0.97102	biological_process	1140
neuropeptide signaling pathway	Group	112	112	1	0	FLJ13314	0.97283	biological_process	1141
transmembrane receptor protein tyrosine kinase signaling pathway	Group	113	113	1	0	LCP2	0.973693	biological_process	1142
lipid catabolic process	Group	113	113	1	0	PAFAH1B3	0.973693	biological_process	1143
protein kinase cascade	Group	120	120	1	0	STK17A	0.979011	biological_process	1144
sperm motility	Group	127	127	1	0	DNAJA1	0.983255	biological_process	1145
multicellular organismal development	Group	1080	1080	23	2	SPATA2,MCL1,SPRY2,JMJD6,GOLGA3,ATR,MEA1,RECQL4,HELLS,UHRF1,SIX1,PPP1R8,NARG1,ZIC2,TBX18,PLXNA4,MXD1,DLX1,UTP3,ZNF7,LDB2,AHCTF1,ELAVL1	0.984861	biological_process	1146
proteolysis	Group	651	651	12	1	PWP2,DDX31,DDI2,PRSSL1,CASP8,CASP6,UBE2N,SENP5,PEPD,DPP3,YME1L1,PMPCA	0.986084	biological_process	1147
Wnt receptor signaling pathway	Group	134	134	1	0	CTNNB1	0.986642	biological_process	1148
calcium ion transport	Group	149	149	1	0	PSEN2	0.99177	biological_process	1149
cell-cell signaling	Group	275	275	3	1	IL8,SPRY2,TUSC2	0.992898	biological_process	1150
anatomical structure morphogenesis	Group	159	159	1	0	CHUK	0.994042	biological_process	1151
potassium ion transport	Group	179	179	1	0	KCTD10	0.996879	biological_process	1152
defense response	Group	188	188	1	0	SOCS6	0.997667	biological_process	1153
ion transport	Group	626	626	6	0	SLC10A4,SLC39A6,SLC30A1,MRS2,SLC5A6,ATP6V0D1	0.999938	biological_process	1154
cell adhesion	Group	650	650	5	0	HSPB11,CTNNB1,BYSL,PNN,GNE	0.999993	biological_process	1155
response to stimulus	Group	724	724	3	0	TOPORS,PDCL,WDR36	1	biological_process	1156
signal transduction	Group	2809	2809	28	0	GPR183,PWP2,RGD1564081,RARA,PDE4A,HSP90AA1,NFKB1,TRAF6,F2RL3,MAP3K7,NR4A2,SMAD1,PHB,NR2F2,TRAF5,IMPA1,TP53BP2,TXNRD1,STAM,RAB23,AKAP8,PLXNA4,PDCL,SNX17,GMFB,CORO1C,GNB4,FAM13B1	1	biological_process	1157
G-protein coupled receptor protein signaling pathway	Group	2761	2761	4	0	GPR183,IL8,F2RL3,GNB4	1	biological_process	1158

## Sheet: Table S2 (down-regulated)
Name	Type	Total Entities	Expanded # of Entities	Overlap	Percent Overlap	Overlapping Entities	p-value	Data Source	#
metabolic process	Group	858	858	59	6	GNS,MAN1A1,MAN1B1,ATP11B,MAN2B2,DHRS7,DHTKD1,C7orf10,ACAD10,CBR4,ARSK,HEXA,ATP1A1,ATP2A2,INSIG1,EPHX2,ACSL1,ATP2A3,ATP2B1,IDH1,PLD1,MGEA5,ACSL3,FUCA1,SAT1,HEXB,ALAS2,GFPT1,GBA,WWOX,ATP7A,PFKFB2,ASNS,PHGDH,HSD17B12,ATP2C1,GALC,IDH2,ALDOC,GUSB,KDSR,HSD17B8,HMGCL,PNPLA8,PIGN,ENPP3,ALDH6A1,MANBA,GLB1,HMGCS1,PCCA,ACSM3,C1orf38,QPRT,MAN2A1,MICAL2,HSD17B11,GCAT,METTL7A	1.94901e-15	biological_process	1
transport	Group	1807	1807	82	4	HBQ1,XK,TM9SF2,ABCA8,CCDC91,LAPTM4B,SLC30A10,SNX14,SERINC1,SLC22A23,ATP6V1E2,SLC39A13,ANO6,CLCN3,CD36,SLC11A2,IGF2R,SYT1,KCNN4,SLC2A1,P2RX1,APOC1,ATP1A1,SLCO1A2,ATP2A2,TF,ATP2A3,ITPR1,SLC4A1,STARD4,HBE1,ABCB7,HEPH,RHD,LMAN1,SORT1,FADS1,SLC7A1,CUX1,SLC1A4,SORBS1,ATP7A,SLC44A1,ABCC5,GABRG1,SLC31A1,CLCN5,NUP210,RHAG,SLC16A1,ATP2C1,KCNE3,SLC26A2,SCN9A,SEC63,EXOC4,SCAMP1,SIL1,FLVCR1,ABCA7,SLC22A4,RTN3…	4.83482e-11	biological_process	2
oxidation reduction	Group	702	702	41	5	DHRS7,DHTKD1,PCYOX1L,SRD5A3,PYROXD1,CBR4,PTGS1,HMGCR,PRDX5,SCD,MTHFR,IDH1,CYP51A1,HEPH,FADS1,VKORC1,EGLN1,WWOX,EGLN3,CPOX,PHGDH,SC4MOL,HSD17B12,DHCR7,PAM,IDH2,ASPH,ERO1L,P4HA2,KDSR,HSD17B8,ALDH6A1,PCYOX1,PPOX,CYP2R1,PLOD1,RETSAT,HSD17B11,P4HA1,TM7SF2,TXNDC12	5.70542e-09	biological_process	3
carbohydrate metabolic process	Group	296	296	24	8	PHKB,GANAB,MAN2B2,HEXA,FUT1,IDH1,PKLR,FUCA1,HEXB,GFPT1,GBA,GALC,PYGL,IDH2,PPP1CB,PDK1,HAGH,GUSB,B4GALT1,MANBA,GLB1,PPP1R3B,MAN2A1,CHST11	2.34703e-08	biological_process	4
cell adhesion	Group	650	650	37	5	FAT,DGCR2,DCHS2,CD44,FN1,CD36,ITGB1,DDR1,COL18A1,HSPG2,ITGAV,F11R,ATP2A2,ICAM2,FER,ICAM4,RELN,CD96,ITGB5,CD99L2,LAMA5,ROBO1,DSG2,PKP3,SCARB2,LAMB1,DSC2,NCAM2,LAMC1,PTPRS,FEZ1,B4GALT1,AMIGO2,C1orf38,IGSF11,CLSTN1,CLSTN3	6.18238e-08	biological_process	5
response to hypoxia	Group	184	184	18	9	VEGFA,ADAM17,BCL2,HSP90B1,TF,ITPR1,ECE1,PKLR,NF1,TGFBR3,ALAS2,BNIP3,EGLN1,EGLN3,LONP1,PAM,ALDOC,PLOD1	8.11588e-08	biological_process	6
ion transport	Group	626	626	34	5	ATP11B,SLC30A10,SLC22A23,ATP6V1E2,SLC39A13,ANO6,CLCN3,SLC11A2,KCNN4,P2RX1,ATP1A1,SLCO1A2,ATP2A2,TF,ATP2A3,ITPR1,SLC4A1,ABCC4,HEPH,ATP7A,GABRG1,SLC31A1,CLCN5,ATP2C1,KCNE3,SCN9A,SLC22A4,SLC38A1,ATP6AP1,KCNK1,SLC30A6,SLCO4C1,SLC39A10,SLC25A37	6.25663e-07	biological_process	7
protein amino acid N-linked glycosylation via asparagine	Group	10	10	5	50	STT3B,TUSC3,RPN2,DDOST,MAGT1	9.52634e-07	biological_process	8
lipid biosynthetic process	Group	115	115	13	11	PTGS1,HMGCR,SCD,FADS1,SC4MOL,HSD17B12,DHCR7,CLN8,HSD17B8,PRKAB2,HMGCS1,HSD17B11,TM7SF2	9.94089e-07	biological_process	9
regulation of cell proliferation	Group	135	135	14	10	PTGS1,ERBB3,BMPR2,TXNIP,NF1,SAT1,BCL6,EGLN3,LAMA5,KLF10,DHCR7,ATF5,B4GALT1,CHST11	1.10181e-06	biological_process	10
response to organic cyclic substance	Group	142	142	14	9	CD44,BCL2,PRKCA,PTCH1,COMT,TF,ACSL1,IDH1,PKLR,ABCC4,FADS1,VKORC1,ALDOC,NFIA	2.02452e-06	biological_process	11
cellular calcium ion homeostasis	Group	87	87	11	12	BCL2,PRKCA,ITGB1,TNNI3,ITGAV,ATP2A2,EPHX2,HEXB,ATP2C1,TRDN,CLSTN1	2.22551e-06	biological_process	12
lipid metabolic process	Group	342	342	22	6	DDHD2,APOL2,SERINC1,SRD5A3,GDPD1,CD36,SCD,INSIG1,ACSL1,PCSK9,ACSL3,PSAP,FADS1,GBA,PLCB1,MBTPS2,NPHP3,PNPLA8,ASAH1,APOL1,ACSM3,APOL4	4.4158e-06	biological_process	13
heart development	Group	176	176	15	8	ERBB3,TNNI3,MAP2K5,NFATC1,ID2,ECE1,NF1,FOXP1,BCOR,EGLN1,RB1CC1,ACVR2B,HDAC9,MIB1,PAM	5.4388e-06	biological_process	14
lysosome organization	Group	23	23	6	26	HEXA,PSAP,PPT1,HEXB,GBA,CLN8	6.4222e-06	biological_process	15
PMA-inducible membrane protein ectodomain proteolysis	Group	3	3	3	100	ADAM17,ADAM10,ADAM9	9.36659e-06	biological_process	16
ATP biosynthetic process	Group	74	74	9	12	ATP11B,ATP1A1,ATP2A2,ATP2A3,ATP2B1,PKLR,ATP11A,ATP7A,ATP2C1	2.56024e-05	biological_process	17
heme biosynthetic process	Group	18	18	5	27	NFE2L1,FECH,ALAS2,CPOX,PPOX	2.81511e-05	biological_process	18
cholesterol metabolic process	Group	75	75	9	12	APOL2,LEPR,APOC1,INSIG1,PCSK9,FECH,MBTPS2,CLN8,APOL1	2.85554e-05	biological_process	19
erythrocyte differentiation	Group	31	31	6	19	FECH,HEPH,ALAS2,DNASE2,FLVCR1,TCEA1	4.05773e-05	biological_process	20
B cell differentiation	Group	47	47	7	14	ADAM17,BCL2,ITGB1,NTRK1,PTPRC,BCL6,HDAC9	5.45919e-05	biological_process	21
aging	Group	101	101	10	9	PTGS1,CTSC,BCL2,PRKCA,MGEA5,FADS1,LONP1,ALDOC,ATP6AP1,ENO3	5.60591e-05	biological_process	22
response to drug	Group	295	295	18	6	DGCR2,ERBB3,ADAM17,BCL2,COL18A1,PTCH1,COMT,ATP1A1,B2M,TXNIP,ACSL1,ABCC4,CPOX,GGH,MAP1B,PAM,ENO3,HMGCS1	6.38866e-05	biological_process	23
embryo implantation	Group	37	37	6	16	DDR1,BSG,GRN,KLF9,IL11RA,LAMB1	0.000115076	biological_process	24
biological_process	Group	3014	3014	93	3	MEGF9,XK,ZC3H11A,ABCA8,RUFY3,TMEM194A,DPY19L1,TMEM131,KIAA0240,C9orf5,APOL2,FBXO25,TMEM106B,DCHS2,DHTKD1,CCDC47,TNRC18,HMBOX1,ACBD4,C7orf10,ITFG1,TMEM107,ARHGAP19,TMEM116,ARRDC4,TMEM56,ARSK,CLYBL,CCDC11,Gtlf3b,FRYL,C6orf26,C6orf124,LTBP1,ERV3,FUCA1,CEP57,BCL6,ABCC4,ABCB7,EPB41,TFR2,IFNGR1,WWOX,GYPC,SORBS1,NCOA4,CD3D,ARID3B,RB1CC1,EIF2C4,PKP3,AAK1,ANTXR2,LAMP3,TMEM2,CCPG1,RHAG,HSD17B12,NOSTRIN,TBL…	0.000119785	biological_process	25
proteolysis	Group	651	651	29	4	ERMP1,IMMP2L,LONRF2,CTSC,ADAM17,ADAM10,CTSB,CTSL1,ADAM9,CTSH,CD46,ECE1,PCSK9,ERAP1,TFR2,PRCP,PIGK,LONP1,NCSTN,Pgcp,CPD,MBTPS2,AGTPBP1,TMPRSS5,TMPRSS4,SCPEP1,CTSZ,C1RL,ADAMTS6	0.000151928	biological_process	26
negative regulation of complement activation	Group	6	6	3	50	CR1L,CD59,CD46	0.000178624	biological_process	27
L-serine transport	Group	6	6	3	50	SERINC1,SLC1A4,SERINC3	0.000178624	biological_process	28
steroid biosynthetic process	Group	75	75	8	10	HMGCR,SC4MOL,HSD17B12,DHCR7,HSD17B8,HMGCS1,HSD17B11,TM7SF2	0.000183522	biological_process	29
post-embryonic development	Group	77	77	8	10	CCDC47,BCL2,ITPR1,SEPP1,ACVR2B,SCN9A,DHCR7,CHST11	0.000220623	biological_process	30
sterol biosynthetic process	Group	27	27	5	18	HMGCR,SC4MOL,DHCR7,HMGCS1,TM7SF2	0.000226685	biological_process	31
protein folding	Group	194	194	13	6	HSP90B1,LRPAP1,CANX,LMAN1,PDIA6,ATF6,TXNDC4,ERP29,SEC63,SIL1,ERO1L,UGCGL1,AARS	0.000263485	biological_process	32
sexual reproduction	Group	16	16	4	25	HEXA,SEPP1,HEXB,ACVR2B	0.000292567	biological_process	33
regulation of complement activation	Group	7	7	3	42	CR1L,CD59,CFH	0.000307681	biological_process	34
positive regulation of epithelial cell proliferation	Group	44	44	6	13	VEGFA,GRN,MAP2K5,FOXP1,LAMB1,LAMC1	0.000308377	biological_process	35
anti-apoptosis	Group	198	198	13	6	FN1,VEGFA,ADAM17,BCL2,HSP90B1,IGF1R,CD59,DAPK1,HSPA5,SERPINB9,BNIP3,ATF5,AMIGO2	0.000321065	biological_process	36
positive regulation of apoptosis	Group	149	149	11	7	COL18A1,BBC3,PTPRC,PDIA3,FGFR3,BNIP3L,DAPK1,TXNIP,NF1,BCL6,B4GALT1	0.000338979	biological_process	37
cellular response to insulin stimulus	Group	47	47	6	12	ERBB3,PCSK9,RHOQ,PKLR,GFPT1,SORBS1	0.000444663	biological_process	38
positive regulation of T cell chemotaxis	Group	2	2	2	100	ADAM17,ADAM10	0.000445079	biological_process	39
glyoxylate cycle	Group	2	2	2	100	IDH1,IDH2	0.000445079	biological_process	40
protein amino acid terminal N-glycosylation	Group	2	2	2	100	B4GALT1,DDOST	0.000445079	biological_process	41
glycosaminoglycan catabolic process	Group	8	8	3	37	GNS,FUCA1,GUSB	0.000484565	biological_process	42
neuromuscular process controlling balance	Group	32	32	5	15	HEXA,HEXB,APLP2,CLN8,AARS	0.000518357	biological_process	43
organ regeneration	Group	49	49	6	12	DDR1,GAS6,AXL,LIFR,TGFBR3,ALDOC	0.000558848	biological_process	44
homophilic cell adhesion	Group	159	159	11	6	FAT,DCHS2,ITGB1,ROBO1,DSG2,ROBO2,DSC2,AMIGO2,CELSR2,CLSTN1,CLSTN3	0.000587924	biological_process	45
cholesterol biosynthetic process	Group	33	33	5	15	HMGCR,CYP51A1,DHCR7,HMGCS1,TM7SF2	0.000600405	biological_process	46
blood vessel development	Group	51	51	6	11	VEGFA,ITGAV,TGFBR3,ATP7A,MIB1,DHCR7	0.000694583	biological_process	47
regulation of smooth muscle contraction	Group	20	20	4	20	P2RX1,TNNI3,NMU,CNN1	0.000728332	biological_process	48
extracellular matrix organization	Group	94	94	8	8	FN1,COL18A1,HSPG2,NF1,ATP7A,APLP2,HSD17B12,B4GALT1	0.000854306	biological_process	49
lipid transport	Group	94	94	8	8	APOL2,TNRC18,APOC1,PSAP,STARD4,CLN8,APOL1,APOL4	0.000854306	biological_process	50
glutamine metabolic process	Group	21	21	4	19	GFPT1,GGH,ASNS,PHGDH	0.000884776	biological_process	51
alveolus development	Group	21	21	4	19	VEGFA,BMPR2,ATP7A,MAN2A1	0.000884776	biological_process	52
ear development	Group	10	10	3	30	BCL2,DDR1,ECE1	0.00100607	biological_process	53
protein metabolic process	Group	37	37	5	13	EGLN1,EGLN3,P4HA2,PLOD1,P4HA1	0.00102882	biological_process	54
peptidyl-threonine phosphorylation	Group	23	23	4	17	BCL2,PRKCA,ACVR1B,TNKS	0.00126602	biological_process	55
cell surface receptor linked signal transduction	Group	230	230	13	5	MAPK14,CD59,BSG,PTPRC,LEPR,ACVR1B,TNFRSF10B,FZD5,CD3D,GPR98,PDK1,FZD3,CELSR2	0.00129792	biological_process	56
fatty acid biosynthetic process	Group	78	78	7	8	PTGS1,SCD,ACSL3,FADS1,SC4MOL,PRKAB2,ACSM3	0.00130722	biological_process	57
positive regulation of activin receptor signaling pathway	Group	3	3	2	66	ACVR1B,ACVR2B	0.0013165	biological_process	58
peptidyl-proline hydroxylation to 4-hydroxy-L-proline	Group	3	3	2	66	P4HA2,P4HA1	0.0013165	biological_process	59
prenylcysteine catabolic process	Group	3	3	2	66	PCYOX1L,PCYOX1	0.0013165	biological_process	60
protoporphyrinogen IX metabolic process	Group	3	3	2	66	FECH,PPOX	0.0013165	biological_process	61
regulation of cell-matrix adhesion	Group	11	11	3	27	BCL2,DDR1,NF1	0.00136171	biological_process	62
Golgi to endosome transport	Group	11	11	3	27	SORT1,TGOLN2,SLC30A6	0.00136171	biological_process	63
in utero embryonic development	Group	177	177	11	6	CR1L,ITGB1,ADAM10,ACVR1B,TGFBR3,ATP7A,PTPRR,MIB1,FLVCR1,ZMIZ1,MAN2A1	0.00141529	biological_process	64
positive regulation of MAPKKK cascade	Group	40	40	5	12	ITGB1,PTPRC,LEPR,FGFR3,ITGAV	0.00147448	biological_process	65
lipoprotein metabolic process	Group	40	40	5	12	APOL2,APOC1,PCSK9,APOL1,APOL4	0.00147448	biological_process	66
zinc ion transport	Group	24	24	4	16	SLC30A10,SLC39A13,SLC30A6,SLC39A10	0.00149408	biological_process	67
defense response to virus	Group	24	24	4	16	BCL2,PTPRC,BNIP3L,BNIP3	0.00149408	biological_process	68
induction of apoptosis	Group	207	207	12	5	TGM2,BBC3,BNIP3L,ACVR1B,PCSK9,BNIP3,WWOX,SERINC3,TP53INP1,KLF10,ITM2B,BCL2L13	0.00158801	biological_process	69
multicellular organismal development	Group	1080	1080	38	3	RUFY3,PHF3,APOL2,ZFR,TCTN1,SLC2A14,VEGFA,NTRK1,SERPINF1,SEMA3A,LEPR,SPRED1,ITGAV,HOXB3,ID2,FZD5,RELN,SORT1,CUX1,SH2D2A,BST2,PICALM,DNASE2,LRP6,ROBO1,ARID3B,GPR98,RYBP,GRHL1,ROBO2,FLNB,FLVCR1,PLXNB2,FZD3,HEMGN,CREG1,CELSR2,SLCO4C1	0.00161096	biological_process	70
positive regulation of protein amino acid phosphorylation	Group	41	41	5	12	ADAM17,PRKCA,BMPR2,RB1CC1,FAM129A	0.00165049	biological_process	71
glycogen metabolic process	Group	41	41	5	12	PHKB,LAMP2,PYGL,PPP1CB,PPP1R3B	0.00165049	biological_process	72
negative regulation of cell cycle	Group	156	156	10	6	PTCH1,NF1,CDKN1C,WWOX,PDCD4,FHIT,VWA5A,RB1CC1,CTCFL,EXT2	0.00182811	biological_process	73
positive regulation of cell proliferation	Group	332	332	16	4	TSPAN31,VEGFA,ADAM17,BCL2,ITGB1,IGF1R,COL18A1,ADAM10,FGFR3,ITGAV,ID2,LIFR,IL11RA,THRB,SSR1,SHMT2	0.00202514	biological_process	74
protein amino acid O-linked glycosylation	Group	26	26	4	15	GYPC,OGT,TRAK2,GALNT6	0.00203311	biological_process	75
embryonic digit morphogenesis	Group	26	26	4	15	ECE1,LRP6,FLVCR1,CHST11	0.00203311	biological_process	76
chloride transport	Group	63	63	6	9	CLCN3,SLC4A1,GABRG1,CLCN5,PCYOX1,APOL1	0.00211834	biological_process	77
cell redox homeostasis	Group	85	85	7	8	TXNDC16,PRDX5,PDIA3,PDIA6,PDIA4,TXNDC4,TXNDC12	0.00215293	biological_process	78
iron ion transport	Group	45	45	5	11	SLC11A2,TF,HEPH,TFR2,SLC25A37	0.00251129	biological_process	79
heparan sulfate proteoglycan biosynthetic process, polysaccharide chain biosynthetic process	Group	4	4	2	50	EXT2,HS2ST1	0.00259613	biological_process	80
ganglioside catabolic process	Group	4	4	2	50	HEXA,HEXB	0.00259613	biological_process	81
isocitrate metabolic process	Group	4	4	2	50	IDH1,IDH2	0.00259613	biological_process	82
response to aluminum ion	Group	4	4	2	50	BCL2,LONP1	0.00259613	biological_process	83
positive regulation of cell migration	Group	66	66	6	9	ADAM17,IGF1R,COL18A1,ADAM10,PLD1,LAMB1	0.00268647	biological_process	84
negative regulation of epithelial cell proliferation	Group	28	28	4	14	FGFR3,PTCH1,TGFBR3,CDKN1C	0.00269328	biological_process	85
sphingolipid metabolic process	Group	28	28	4	14	SERINC1,PSAP,GBA,SERINC3	0.00269328	biological_process	86
insulin receptor signaling pathway	Group	46	46	5	10	IGF1R,RHOQ,SORBS1,APPL1,EIF4EBP2	0.00276939	biological_process	87
negative regulation of heart contraction	Group	14	14	3	21	PRKCA,ATP1A1,ATP2A2	0.00286555	biological_process	88
positive regulation of axonogenesis	Group	14	14	3	21	ROBO1,ROBO2,PLXNB2	0.00286555	biological_process	89
porphyrin biosynthetic process	Group	14	14	3	21	FECH,CPOX,PPOX	0.00286555	biological_process	90
response to vitamin A	Group	14	14	3	21	CD44,FADS1,MAP1B	0.00286555	biological_process	91
cation transport	Group	90	90	7	7	SLC30A10,ATP1A1,ATP2A2,ATP2A3,ATP2B1,ATP2C1,SLC30A6	0.00297877	biological_process	92
brown fat cell differentiation	Group	29	29	4	13	SCD,BNIP3,ERO1L,ALDH6A1	0.00307268	biological_process	93
phospholipid biosynthetic process	Group	49	49	5	10	SERINC1,MBOAT2,PLD1,HEXB,FADS1	0.0036586	biological_process	94
response to protein stimulus	Group	50	50	5	10	BCL2,DDR1,ID2,MAP1B,KLF10	0.0039958	biological_process	95
endocytosis	Group	147	147	9	6	NPC1,SORT1,PICALM,LRP6,MRC2,CLCN5,NOSTRIN,SCAMP1,LMBR1L	0.0041226	biological_process	96
skeletal muscle tissue development	Group	72	72	6	8	ERBB3,MAPK14,DMD,NF1,FOXP1,FLNB	0.00415581	biological_process	97
maintenance of organ identity	Group	5	5	2	40	GPR98,NPHP3	0.00426639	biological_process	98
negative regulation of astrocyte differentiation	Group	5	5	2	40	NF1,ATF5	0.00426639	biological_process	99
oxygen homeostasis	Group	5	5	2	40	ALAS2,EGLN1	0.00426639	biological_process	100
cellular protein catabolic process	Group	5	5	2	40	PPT1,CLN8	0.00426639	biological_process	101
Ras protein signal transduction	Group	73	73	6	8	MAPK14,NTRK1,PLD1,NF1,RALA,RGL2	0.00444895	biological_process	102
cell migration	Group	97	97	7	7	CD44,FN1,VEGFA,ITGAV,AXL,TGFBR3,LAMC1	0.00451741	biological_process	103
response to organic substance	Group	123	123	8	6	CTSC,BCL2,P2RX1,ACSL1,ABCC4,FADS1,TJP2,ASAH1	0.00465833	biological_process	104
microtubule-based process	Group	52	52	5	9	TUBB2B,MAP1B,KIFAP3,KIF5A,TUBA1A	0.00473582	biological_process	105
triglyceride metabolic process	Group	33	33	4	12	CD36,APOC1,PCSK9,SLC22A4	0.00495378	biological_process	106
palate development	Group	33	33	4	12	TGFBR3,BCOR,ACVR2B,ASPH	0.00495378	biological_process	107
negative regulation of apoptosis	Group	180	180	10	5	VEGFA,BCL2,PRDX5,BNIP3L,BCL6,SORT1,RB1CC1,ASNS,CLN8,CHST11	0.00509998	biological_process	108
response to stress	Group	239	239	12	5	MAPK14,BCL2,HSP90B1,HSPA5,NMU,FADS1,TP53INP1,ERP29,IDH2,RTN3,FAM129A,PRKAB2	0.00510571	biological_process	109
positive regulation of transforming growth factor beta receptor signaling pathway	Group	17	17	3	17	ADAM17,TGFBR3,CDKN1C	0.00510725	biological_process	110
transmembrane receptor protein serine-threonine kinase signaling pathway	Group	17	17	3	17	BMPR2,ACVR1B,ACVR2B	0.00510725	biological_process	111
regulation of the force of heart contraction	Group	17	17	3	17	PRKCA,ATP1A1,ATP2A2	0.00510725	biological_process	112
protein amino acid dephosphorylation	Group	152	152	9	5	BCL2,PTPRC,CDC25C,PTPRR,PTPDC1,PTPRH,PPP1CB,SSH1,PTPRS	0.00512519	biological_process	113
response to organic nitrogen	Group	54	54	5	9	PTGS1,ABCC4,VKORC1,ALDOC,HMGCS1	0.00556826	biological_process	114
response to peptide hormone stimulus	Group	101	101	7	6	BCL2,PRKCA,BSG,ATP2A2,PLD1,LRP6,MAP1B	0.00563041	biological_process	115
cell growth	Group	55	55	5	9	BCL2,FGFR3,CCNG1,TGFBR3,RRAGC	0.00602095	biological_process	116
positive regulation of endothelial cell proliferation	Group	18	18	3	16	POLD4,VEGFA,NF1	0.00603356	biological_process	117
protein localization	Group	78	78	6	7	VPS13C,VPS13D,IMMP2L,HSPG2,BCL6,KIFAP3	0.0061479	biological_process	118
cell-cell adhesion mediated by integrin	Group	6	6	2	33	ITGB1,ADAM9	0.00631027	biological_process	119
positive regulation of G-protein coupled receptor protein signaling pathway	Group	6	6	2	33	ECE1,TMOD2	0.00631027	biological_process	120
endoplasmic reticulum calcium ion homeostasis	Group	6	6	2	33	BCL2,ITPR1	0.00631027	biological_process	121
negative regulation of lipoprotein lipase activity	Group	6	6	2	33	APOC1,SORT1	0.00631027	biological_process	122
monocyte activation	Group	6	6	2	33	ADAM10,ADAM9	0.00631027	biological_process	123
neurotransmitter receptor metabolic process	Group	6	6	2	33	DMD,AGRN	0.00631027	biological_process	124
cellular response to glucose starvation	Group	6	6	2	33	HSPA5,ASNS	0.00631027	biological_process	125
apoptotic cell clearance	Group	6	6	2	33	CD36,ITGAV	0.00631027	biological_process	126
protein thiol-disulfide exchange	Group	6	6	2	33	PIGK,ERO1L	0.00631027	biological_process	127
membrane protein ectodomain proteolysis	Group	19	19	3	15	ADAM17,ERAP1,NCSTN	0.00705376	biological_process	128
N-acetylglucosamine metabolic process	Group	19	19	3	15	MGEA5,HEXB,EXTL2	0.00705376	biological_process	129
response to corticosterone stimulus	Group	19	19	3	15	PTGS1,BCL2,PRKCA	0.00705376	biological_process	130
response to copper ion	Group	19	19	3	15	BCL2,ATP7A,PAM	0.00705376	biological_process	131
lung development	Group	106	106	7	6	VEGFA,FOXP1,CUX1,LAMA5,ACVR2B,DHCR7,ASAH1	0.00729594	biological_process	132
cell aging	Group	37	37	4	10	BCL2,LIMS1,PDCD4,ZMIZ1	0.00748335	biological_process	133
response to insulin stimulus	Group	37	37	4	10	SORT1,FADS1,GGH,ABCC5	0.00748335	biological_process	134
neuron projection development	Group	58	58	5	8	CD44,IGF1R,PHGDH,LAMB1,EFHD1	0.00753339	biological_process	135
chondrocyte differentiation	Group	20	20	3	15	MAPK14,PRKCA,HSPG2	0.00817002	biological_process	136
oxygen transport	Group	20	20	3	15	HBQ1,HBE1,HBZ	0.00817002	biological_process	137
lipid storage	Group	20	20	3	15	HEXA,CD36,HEXB	0.00817002	biological_process	138
neuromuscular process	Group	20	20	3	15	HEXB,AGTPBP1,AARS	0.00817002	biological_process	139
oxygen and reactive oxygen species metabolic process	Group	38	38	4	10	BCL2,EPHX2,BNIP3,PLCB1	0.00822676	biological_process	140
GPI anchor biosynthetic process	Group	38	38	4	10	PIGS,PIGK,PIGN,ALG9	0.00822676	biological_process	141
response to wounding	Group	60	60	5	8	ERBB3,FN1,CTSB,MAP1B,B4GALT1	0.00867726	biological_process	142
positive regulation of filopodium assembly	Group	7	7	2	28	RHOQ,RALA	0.00871131	biological_process	143
very-low-density lipoprotein particle assembly	Group	7	7	2	28	APOC1,FECH	0.00871131	biological_process	144
negative regulation of survival gene product expression	Group	7	7	2	28	BNIP3L,BNIP3	0.00871131	biological_process	145
regulation of cholesterol biosynthetic process	Group	7	7	2	28	CYP51A1,DHCR7	0.00871131	biological_process	146
attachment of GPI anchor to protein	Group	7	7	2	28	PIGS,PIGK	0.00871131	biological_process	147
phosphatidylserine metabolic process	Group	7	7	2	28	SERINC1,SERINC3	0.00871131	biological_process	148
spinal cord development	Group	7	7	2	28	NF1,PHGDH	0.00871131	biological_process	149
response to oxidative stress	Group	137	137	8	5	PTGS1,BCL2,PRDX5,ADAM9,TXNIP,IDH1,SEPP1,ATRN	0.00877327	biological_process	150
nervous system development	Group	422	422	17	4	RUFY3,VEGFA,NTRK1,SEMA3A,RTN4,PPT1,ROBO1,BHLHB2,MAP1B,GPR98,PTPRR,HDAC9,ROBO2,ITM2B,FEZ1,CLN8,TMOD2	0.00889873	biological_process	151
positive regulation of cell growth	Group	39	39	4	10	ADAM17,BCL2,ADAM10,MAP2K5	0.00901694	biological_process	152
copper ion transport	Group	21	21	3	14	HEPH,ATP7A,SLC31A1	0.00938422	biological_process	153
pigmentation	Group	40	40	4	10	NF1,RAB27A,ATP7A,ATRN	0.00985499	biological_process	154
Notch signaling pathway	Group	62	62	5	8	ADAM17,ADAM10,SEL1L,NCSTN,MIB1	0.00993584	biological_process	155
photoreceptor cell maintenance	Group	22	22	3	13	GPR98,CLN8,NPHP3	0.010698	biological_process	156
spleen development	Group	22	22	3	13	ADAM17,BCL2,FLVCR1	0.010698	biological_process	157
humoral immune response	Group	41	41	4	9	BCL2,ST6GAL1,MNX1,BST2	0.010742	biological_process	158
negative regulation of cell-matrix adhesion	Group	8	8	2	25	NF1,BCL6	0.0114536	biological_process	159
negative regulation of axon extension	Group	8	8	2	25	SEMA3A,RTN4	0.0114536	biological_process	160
positive regulation of exocytosis	Group	8	8	2	25	PRKCA,CADPS2	0.0114536	biological_process	161
positive regulation of leukocyte migration	Group	8	8	2	25	MIA3,VEGFA	0.0114536	biological_process	162
regulation of glycogen catabolic process	Group	8	8	2	25	PPP1CB,PPP1R3B	0.0114536	biological_process	163
Notch receptor processing	Group	8	8	2	25	ADAM10,NCSTN	0.0114536	biological_process	164
regulation of protein homodimerization activity	Group	8	8	2	25	BCL2,ICA1	0.0114536	biological_process	165
positive thymic T cell selection	Group	8	8	2	25	PTPRC,CD3D	0.0114536	biological_process	166
taurine metabolic process	Group	8	8	2	25	PHGDH,CSAD	0.0114536	biological_process	167
L-serine biosynthetic process	Group	8	8	2	25	PHGDH,SHMT2	0.0114536	biological_process	168
glycine metabolic process	Group	8	8	2	25	PHGDH,SHMT2	0.0114536	biological_process	169
germinal center formation	Group	8	8	2	25	ADAM17,BCL6	0.0114536	biological_process	170
maternal process involved in pregnancy	Group	8	8	2	25	APOL2,IL11RA	0.0114536	biological_process	171
penetration of zona pellucida	Group	8	8	2	25	HEXB,B4GALT1	0.0114536	biological_process	172
response to tumor necrosis factor	Group	8	8	2	25	ADAM10,ADAM9	0.0114536	biological_process	173
response to mercury ion	Group	8	8	2	25	BSG,CPOX	0.0114536	biological_process	174
response to sucrose stimulus	Group	8	8	2	25	FADS1,GFPT1	0.0114536	biological_process	175
protein amino acid glycosylation	Group	89	89	6	6	FUT1,ST6GAL1,ST6GALNAC1,STT3B,UGCGL2,UGCGL1	0.0114719	biological_process	176
mammary gland development	Group	42	42	4	9	DDR1,IGF1R,PTCH1,B4GALT1	0.0116789	biological_process	177
negative regulation of neuron apoptosis	Group	65	65	5	7	ERBB3,BCL2,NTRK1,PPT1,AARS	0.01205	biological_process	178
regulation of cell shape	Group	65	65	5	7	PALMD,FN1,VEGFA,RHOQ,EPB41	0.01205	biological_process	179
cell-matrix adhesion	Group	90	90	6	6	CD44,FN1,ITGB1,ADAM9,ITGAV,ITGB5	0.0120785	biological_process	180
locomotory behavior	Group	90	90	6	6	HEXA,SEPP1,RELN,HEXB,ATP7A,APLP2	0.0120785	biological_process	181
angiogenesis	Group	145	145	8	5	VEGFA,MAPK14,COL18A1,LEPR,ITGAV,RTN4,FZD5,SH2D2A	0.0120986	biological_process	182
glycosaminoglycan metabolic process	Group	23	23	3	13	GNS,HEXA,HEXB	0.0121128	biological_process	183
positive regulation of smooth muscle cell proliferation	Group	43	43	4	9	VEGFA,TGM2,PRKCA,ABCC4	0.0126666	biological_process	184
interspecies interaction between organisms	Group	239	239	11	4	CD80,ITGB1,BNIP3L,ITGAV,CDC25C,F11R,CD46,BNIP3,RALA,APOBEC3G,RTN3	0.0131901	biological_process	185
regulation of apoptosis	Group	177	177	9	5	BCL2,IGF2R,CTSB,BBC3,PTPRC,BNIP3L,RTN4,TNFRSF10B,BCL2L13	0.013231	biological_process	186
positive regulation of glucose import	Group	24	24	3	12	ERBB3,MGEA5,SORBS1	0.0136298	biological_process	187
protein secretion	Group	24	24	3	12	CANX,PDIA4,ERP29	0.0136298	biological_process	188
apoptosis	Group	550	550	20	3	BCL2,SEMA3A,BBC3,BNIP3L,P2RX1,DAPK1,ECE1,LSP1,EGLN3,LITAF,DNASE2,PDCD4,RYBP,TP53INP1,PTPRH,ALDOC,RTN3,ITM2B,BCL2L13,RRAGC	0.0138461	biological_process	189
blood coagulation	Group	93	93	6	6	CD36,TFPI,CD59,PROS1,RAB27A,LMAN1	0.0140334	biological_process	190
liver development	Group	68	68	5	7	PCSK9,NF1,TGFBR3,RB1CC1,MAN2A1	0.0144502	biological_process	191
cerebellar Purkinje cell differentiation	Group	9	9	2	22	ATP7A,AGTPBP1	0.0145216	biological_process	192
negative regulation of glucose import	Group	9	9	2	22	PRKCA,RHOQ	0.0145216	biological_process	193
regulation of glycogen biosynthetic process	Group	9	9	2	22	PPP1CB,PPP1R3B	0.0145216	biological_process	194
estrogen metabolic process	Group	9	9	2	22	COMT,HSD17B8	0.0145216	biological_process	195
L-serine metabolic process	Group	9	9	2	22	PHGDH,SHMT2	0.0145216	biological_process	196
cellular macromolecule catabolic process	Group	9	9	2	22	PPT1,CLN8	0.0145216	biological_process	197
definitive hemopoiesis	Group	9	9	2	22	HOXB3,TGFBR3	0.0145216	biological_process	198
brain development	Group	151	151	8	5	IGF1R,HSPG2,NF1,SEPP1,PPT1,RELN,PHGDH,ROBO2	0.015141	biological_process	199
neuron projection morphogenesis	Group	25	25	3	12	ITGB1,LIFR,ATP7A	0.0152499	biological_process	200
protein polyubiquitination	Group	25	25	3	12	BCL2,AMFR,DZIP3	0.0152499	biological_process	201
regulation of cell cycle	Group	69	69	5	7	BCL2,ITGB1,PTPRC,CSNK2A2,ATF5	0.0153165	biological_process	202
wound healing	Group	69	69	5	7	MIA3,ERBB3,FN1,NF1,B4GALT1	0.0153165	biological_process	203
release of cytochrome c from mitochondria	Group	26	26	3	11	BCL2,BBC3,ATP7A	0.0169738	biological_process	204
ureteric bud branching	Group	26	26	3	11	CD44,BCL2,LAMA5	0.0169738	biological_process	205
odontogenesis	Group	26	26	3	11	ERBB3,BCOR,LAMB1	0.0169738	biological_process	206
organ morphogenesis	Group	185	185	9	4	DGCR2,BCL2,IGF1R,COL18A1,PTCH1,GYPC,LAMA5,TLE2,THRB	0.0171856	biological_process	207
cell proliferation	Group	385	385	15	3	VEGFA,BCL2,SERPINF1,CDC25C,PTCH1,GAS6,INSIG1,AXL,LRPAP1,SH2D2A,BST2,LAMP3,APPL1,FZD3,CREG1	0.0176845	biological_process	208
negative regulation of programmed cell death	Group	10	10	2	20	VEGFA,AMIGO2	0.0179005	biological_process	209
positive regulation of erythrocyte differentiation	Group	10	10	2	20	MAPK14,ACVR1B	0.0179005	biological_process	210
cellular ion homeostasis	Group	10	10	2	20	SLC4A1,RHAG	0.0179005	biological_process	211
positive regulation of transferase activity	Group	10	10	2	20	SERINC1,SERINC3	0.0179005	biological_process	212
porphyrin metabolic process	Group	10	10	2	20	ALAS2,PPOX	0.0179005	biological_process	213
oligosaccharide biosynthetic process	Group	10	10	2	20	ST6GALNAC1,B4GALT1	0.0179005	biological_process	214
exocytosis	Group	72	72	5	6	RAB27A,EXOC4,SCAMP1,CADPS2,SYTL5	0.0181214	biological_process	215
protein homotetramerization	Group	27	27	3	11	GFPT1,ALDOC,SHMT2	0.0188021	biological_process	216
endoplasmic reticulum unfolded protein response	Group	27	27	3	11	AMFR,ERO1L,AARS	0.0188021	biological_process	217
regulation of blood pressure	Group	73	73	5	6	PTGS1,P2RX1,ATP1A1,ERAP1,ACSM3	0.0191267	biological_process	218
regulation of transcription	Group	533	533	19	3	MBTD1,HMBOX1,DMD,ACVR1B,HOXB3,NFATC1,ID2,KLF9,FADS1,CUX1,MNX1,MYCL1,TLE2,BHLHB2,ACVR2B,KLF10,GRHL1,MLXIP,TCEA1	0.0194336	biological_process	219
embryonic development	Group	101	101	6	5	CCDC47,HMGCR,ACVR1B,FOXP1,MAP1B,APLP2	0.0203011	biological_process	220
cellular iron ion homeostasis	Group	50	50	4	8	TF,ABCB7,TFR2,ALAS2	0.021075	biological_process	221
positive regulation of macrophage fusion	Group	1	1	1	100	ADAM9	0.0211143	biological_process	222
positive regulation of calcium-dependent cell-cell adhesion	Group	1	1	1	100	KIFAP3	0.0211143	biological_process	223
negative regulation of cellular pH reduction	Group	1	1	1	100	BCL2	0.0211143	biological_process	224
negative regulation of neurotransmitter secretion	Group	1	1	1	100	NF1	0.0211143	biological_process	225
negative regulation of activation of membrane attack complex	Group	1	1	1	100	CD59	0.0211143	biological_process	226
negative regulation of striated muscle cell differentiation	Group	1	1	1	100	EZH2	0.0211143	biological_process	227
negative regulation of epithelial cell migration	Group	1	1	1	100	TGFBR3	0.0211143	biological_process	228
negative regulation of osteoblast proliferation	Group	1	1	1	100	BCL2	0.0211143	biological_process	229
negative regulation of protein amino acid glycosylation	Group	1	1	1	100	MGEA5	0.0211143	biological_process	230
negative regulation of glucocorticoid biosynthetic process	Group	1	1	1	100	ATP1A1	0.0211143	biological_process	231
negative regulation of norepinephrine secretion	Group	1	1	1	100	PTGS1	0.0211143	biological_process	232
positive regulation of myelination	Group	1	1	1	100	TF	0.0211143	biological_process	233
cytotoxic T cell degranulation	Group	1	1	1	100	RAB27A	0.0211143	biological_process	234
positive regulation of neutrophil apoptosis	Group	1	1	1	100	CD44	0.0211143	biological_process	235
positive regulation of skeletal muscle fiber development	Group	1	1	1	100	BCL2	0.0211143	biological_process	236
positive regulation of epithelial cell proliferation involved in wound healing	Group	1	1	1	100	B4GALT1	0.0211143	biological_process	237
positive regulation of homocysteine metabolic process	Group	1	1	1	100	COMT	0.0211143	biological_process	238
positive regulation of gene-specific transcription involved in unfolded protein response	Group	1	1	1	100	ATF6	0.0211143	biological_process	239
regulation of memory T cell differentiation	Group	1	1	1	100	BCL6	0.0211143	biological_process	240
induction of synaptic plasticity by chemical substance	Group	1	1	1	100	MAP1B	0.0211143	biological_process	241
regulation of acrosome reaction	Group	1	1	1	100	B4GALT1	0.0211143	biological_process	242
regulation of oxidative phosphorylation	Group	1	1	1	100	ATP7A	0.0211143	biological_process	243
endothelin maturation	Group	1	1	1	100	ECE1	0.0211143	biological_process	244
Golgi calcium ion homeostasis	Group	1	1	1	100	ATP2C1	0.0211143	biological_process	245
negative regulation of membrane potential	Group	1	1	1	100	BNIP3	0.0211143	biological_process	246
primitive erythrocyte differentiation	Group	1	1	1	100	VEGFA	0.0211143	biological_process	247
definitive erythrocyte differentiation	Group	1	1	1	100	TGFBR3	0.0211143	biological_process	248
regulation of systemic arterial blood pressure by ischemic conditions	Group	1	1	1	100	TNNI3	0.0211143	biological_process	249
positive regulation of vascular permeability	Group	1	1	1	100	VEGFA	0.0211143	biological_process	250
negative regulation of metalloenzyme activity	Group	1	1	1	100	ATP7A	0.0211143	biological_process	251
CD8-positive, alpha-beta T cell lineage commitment	Group	1	1	1	100	BCL2	0.0211143	biological_process	252
serotonin secretion by platelet	Group	1	1	1	100	P2RX1	0.0211143	biological_process	253
vitellogenesis	Group	1	1	1	100	ZMIZ1	0.0211143	biological_process	254
forebrain astrocyte development	Group	1	1	1	100	NF1	0.0211143	biological_process	255
cardioblast cell fate specification	Group	1	1	1	100	ITGB1	0.0211143	biological_process	256
Golgi calcium ion transport	Group	1	1	1	100	ATP2C1	0.0211143	biological_process	257
mitochondrial iron ion transport	Group	1	1	1	100	SLC25A37	0.0211143	biological_process	258
5-phosphoribose 1-diphosphate biosynthetic process	Group	1	1	1	100	PYGL	0.0211143	biological_process	259
galactose catabolic process	Group	1	1	1	100	GLB1	0.0211143	biological_process	260
hydroxylysine biosynthetic process	Group	1	1	1	100	PLOD1	0.0211143	biological_process	261
valine catabolic process	Group	1	1	1	100	ALDH6A1	0.0211143	biological_process	262
arginine catabolic process to ornithine	Group	1	1	1	100	ARG2	0.0211143	biological_process	263
beta-alanine catabolic process	Group	1	1	1	100	ALDH6A1	0.0211143	biological_process	264
vitamin K biosynthetic process	Group	1	1	1	100	VKORC1	0.0211143	biological_process	265
keratan sulfate catabolic process	Group	1	1	1	100	GNS	0.0211143	biological_process	266
galactosylceramide catabolic process	Group	1	1	1	100	GALC	0.0211143	biological_process	267
oxidation-dependent protein catabolic process	Group	1	1	1	100	LONP1	0.0211143	biological_process	268
diadenosine triphosphate catabolic process	Group	1	1	1	100	FHIT	0.0211143	biological_process	269
farnesyl diphosphate biosynthetic process, mevalonate pathway	Group	1	1	1	100	HMGCR	0.0211143	biological_process	270
protein depalmitoylation	Group	1	1	1	100	PPT1	0.0211143	biological_process	271
peptidyl-aspartic acid hydroxylation	Group	1	1	1	100	ASPH	0.0211143	biological_process	272
peptidyl-lysine hydroxylation	Group	1	1	1	100	PLOD1	0.0211143	biological_process	273
protein amino acid auto-ADP-ribosylation	Group	1	1	1	100	TNKS	0.0211143	biological_process	274
protein amino acid poly-ADP-ribosylation	Group	1	1	1	100	TNKS	0.0211143	biological_process	275
quinolinate catabolic process	Group	1	1	1	100	QPRT	0.0211143	biological_process	276
copper ion export	Group	1	1	1	100	ATP7A	0.0211143	biological_process	277
neural plate anterioposterior pattern formation	Group	1	1	1	100	CELSR2	0.0211143	biological_process	278
cochlear nucleus development	Group	1	1	1	100	BCL2	0.0211143	biological_process	279
hydroxyproline transport	Group	1	1	1	100	SLC1A4	0.0211143	biological_process	280
threonine transport	Group	1	1	1	100	SLC1A4	0.0211143	biological_process	281
ferric iron transport	Group	1	1	1	100	TF	0.0211143	biological_process	282
mevalonate transport	Group	1	1	1	100	SLC16A1	0.0211143	biological_process	283
polysaccharide localization	Group	1	1	1	100	CHST11	0.0211143	biological_process	284
constitutive protein ectodomain proteolysis	Group	1	1	1	100	ADAM10	0.0211143	biological_process	285
male courtship behavior	Group	1	1	1	100	HEXB	0.0211143	biological_process	286
detection of UV	Group	1	1	1	100	FECH	0.0211143	biological_process	287
response to luteinizing hormone stimulus	Group	1	1	1	100	TGFBR3	0.0211143	biological_process	288
response to cesium	Group	1	1	1	100	CYP2R1	0.0211143	biological_process	289
response to high density lipoprotein stimulus	Group	1	1	1	100	ADAM17	0.0211143	biological_process	290
prostaglandin production during acute inflammatory response	Group	1	1	1	100	EPHX2	0.0211143	biological_process	291
neural tube formation	Group	11	11	2	18	PTCH1,MIB1	0.0215757	biological_process	292
positive regulation of alpha-beta T cell proliferation	Group	11	11	2	18	CD80,PTPRC	0.0215757	biological_process	293
ER overload response	Group	11	11	2	18	CCDC47,HSPA5	0.0215757	biological_process	294
regulation of establishment of protein localization	Group	11	11	2	18	RHOQ,APPL1	0.0215757	biological_process	295
germ cell migration	Group	11	11	2	18	ITGB1,HMGCR	0.0215757	biological_process	296
axonal fasciculation	Group	11	11	2	18	SEMA3A,NCAM2	0.0215757	biological_process	297
mannose metabolic process	Group	11	11	2	18	MAN2B2,MAN2A1	0.0215757	biological_process	298
N-glycan processing	Group	11	11	2	18	GANAB,MAN2A1	0.0215757	biological_process	299
glycoprotein catabolic process	Group	11	11	2	18	MGEA5,MANBA	0.0215757	biological_process	300
smooth muscle tissue development	Group	11	11	2	18	NF1,FOXP1	0.0215757	biological_process	301
decidualization	Group	11	11	2	18	BSG,IL11RA	0.0215757	biological_process	302
oligosaccharide metabolic process	Group	11	11	2	18	MAN1B1,ST6GAL1	0.0215757	biological_process	303
neuromuscular process controlling posture	Group	11	11	2	18	HEXA,CLN8	0.0215757	biological_process	304
integrin-mediated signaling pathway	Group	103	103	6	5	ADAM17,ITGB1,ADAM10,ADAM9,ITGAV,ITGB5	0.0221229	biological_process	305
receptor-mediated endocytosis	Group	51	51	4	7	IGF2R,PPT1,PICALM,CLTCL1	0.022498	biological_process	306
vasculogenesis	Group	51	51	4	7	VEGFA,TNNI3,ITGAV,ZMIZ1	0.022498	biological_process	307
isoprenoid biosynthetic process	Group	29	29	3	10	HMGCR,GGPS1,HMGCS1	0.0227731	biological_process	308
metanephros development	Group	29	29	3	10	BCL2,NF1,ROBO2	0.0227731	biological_process	309
hair follicle development	Group	29	29	3	10	ACVR1B,LAMA5,AARS	0.0227731	biological_process	310
protein amino acid N-linked glycosylation	Group	30	30	3	10	MAN1B1,GYPC,MGAT3	0.0249161	biological_process	311
developmental growth	Group	30	30	3	10	BCL2,ZMIZ1,CHST11	0.0249161	biological_process	312
peripheral nervous system development	Group	30	30	3	10	ERBB3,SERPINI1,NF1	0.0249161	biological_process	313
dephosphorylation	Group	106	106	6	5	PTPRC,PTPRR,PTPDC1,SSH1,PTPRS,SBF2	0.0250572	biological_process	314
positive regulation of cell motion	Group	12	12	2	16	ADAM17,BCL6	0.0255334	biological_process	315
regulation of T cell activation	Group	12	12	2	16	SH2D2A,IL20RB	0.0255334	biological_process	316
phosphoinositide 3-kinase cascade	Group	12	12	2	16	IGF1R,NF1	0.0255334	biological_process	317
regulation of mitochondrial membrane permeability	Group	12	12	2	16	BCL2,BNIP3	0.0255334	biological_process	318
cellular copper ion homeostasis	Group	12	12	2	16	ATP7A,APLP2	0.0255334	biological_process	319
peptide metabolic process	Group	12	12	2	16	Pgcp,PAM	0.0255334	biological_process	320
ceramide biosynthetic process	Group	12	12	2	16	P2RX1,CLN8	0.0255334	biological_process	321
glycosphingolipid metabolic process	Group	12	12	2	16	PSAP,HEXB	0.0255334	biological_process	322
energy reserve metabolic process	Group	12	12	2	16	LEPR,GFPT1	0.0255334	biological_process	323
response to estradiol stimulus	Group	79	79	5	6	PRKCA,PTCH1,TXNIP,MAP1B,PAM	0.0259285	biological_process	324
cartilage development	Group	54	54	4	7	HOXB3,SOX5,ATP7A,CHST11	0.0271118	biological_process	325
collagen fibril organization	Group	31	31	3	9	NF1,ATP7A,P4HA1	0.0271637	biological_process	326
blood vessel remodeling	Group	31	31	3	9	VEGFA,TGM2,ATP7A	0.0271637	biological_process	327
organic anion transport	Group	31	31	3	9	SLCO1A2,SLC16A1,SLCO4C1	0.0271637	biological_process	328
response to inorganic substance	Group	31	31	3	9	BCL2,CPOX,MAP1B	0.0271637	biological_process	329
protein transport	Group	556	556	19	3	CCDC91,SNX14,HSP90B1,IGF2R,PPT1,RAB27A,LMAN1,TNKS,NUP210,SEC63,EXOC4,SCAMP1,RAB43,SIL1,CADPS2,RAB11FIP1,LMAN2,TMED10,SNX30	0.028369	biological_process	330
negative regulation of transcription, DNA-dependent	Group	110	110	6	5	TRIM66,BCOR,BHLHB2,HDAC9,NOSTRIN,SMARCC2	0.0293576	biological_process	331
positive regulation of catalytic activity	Group	32	32	3	9	BCL2,ATP7A,NCSTN	0.0295159	biological_process	332
negative regulation of axonogenesis	Group	13	13	2	15	RUFY3,RTN4	0.02976	biological_process	333
positive regulation of T cell mediated cytotoxicity	Group	13	13	2	15	PTPRC,B2M	0.02976	biological_process	334
positive regulation of protein secretion	Group	13	13	2	15	KCNN4,ADAM9	0.02976	biological_process	335
regulation of fatty acid oxidation	Group	13	13	2	15	ACSL1,PRKAB2	0.02976	biological_process	336
cardiac muscle cell differentiation	Group	13	13	2	15	ITGB1,FOXP1	0.02976	biological_process	337
cognition	Group	13	13	2	15	NF1,SLC1A4	0.02976	biological_process	338
cell death	Group	82	82	5	6	BCL2,ITPR1,BNIP3,OPTN,ATP6AP1	0.0298415	biological_process	339
cell morphogenesis	Group	56	56	4	7	MAPK14,BCL2,BCL6,SSH1	0.0304789	biological_process	340
amino acid transport	Group	56	56	4	7	XK,SLC7A1,SLC38A1,SLC43A1	0.0304789	biological_process	341
response to mechanical stimulus	Group	56	56	4	7	PRKCA,PTCH1,TXNIP,MAP1B	0.0304789	biological_process	342
regulation of muscle contraction	Group	33	33	3	9	PRKCA,TNNI3,ATP2A2	0.0319721	biological_process	343
branching morphogenesis of a tube	Group	33	33	3	9	VEGFA,LAMA5,B4GALT1	0.0319721	biological_process	344
activation of caspase activity	Group	57	57	4	7	BBC3,P2RX1,TNFRSF10B,BCL2L13	0.0322507	biological_process	345
G1-S transition of mitotic cell cycle	Group	57	57	4	7	BCL2,ITGB1,ACVR1B,NFATC1	0.0322507	biological_process	346
transmembrane receptor protein tyrosine kinase signaling pathway	Group	113	113	6	5	ERBB3,FN1,DDR1,IGF1R,NTRK1,NCOA4	0.0328828	biological_process	347
induction of positive chemotaxis	Group	14	14	2	14	VEGFA,PRKCA	0.0342425	biological_process	348
cellular response to starvation	Group	14	14	2	14	PCSK9,FADS1	0.0342425	biological_process	349
artery morphogenesis	Group	14	14	2	14	NF1,ZMIZ1	0.0342425	biological_process	350
phospholipid efflux	Group	14	14	2	14	APOC1,ABCA7	0.0342425	biological_process	351
response to iron ion	Group	14	14	2	14	BCL2,SLC11A2	0.0342425	biological_process	352
skin development	Group	34	34	3	8	DDR1,ATP7A,AARS	0.0345318	biological_process	353
chemotaxis	Group	145	145	7	4	MAPK14,PLD1,FER,LSP1,RALA,ROBO1,ROBO2	0.0346434	biological_process	354
negative regulation of cell growth	Group	86	86	5	5	BCL2,BBC3,ACVR1B,PPT1,BCL6	0.0356091	biological_process	355
negative regulation of cell adhesion	Group	35	35	3	8	MIA3,ERBB3,ADAM10	0.0371943	biological_process	356
metal ion transport	Group	35	35	3	8	SLC39A13,ATP7A,SLC39A10	0.0371943	biological_process	357
response to nutrient	Group	117	117	6	5	C6orf26,BCL2,ACSL1,PKLR,FADS1,OGT	0.0379941	biological_process	358
cortical actin cytoskeleton organization	Group	15	15	2	13	RHOQ,EPB41	0.038968	biological_process	359
dendrite morphogenesis	Group	15	15	2	13	ATP7A,CELSR2	0.038968	biological_process	360
ER-associated protein catabolic process	Group	15	15	2	13	MAN1B1,AMFR	0.038968	biological_process	361
phosphoinositide metabolic process	Group	15	15	2	13	NUDT4,PLCB1	0.038968	biological_process	362
response to ATP	Group	15	15	2	13	P2RX1,PKLR	0.038968	biological_process	363
hemidesmosome assembly	Group	2	2	1	50	LAMC1	0.0417835	biological_process	364
negative regulation of mitochondrial depolarization	Group	2	2	1	50	BCL2	0.0417835	biological_process	365
negative regulation of retinal cell programmed cell death	Group	2	2	1	50	BCL2	0.0417835	biological_process	366
negative regulation of epithelial to mesenchymal transition	Group	2	2	1	50	TGFBR3	0.0417835	biological_process	367
negative regulation of dopamine metabolic process	Group	2	2	1	50	COMT	0.0417835	biological_process	368
negative regulation of glycogen biosynthetic process	Group	2	2	1	50	GFPT1	0.0417835	biological_process	369
negative regulation of type IV hypersensitivity	Group	2	2	1	50	IL20RB	0.0417835	biological_process	370
negative regulation of mast cell cytokine production	Group	2	2	1	50	BCL6	0.0417835	biological_process	371
negative regulation of interleukin-8 production	Group	2	2	1	50	ADAM17	0.0417835	biological_process	372
negative regulation of cardiac muscle adaptation	Group	2	2	1	50	MGEA5	0.0417835	biological_process	373
negative regulation of epinephrine secretion	Group	2	2	1	50	PTGS1	0.0417835	biological_process	374
positive regulation of neuron maturation	Group	2	2	1	50	BCL2	0.0417835	biological_process	375
positive regulation of small GTPase mediated signal transduction	Group	2	2	1	50	RELN	0.0417835	biological_process	376
natural killer cell degranulation	Group	2	2	1	50	RAB27A	0.0417835	biological_process	377
positive regulation of apoptosis involved in mammary gland involution	Group	2	2	1	50	B4GALT1	0.0417835	biological_process	378
positive regulation of pinocytosis	Group	2	2	1	50	PPT1	0.0417835	biological_process	379
positive regulation of receptor recycling	Group	2	2	1	50	ECE1	0.0417835	biological_process	380
regulation of B cell receptor signaling pathway	Group	2	2	1	50	PTPRC	0.0417835	biological_process	381
positive regulation of striated muscle contraction	Group	2	2	1	50	ATP1A1	0.0417835	biological_process	382
regulation of mast cell apoptosis	Group	2	2	1	50	ADAM17	0.0417835	biological_process	383
leptin-mediated signaling pathway	Group	2	2	1	50	LEPR	0.0417835	biological_process	384
immune response-inhibiting signal transduction	Group	2	2	1	50	IL20RB	0.0417835	biological_process	385
angiotensin maturation	Group	2	2	1	50	ATP6AP2	0.0417835	biological_process	386
endosomal lumen acidification	Group	2	2	1	50	CLCN3	0.0417835	biological_process	387
regulation of lung blood pressure	Group	2	2	1	50	BMPR2	0.0417835	biological_process	388
androgen catabolic process	Group	2	2	1	50	HSD17B11	0.0417835	biological_process	389
glutamate uptake during transmission of nerve impulse	Group	2	2	1	50	CLN8	0.0417835	biological_process	390
regulation of phospholipase A2 activity	Group	2	2	1	50	PPT1	0.0417835	biological_process	391
necrotic cell death	Group	2	2	1	50	MGEA5	0.0417835	biological_process	392
endothelial cell morphogenesis	Group	2	2	1	50	COL18A1	0.0417835	biological_process	393
mitochondrial DNA metabolic process	Group	2	2	1	50	LONP1	0.0417835	biological_process	394
plasma membrane to endosome transport	Group	2	2	1	50	SORT1	0.0417835	biological_process	395
protein targeting to Golgi	Group	2	2	1	50	OPTN	0.0417835	biological_process	396
sarcoplasmic reticulum calcium ion transport	Group	2	2	1	50	ATP2A2	0.0417835	biological_process	397
endosome transport via multivesicular body sorting pathway	Group	2	2	1	50	SORT1	0.0417835	biological_process	398
epinephrine metabolic process	Group	2	2	1	50	ATP7A	0.0417835	biological_process	399
taurine biosynthetic process	Group	2	2	1	50	CSAD	0.0417835	biological_process	400
spermine catabolic process	Group	2	2	1	50	SAT1	0.0417835	biological_process	401
L-cysteine catabolic process to taurine	Group	2	2	1	50	CSAD	0.0417835	biological_process	402
tryptophanyl-tRNA aminoacylation	Group	2	2	1	50	WARS	0.0417835	biological_process	403
asparagine biosynthetic process	Group	2	2	1	50	ASNS	0.0417835	biological_process	404
glycine biosynthetic process from serine	Group	2	2	1	50	SHMT2	0.0417835	biological_process	405
threonine metabolic process	Group	2	2	1	50	PHGDH	0.0417835	biological_process	406
thymine metabolic process	Group	2	2	1	50	ALDH6A1	0.0417835	biological_process	407
ketone body biosynthetic process	Group	2	2	1	50	HMGCL	0.0417835	biological_process	408
glucosamine biosynthetic process	Group	2	2	1	50	GFPT1	0.0417835	biological_process	409
lactose biosynthetic process	Group	2	2	1	50	B4GALT1	0.0417835	biological_process	410
heparin metabolic process	Group	2	2	1	50	HS2ST1	0.0417835	biological_process	411
O-glycoside catabolic process	Group	2	2	1	50	FUCA1	0.0417835	biological_process	412
prenylated protein catabolic process	Group	2	2	1	50	PCYOX1	0.0417835	biological_process	413
protein deglycosylation	Group	2	2	1	50	AGA	0.0417835	biological_process	414
nuclear-transcribed mRNA catabolic process, exonucleolytic	Group	2	2	1	50	PAN2	0.0417835	biological_process	415
isopeptide cross-linking via N6-(L-isoglutamyl)-L-lysine	Group	2	2	1	50	TGM2	0.0417835	biological_process	416
selenium metabolic process	Group	2	2	1	50	SEPP1	0.0417835	biological_process	417
cellular response to unfolded protein	Group	2	2	1	50	AARS	0.0417835	biological_process	418
copper ion import	Group	2	2	1	50	ATP7A	0.0417835	biological_process	419
age-dependent response to oxidative stress	Group	2	2	1	50	CLN8	0.0417835	biological_process	420
specification of axis polarity	Group	2	2	1	50	BCOR	0.0417835	biological_process	421
xenobiotic transport	Group	2	2	1	50	SLC2A1	0.0417835	biological_process	422
glutamine transport	Group	2	2	1	50	SLC38A1	0.0417835	biological_process	423
inorganic diphosphate transport	Group	2	2	1	50	ENPP3	0.0417835	biological_process	424
ferrous iron transport	Group	2	2	1	50	SLC11A2	0.0417835	biological_process	425
immunoglobulin biosynthetic process	Group	2	2	1	50	PTPRC	0.0417835	biological_process	426
response to hydrostatic pressure	Group	2	2	1	50	COL18A1	0.0417835	biological_process	427
response to follicle-stimulating hormone stimulus	Group	2	2	1	50	TGFBR3	0.0417835	biological_process	428
response to iron(III) ion	Group	2	2	1	50	ATP7A	0.0417835	biological_process	429
cell communication	Group	120	120	6	5	SNX14,PLD1,NF1,GPR98,PXK,SNX30	0.0421423	biological_process	430
tissue regeneration	Group	37	37	3	8	GAS6,AXL,Pgcp	0.0428242	biological_process	431
response to steroid hormone stimulus	Group	37	37	3	8	BCL2,IDH1,MGEA5	0.0428242	biological_process	432
negative regulation of cell proliferation	Group	324	324	12	3	BCL2,PRKCA,DDR1,COL18A1,FGFR3,NF1,BCL6,WARS,KIFAP3,KLF10,ASPH,B4GALT1	0.0437089	biological_process	433
protein tetramerization	Group	16	16	2	12	IGF1R,SBF2	0.0439246	biological_process	434
negative regulation of transforming growth factor beta receptor signaling pathway	Group	16	16	2	12	TGFBR3,CHST11	0.0439246	biological_process	435
vascular endothelial growth factor receptor signaling pathway	Group	16	16	2	12	VEGFA,BMPR2	0.0439246	biological_process	436
regulation of protein catabolic process	Group	16	16	2	12	SERPINB1,CAST	0.0439246	biological_process	437
response to unfolded protein	Group	63	63	4	6	C6orf26,ATF6,TXNDC4,CREB3L2	0.0441271	biological_process	438
mesoderm development	Group	38	38	3	7	VEGFA,ACVR1B,ACVR2B	0.0457897	biological_process	439
cell-cell adhesion	Group	123	123	6	4	FAT,CD44,BCL2,ICAM2,ICAM4,GPR98	0.0465649	biological_process	440
negative regulation of transcription from RNA polymerase II promoter	Group	293	293	11	3	ID2,CDKN1C,BCL6,FOXP1,CUX1,MTDH,RYBP,HDAC9,KLF10,HBZ,IRF2BP2	0.048013	biological_process	441
response to glucose stimulus	Group	65	65	4	6	TXNIP,PKLR,PFKFB2,ACVR2B	0.0485615	biological_process	442
induction of apoptosis by extracellular signals	Group	39	39	3	7	PRKCA,DAPK1,SORT1	0.0488541	biological_process	443
complement activation, classical pathway	Group	39	39	3	7	CD55,CD46,C1RL	0.0488541	biological_process	444
peptidyl-serine phosphorylation	Group	39	39	3	7	BCL2,PRKCA,TNKS	0.0488541	biological_process	445
steroid metabolic process	Group	94	94	5	5	INSIG1,PCSK9,WWOX,MBTPS2,APOL1	0.0490815	biological_process	446
positive regulation of smooth muscle contraction	Group	17	17	2	11	PTGS1,NMU	0.0491002	biological_process	447
negative regulation of MAP kinase activity	Group	17	17	2	11	HMGCR,NF1	0.0491002	biological_process	448
actin cytoskeleton reorganization	Group	17	17	2	11	RALA,ATP2C1	0.0491002	biological_process	449
carbohydrate biosynthetic process	Group	17	17	2	11	GFPT1,CHST11	0.0491002	biological_process	450
tissue remodeling	Group	17	17	2	11	GAS6,AXL	0.0491002	biological_process	451
positive regulation of I-kappaB kinase-NF-kappaB cascade	Group	96	96	5	5	TGM2,TNFRSF10B,BST2,LITAF,ATP2C1	0.0528592	biological_process	452
small GTPase mediated signal transduction	Group	263	263	10	3	RHOBTB1,RALGPS2,IQGAP1,RHOQ,RAB27A,RALA,RGL2,RAB43,PDK1,RRAGC	0.0537562	biological_process	453
negative regulation of protein amino acid phosphorylation	Group	18	18	2	11	PRKCA,FAM129A	0.0544836	biological_process	454
positive regulation of translation	Group	18	18	2	11	FAM129A,SAMD4A	0.0544836	biological_process	455
negative regulation of catalytic activity	Group	18	18	2	11	CAST,PCSK9	0.0544836	biological_process	456
glycosaminoglycan biosynthetic process	Group	18	18	2	11	GALNT5,EXT2	0.0544836	biological_process	457
fatty acid oxidation	Group	18	18	2	11	MAPK14,CD36	0.0544836	biological_process	458
organ growth	Group	18	18	2	11	BCL2,ACVR2B	0.0544836	biological_process	459
response to pain	Group	18	18	2	11	COMT,RELN	0.0544836	biological_process	460
regulation of transcription from RNA polymerase II promoter	Group	264	264	10	3	KLF9,MNX1,LITAF,ATF6,SMARCC2,SUPT3H,ATF5,TBL1X,CREG1,TCEA1	0.0548723	biological_process	461
mitochondrion organization	Group	41	41	3	7	ATP7A,LONP1,MAN2A1	0.0552746	biological_process	462
glycolysis	Group	68	68	4	5	DHTKD1,PKLR,ALDOC,ENO3	0.0556566	biological_process	463
cellular defense response	Group	69	69	4	5	ITGB1,B2M,LSP1,KLRC3	0.0581391	biological_process	464
regulation of cyclin-dependent protein kinase activity	Group	42	42	3	7	CDC25C,CCNG1,CDKN1C	0.0586282	biological_process	465
negative regulation of protein kinase activity	Group	42	42	3	7	PRKCA,PTPRC,NF1	0.0586282	biological_process	466
BMP signaling pathway	Group	42	42	3	7	BMPR2,TGFBR3,ACVR2B	0.0586282	biological_process	467
protein processing	Group	42	42	3	7	PTCH1,ECE1,NCSTN	0.0586282	biological_process	468
response to lipopolysaccharide	Group	99	99	5	5	MAPK14,ADAM17,PROS1,COMT,ABCC5	0.0588343	biological_process	469
positive regulation of bone mineralization	Group	19	19	2	10	BMPR2,ACVR2B	0.0600635	biological_process	470
melanocyte differentiation	Group	19	19	2	10	BCL2,RAB27A	0.0600635	biological_process	471
ceramide metabolic process	Group	19	19	2	10	CLN8,ASAH1	0.0600635	biological_process	472
angiogenesis involved in wound healing	Group	3	3	1	33	B4GALT1	0.0620169	biological_process	473
macrophage fusion	Group	3	3	1	33	CD44	0.0620169	biological_process	474
regulation of synaptic growth at neuromuscular junction	Group	3	3	1	33	AGRN	0.0620169	biological_process	475
negative regulation of calcium ion transport into cytosol	Group	3	3	1	33	BCL2	0.0620169	biological_process	476
negative regulation of isotype switching to IgE isotypes	Group	3	3	1	33	BCL6	0.0620169	biological_process	477
negative regulation of T-helper 2 cell differentiation	Group	3	3	1	33	BCL6	0.0620169	biological_process	478
negative regulation of macroautophagy	Group	3	3	1	33	NPC1	0.0620169	biological_process	479
negative regulation of Rac protein signal transduction	Group	3	3	1	33	NF1	0.0620169	biological_process	480
negative regulation of B cell apoptosis	Group	3	3	1	33	BCL6	0.0620169	biological_process	481
negative regulation of interleukin-2 production	Group	3	3	1	33	IL20RB	0.0620169	biological_process	482
negative regulation of transcription factor import into nucleus	Group	3	3	1	33	NF1	0.0620169	biological_process	483
negative regulation of cholesterol transport	Group	3	3	1	33	APOC1	0.0620169	biological_process	484
negative regulation of retroviral genome replication	Group	3	3	1	33	APOBEC3G	0.0620169	biological_process	485
positive regulation of cell killing	Group	3	3	1	33	MGEA5	0.0620169	biological_process	486
positive regulation of mitochondrial depolarization	Group	3	3	1	33	MGEA5	0.0620169	biological_process	487
positive regulation of T-helper 1 cell differentiation	Group	3	3	1	33	CD80	0.0620169	biological_process	488
positive regulation of antigen receptor-mediated signaling pathway	Group	3	3	1	33	PTPRC	0.0620169	biological_process	489
positive regulation of cyclin-dependent protein kinase activity during G1-S	Group	3	3	1	33	ADAM17	0.0620169	biological_process	490
positive regulation of keratinocyte migration	Group	3	3	1	33	ADAM9	0.0620169	biological_process	491
positive regulation of protein complex disassembly	Group	3	3	1	33	MGEA5	0.0620169	biological_process	492
positive regulation of cholesterol esterification	Group	3	3	1	33	APOC1	0.0620169	biological_process	493
rhythmic excitation	Group	3	3	1	33	SCN9A	0.0620169	biological_process	494
regulation of blood vessel endothelial cell migration	Group	3	3	1	33	NF1	0.0620169	biological_process	495
regulation of RNA export from nucleus	Group	3	3	1	33	NUDT4	0.0620169	biological_process	496
regulation of mitotic recombination	Group	3	3	1	33	MRE11A	0.0620169	biological_process	497
positive regulation of glucokinase activity	Group	3	3	1	33	PFKFB2	0.0620169	biological_process	498
regulation of germinal center formation	Group	3	3	1	33	BCL6	0.0620169	biological_process	499
regulation of humoral immune response mediated by circulating immunoglobulin	Group	3	3	1	33	PTPRC	0.0620169	biological_process	500
positive regulation of defense response to virus by host	Group	3	3	1	33	APOBEC3G	0.0620169	biological_process	501
regulation of low-density lipoprotein receptor catabolic process	Group	3	3	1	33	PCSK9	0.0620169	biological_process	502
regulation of nitrogen utilization	Group	3	3	1	33	BCL2	0.0620169	biological_process	503
regulation of vascular smooth muscle contraction	Group	3	3	1	33	P2RX1	0.0620169	biological_process	504
negative regulation of ATPase activity	Group	3	3	1	33	TNNI3	0.0620169	biological_process	505
positive regulation of metalloenzyme activity	Group	3	3	1	33	ATP7A	0.0620169	biological_process	506
cerebral cortex tangential migration	Group	3	3	1	33	RELN	0.0620169	biological_process	507
cardiac epithelial to mesenchymal transition	Group	3	3	1	33	TGFBR3	0.0620169	biological_process	508
clustering of voltage-gated sodium channels	Group	3	3	1	33	AGRN	0.0620169	biological_process	509
mitochondrial protein processing during import	Group	3	3	1	33	IMMP2L	0.0620169	biological_process	510
pyramidal neuron development	Group	3	3	1	33	ATP7A	0.0620169	biological_process	511
pigment granule transport	Group	3	3	1	33	RAB27A	0.0620169	biological_process	512
vesicle targeting, to, from or within Golgi	Group	3	3	1	33	TMED10	0.0620169	biological_process	513
retrograde transport, vesicle recycling within Golgi	Group	3	3	1	33	CUX1	0.0620169	biological_process	514
alanyl-tRNA aminoacylation	Group	3	3	1	33	AARS	0.0620169	biological_process	515
thymine catabolic process	Group	3	3	1	33	ALDH6A1	0.0620169	biological_process	516
transcription, RNA-dependent	Group	3	3	1	33	APOBEC3G	0.0620169	biological_process	517
elastin biosynthetic process	Group	3	3	1	33	ATP7A	0.0620169	biological_process	518
pyruvate biosynthetic process	Group	3	3	1	33	PKLR	0.0620169	biological_process	519
GTP catabolic process	Group	3	3	1	33	RHOQ	0.0620169	biological_process	520
vitamin K metabolic process	Group	3	3	1	33	VKORC1	0.0620169	biological_process	521
dATP metabolic process	Group	3	3	1	33	MGEA5	0.0620169	biological_process	522
head morphogenesis	Group	3	3	1	33	FLVCR1	0.0620169	biological_process	523
glossopharyngeal nerve morphogenesis	Group	3	3	1	33	HOXB3	0.0620169	biological_process	524
spinal cord patterning	Group	3	3	1	33	RELN	0.0620169	biological_process	525
L-cystine transport	Group	3	3	1	33	SLC1A4	0.0620169	biological_process	526
energy coupled proton transport, against electrochemical gradient	Group	3	3	1	33	ATP1A1	0.0620169	biological_process	527
aminophospholipid transport	Group	3	3	1	33	ATP11B	0.0620169	biological_process	528
antigen processing and presentation of exogenous protein antigen via MHC class Ib, TAP-dependent	Group	3	3	1	33	B2M	0.0620169	biological_process	529
oligosaccharide catabolic process	Group	3	3	1	33	HEXB	0.0620169	biological_process	530
low-density lipoprotein receptor metabolic process	Group	3	3	1	33	PCSK9	0.0620169	biological_process	531
detoxification of copper ion	Group	3	3	1	33	ATP7A	0.0620169	biological_process	532
healing during inflammatory response	Group	3	3	1	33	CD44	0.0620169	biological_process	533
negative regulation of cell migration	Group	43	43	3	6	MIA3,BCL2,NF1	0.0620753	biological_process	534
acute-phase response	Group	43	43	3	6	APOL2,FN1,TF	0.0620753	biological_process	535
ossification	Group	101	101	5	4	FN1,BCL2,SORT1,SLC26A2,EXT2	0.0630232	biological_process	536
sensory perception of sound	Group	166	166	7	4	HEXA,FGFR3,HEXB,GPR98,THRB,ITM2B,TBL1X	0.0630475	biological_process	537
regulation of growth	Group	71	71	4	5	GAS6,CD53,CREG1,IGSF11	0.0632785	biological_process	538
Wnt receptor signaling pathway	Group	134	134	6	4	FZD5,LRP6,TLE2,CSNK2A2,FZD3,CELSR2	0.0651695	biological_process	539
learning or memory	Group	44	44	3	6	PRKCA,AMFR,TMOD2	0.0656145	biological_process	540
positive regulation of insulin secretion	Group	20	20	2	10	MGEA5,PFKFB2	0.0658295	biological_process	541
inactivation of MAPK activity	Group	20	20	2	10	PRKCA,SPRED1	0.0658295	biological_process	542
regulation of calcium ion transport	Group	20	20	2	10	BCL2,P2RX1	0.0658295	biological_process	543
regulation of action potential in neuron	Group	20	20	2	10	P2RX1,SCN9A	0.0658295	biological_process	544
regulation of catalytic activity	Group	20	20	2	10	BCL2,CTSB	0.0658295	biological_process	545
transmembrane transport	Group	20	20	2	10	SLC2A14,SLC2A1	0.0658295	biological_process	546
neuron apoptosis	Group	20	20	2	10	BCL2,BNIP3	0.0658295	biological_process	547
DNA fragmentation involved in apoptosis	Group	20	20	2	10	PPT1,BNIP3	0.0658295	biological_process	548
histone methylation	Group	20	20	2	10	PRDM9,EZH2	0.0658295	biological_process	549
protein targeting to membrane	Group	20	20	2	10	MGEA5,SEC63	0.0658295	biological_process	550
dopamine metabolic process	Group	20	20	2	10	COMT,ATP7A	0.0658295	biological_process	551
neural tube development	Group	20	20	2	10	NF1,PHGDH	0.0658295	biological_process	552
hair follicle morphogenesis	Group	20	20	2	10	BCL2,ATP7A	0.0658295	biological_process	553
cholesterol efflux	Group	20	20	2	10	APOC1,NPC1	0.0658295	biological_process	554
innate immune response	Group	135	135	6	4	CD55,CFH,CD46,APOBEC3G,APOL1,C1RL	0.0670484	biological_process	555
actin cytoskeleton organization	Group	169	169	7	4	RHOQ,NF1,BCL6,EPB41,CNN1,FLNB,SSH1	0.0679973	biological_process	556
protein amino acid phosphorylation	Group	739	739	22	2	CDC2L6,ERBB3,MAPK14,PRKCA,DDR1,IGF1R,NTRK1,ADAM10,BMPR2,FGFR3,ACVR1B,MAP2K5,DAPK1,AXL,FER,TLE2,AAK1,ADRBK2,ACVR2B,NEK3,CSNK2A2,PXK	0.0685787	biological_process	557
actin filament organization	Group	45	45	3	6	FAT,BCL2,TMOD2	0.0692442	biological_process	558
peptidyl-tyrosine phosphorylation	Group	45	45	3	6	DDR1,FER,RELN	0.0692442	biological_process	559
transforming growth factor beta receptor signaling pathway	Group	74	74	4	5	ADAM9,LTBP1,TGFBR3,KLF10	0.0714186	biological_process	560
focal adhesion formation	Group	21	21	2	9	BCL2,SORBS1	0.0717711	biological_process	561
positive regulation of inflammatory response	Group	21	21	2	9	TGM2,PRKCA	0.0717711	biological_process	562
regulation of vasoconstriction	Group	21	21	2	9	P2RX1,ECE1	0.0717711	biological_process	563
homeostasis of number of cells within a tissue	Group	21	21	2	9	BCL2,IL20RB	0.0717711	biological_process	564
catecholamine metabolic process	Group	21	21	2	9	COMT,ATP7A	0.0717711	biological_process	565
ATP catabolic process	Group	21	21	2	9	ATP1A1,LONP1	0.0717711	biological_process	566
axon guidance	Group	106	106	5	4	SEMA3A,RELN,ROBO1,ROBO2,FEZ1	0.0742099	biological_process	567
T cell activation	Group	47	47	3	6	CD80,CD3D,DDOST	0.0767687	biological_process	568
T cell differentiation in the thymus	Group	22	22	2	9	ADAM17,BCL2	0.0778784	biological_process	569
synaptic transmission, glutamatergic	Group	22	22	2	9	P2RX1,SLC1A4	0.0778784	biological_process	570
camera-type eye morphogenesis	Group	22	22	2	9	VEGFA,NF1	0.0778784	biological_process	571
antigen processing and presentation of peptide antigen via MHC class I	Group	22	22	2	9	B2M,MR1	0.0778784	biological_process	572
response to bacterium	Group	22	22	2	9	ADAM17,ERAP1	0.0778784	biological_process	573
myelination	Group	48	48	3	6	HEXA,HEXB,SBF2	0.08066	biological_process	574
odontogenesis of dentine-containing tooth	Group	48	48	3	6	BSG,LAMA5,ACVR2B	0.08066	biological_process	575
ovarian follicle development	Group	48	48	3	6	ERMP1,VEGFA,BCL2	0.08066	biological_process	576
muscle thick filament assembly	Group	4	4	1	25	TMOD1	0.0818239	biological_process	577
transforming growth factor beta receptor complex assembly	Group	4	4	1	25	TGFBR3	0.0818239	biological_process	578
protein heterotetramerization	Group	4	4	1	25	ALDOC	0.0818239	biological_process	579
heterotypic cell-cell adhesion	Group	4	4	1	25	PTPRC	0.0818239	biological_process	580
negative regulation of anti-apoptosis	Group	4	4	1	25	RTN4	0.0818239	biological_process	581
negative regulation of T cell mediated cytotoxicity	Group	4	4	1	25	PTPRC	0.0818239	biological_process	582
negative regulation of cytolysis	Group	4	4	1	25	CD59	0.0818239	biological_process	583
negative regulation of axon extension involved in axon guidance	Group	4	4	1	25	SEMA3A	0.0818239	biological_process	584
negative regulation of T-helper 2 type immune response	Group	4	4	1	25	BCL6	0.0818239	biological_process	585
negative regulation of low-density lipoprotein receptor biosynthetic process	Group	4	4	1	25	ITGAV	0.0818239	biological_process	586
negative regulation of vasoconstriction	Group	4	4	1	25	BMPR2	0.0818239	biological_process	587
positive regulation of melanocyte differentiation	Group	4	4	1	25	BCL2	0.0818239	biological_process	588
positive regulation of granulocyte macrophage colony-stimulating factor biosynthetic process	Group	4	4	1	25	CD80	0.0818239	biological_process	589
positive regulation of pigmentation during development	Group	4	4	1	25	BCL2	0.0818239	biological_process	590
positive regulation of coagulation	Group	4	4	1	25	VKORC1	0.0818239	biological_process	591
positive regulation of interleukin-4 production	Group	4	4	1	25	IL20RB	0.0818239	biological_process	592
positive regulation of transforming growth factor-beta1 production	Group	4	4	1	25	ATP6AP2	0.0818239	biological_process	593
regulation of TOR signaling pathway	Group	4	4	1	25	SLC7A1	0.0818239	biological_process	594
negative regulation of JUN kinase activity	Group	4	4	1	25	PDCD4	0.0818239	biological_process	595
regulation of timing of neuron differentiation	Group	4	4	1	25	SOX5	0.0818239	biological_process	596
regulation of nitric oxide biosynthetic process	Group	4	4	1	25	ARG2	0.0818239	biological_process	597
leukemia inhibitory factor signaling pathway	Group	4	4	1	25	LIFR	0.0818239	biological_process	598
common-partner SMAD protein phosphorylation	Group	4	4	1	25	SPTBN1	0.0818239	biological_process	599
progesterone receptor signaling pathway	Group	4	4	1	25	KLF9	0.0818239	biological_process	600
cyclic-nucleotide-mediated signaling	Group	4	4	1	25	NUDT4	0.0818239	biological_process	601
lymphocyte homeostasis	Group	4	4	1	25	BCL2	0.0818239	biological_process	602
negative regulation of protein binding	Group	4	4	1	25	LRPAP1	0.0818239	biological_process	603
negative regulation of nitric-oxide synthase activity	Group	4	4	1	25	ARG2	0.0818239	biological_process	604
regulation of protein heterodimerization activity	Group	4	4	1	25	BCL2	0.0818239	biological_process	605
pre-B cell differentiation	Group	4	4	1	25	FOXP1	0.0818239	biological_process	606
axon regeneration in the peripheral nervous system	Group	4	4	1	25	MAP1B	0.0818239	biological_process	607
extracellular matrix disassembly	Group	4	4	1	25	LAMC1	0.0818239	biological_process	608
phospholipid translocation	Group	4	4	1	25	KCNN4	0.0818239	biological_process	609
membrane raft organization	Group	4	4	1	25	PPT1	0.0818239	biological_process	610
vacuole organization	Group	4	4	1	25	MAN2A1	0.0818239	biological_process	611
pigment granule organization	Group	4	4	1	25	BCL2	0.0818239	biological_process	612
mesenchymal cell development	Group	4	4	1	25	BCL2	0.0818239	biological_process	613
glial cell development	Group	4	4	1	25	PHGDH	0.0818239	biological_process	614
pigment granule localization	Group	4	4	1	25	RAB27A	0.0818239	biological_process	615
melanosome localization	Group	4	4	1	25	RAB27A	0.0818239	biological_process	616
norepinephrine biosynthetic process	Group	4	4	1	25	ATP7A	0.0818239	biological_process	617
dopamine catabolic process	Group	4	4	1	25	COMT	0.0818239	biological_process	618
glutamine biosynthetic process	Group	4	4	1	25	CORO2A	0.0818239	biological_process	619
ganglioside biosynthetic process	Group	4	4	1	25	ST6GALNAC1	0.0818239	biological_process	620
phosphatidic acid biosynthetic process	Group	4	4	1	25	PLD1	0.0818239	biological_process	621
unsaturated fatty acid biosynthetic process	Group	4	4	1	25	FADS1	0.0818239	biological_process	622
chondroitin sulfate metabolic process	Group	4	4	1	25	CHST11	0.0818239	biological_process	623
nuclear-transcribed mRNA poly(A) tail shortening	Group	4	4	1	25	PAN2	0.0818239	biological_process	624
linoleic acid metabolic process	Group	4	4	1	25	EPHX2	0.0818239	biological_process	625
de novo' posttranslational protein folding	Group	4	4	1	25	UGCGL1	0.0818239	biological_process	626
UDP-N-acetylgalactosamine metabolic process	Group	4	4	1	25	EXTL2	0.0818239	biological_process	627
response to endoplasmic reticulum stress	Group	4	4	1	25	FAM129A	0.0818239	biological_process	628
glomerulus development	Group	4	4	1	25	BCL2	0.0818239	biological_process	629
forebrain morphogenesis	Group	4	4	1	25	NF1	0.0818239	biological_process	630
establishment of tissue polarity	Group	4	4	1	25	FZD5	0.0818239	biological_process	631
morphogenesis of a polarized epithelium	Group	4	4	1	25	LAMA5	0.0818239	biological_process	632
blastocyst hatching	Group	4	4	1	25	GRN	0.0818239	biological_process	633
blood vessel maturation	Group	4	4	1	25	CD44	0.0818239	biological_process	634
immune system development	Group	4	4	1	25	BCL2	0.0818239	biological_process	635
development of secondary sexual characteristics	Group	4	4	1	25	B4GALT1	0.0818239	biological_process	636
choline transport	Group	4	4	1	25	SLC44A1	0.0818239	biological_process	637
arginine transport	Group	4	4	1	25	SLC7A1	0.0818239	biological_process	638
L-alanine transport	Group	4	4	1	25	SLC1A4	0.0818239	biological_process	639
proline transport	Group	4	4	1	25	SLC1A4	0.0818239	biological_process	640
potassium ion import	Group	4	4	1	25	ATP1A1	0.0818239	biological_process	641
ammonium transport	Group	4	4	1	25	RHAG	0.0818239	biological_process	642
plasma membrane long-chain fatty acid transport	Group	4	4	1	25	CD36	0.0818239	biological_process	643
melanin metabolic process	Group	4	4	1	25	BCL2	0.0818239	biological_process	644
voluntary musculoskeletal movement	Group	4	4	1	25	ITPR1	0.0818239	biological_process	645
response to prostaglandin E stimulus	Group	4	4	1	25	TGFBR3	0.0818239	biological_process	646
response to insecticide	Group	4	4	1	25	MAP1B	0.0818239	biological_process	647
response to sterol depletion	Group	4	4	1	25	INSIG1	0.0818239	biological_process	648
protein homooligomerization	Group	78	78	4	5	TGM2,SYT1,P2RX1,LONP1	0.0830583	biological_process	649
regulation of gene expression	Group	78	78	4	5	BCL2,SORT1,ATP7A,PHGDH	0.0830583	biological_process	650
fatty acid metabolic process	Group	110	110	5	4	CD36,ACSL1,ACSL3,PNPLA8,ACSM3	0.083885	biological_process	651
positive regulation of B cell proliferation	Group	23	23	2	8	PTPRC,BCL6	0.0841418	biological_process	652
activation of pro-apoptotic gene products	Group	23	23	2	8	BCL2,TNFRSF10B	0.0841418	biological_process	653
nuclear-transcribed mRNA catabolic process, nonsense-mediated decay	Group	23	23	2	8	DCP2,PAN2	0.0841418	biological_process	654
response to gamma radiation	Group	23	23	2	8	BCL2,PTPRC	0.0841418	biological_process	655
response to zinc ion	Group	23	23	2	8	ATP7A,GGH	0.0841418	biological_process	656
response to nicotine	Group	23	23	2	8	BCL2,LEPR	0.0841418	biological_process	657
regulation of translation	Group	80	80	4	5	MIF4GD,EIF4EBP2,FAM129A,EIF4E3	0.0892058	biological_process	658
protein modification process	Group	217	217	8	3	PCMTD2,PCMTD1,PPT1,PAM,ERO1L,MANBA,RPN2,PLOD1	0.0904461	biological_process	659
positive regulation of mesenchymal cell proliferation	Group	24	24	2	8	VEGFA,FOXP1	0.090552	biological_process	660
protein import into nucleus, translocation	Group	24	24	2	8	CEP57,BCL6	0.090552	biological_process	661
tricarboxylic acid cycle	Group	24	24	2	8	IDH1,IDH2	0.090552	biological_process	662
peptide cross-linking	Group	24	24	2	8	FN1,TGM2	0.090552	biological_process	663
limb morphogenesis	Group	24	24	2	8	FLVCR1,ASPH	0.090552	biological_process	664
associative learning	Group	24	24	2	8	PPT1,CLN8	0.090552	biological_process	665
lipid catabolic process	Group	113	113	5	4	DDHD2,PLD1,PPT1,PLCB1,PNPLA8	0.0915564	biological_process	666
calcium ion transport	Group	149	149	6	4	ATP2A2,NFATC1,ATP2A3,ATP2B1,ITPR1,ATP2C1	0.096611	biological_process	667
neuroprotection	Group	25	25	2	8	ADAM9,ATP7A	0.0971	biological_process	668
platelet-derived growth factor receptor signaling pathway	Group	25	25	2	8	VEGFA,TXNIP	0.0971	biological_process	669
regulation of protein localization	Group	25	25	2	8	BCL2,RABGAP1L	0.0971	biological_process	670
epithelial to mesenchymal transition	Group	25	25	2	8	S100A4,NFATC1	0.0971	biological_process	671
neurogenesis	Group	25	25	2	8	PCSK9,PHGDH	0.0971	biological_process	672
ureteric bud development	Group	25	25	2	8	BCL2,ROBO2	0.0971	biological_process	673
ventricular cardiac muscle morphogenesis	Group	25	25	2	8	TNNI3,TGFBR3	0.0971	biological_process	674
protein maturation by peptide bond cleavage	Group	25	25	2	8	ECE1,PCSK9	0.0971	biological_process	675
elastic fiber assembly	Group	5	5	1	20	ATP7A	0.101213	biological_process	676
positive regulation of cell adhesion mediated by integrin	Group	5	5	1	20	ADAM9	0.101213	biological_process	677
desensitization of G-protein coupled receptor protein signaling pathway	Group	5	5	1	20	ADRBK2	0.101213	biological_process	678
negative regulation of myeloid cell apoptosis	Group	5	5	1	20	BCL2	0.101213	biological_process	679
negative regulation of fatty acid biosynthetic process	Group	5	5	1	20	APOC1	0.101213	biological_process	680
negative regulation of lipoprotein metabolic process	Group	5	5	1	20	ITGAV	0.101213	biological_process	681
negative regulation of protein amino acid autophosphorylation	Group	5	5	1	20	PTPRC	0.101213	biological_process	682
negative regulation of striated muscle contraction	Group	5	5	1	20	ARG2	0.101213	biological_process	683
positive regulation of epidermal growth factor receptor activity	Group	5	5	1	20	ADAM17	0.101213	biological_process	684
positive regulation of telomere maintenance via telomerase	Group	5	5	1	20	TNKS	0.101213	biological_process	685
positive regulation of lipid biosynthetic process	Group	5	5	1	20	SORBS1	0.101213	biological_process	686
regulation of Rho GTPase activity	Group	5	5	1	20	BCL6	0.101213	biological_process	687
regulation of receptor-mediated endocytosis	Group	5	5	1	20	PRKCA	0.101213	biological_process	688
regulation of glucose import	Group	5	5	1	20	APPL1	0.101213	biological_process	689
regulation of potassium ion transport	Group	5	5	1	20	KCNE3	0.101213	biological_process	690
sequestering of calcium ion	Group	5	5	1	20	HSP90B1	0.101213	biological_process	691
lysosomal lumen acidification	Group	5	5	1	20	PPT1	0.101213	biological_process	692
myelination in the peripheral nervous system	Group	5	5	1	20	NF1	0.101213	biological_process	693
negative regulation of systemic arterial blood pressure	Group	5	5	1	20	BMPR2	0.101213	biological_process	694
regulation of systemic arterial blood pressure by endothelin	Group	5	5	1	20	ECE1	0.101213	biological_process	695
killing of cells of another organism	Group	5	5	1	20	APOL1	0.101213	biological_process	696
B cell lineage commitment	Group	5	5	1	20	BCL2	0.101213	biological_process	697
cellular response to nutrient levels	Group	5	5	1	20	LEPR	0.101213	biological_process	698
apoptosis in response to endoplasmic reticulum stress	Group	5	5	1	20	BCL2	0.101213	biological_process	699
high-density lipoprotein particle remodeling	Group	5	5	1	20	APOC1	0.101213	biological_process	700
Schwann cell development	Group	5	5	1	20	NF1	0.101213	biological_process	701
cardioblast differentiation	Group	5	5	1	20	ITGB1	0.101213	biological_process	702
protein localization to telomere	Group	5	5	1	20	TNKS	0.101213	biological_process	703
fructose 2,6-bisphosphate metabolic process	Group	5	5	1	20	PFKFB2	0.101213	biological_process	704
gamma-aminobutyric acid metabolic process	Group	5	5	1	20	PHGDH	0.101213	biological_process	705
tryptophan metabolic process	Group	5	5	1	20	ATP7A	0.101213	biological_process	706
peptidyl-histidine phosphorylation	Group	5	5	1	20	PDK1	0.101213	biological_process	707
immunoglobulin V(D)J recombination	Group	5	5	1	20	FOXP1	0.101213	biological_process	708
quinolinate metabolic process	Group	5	5	1	20	QPRT	0.101213	biological_process	709
gland morphogenesis	Group	5	5	1	20	BCL2	0.101213	biological_process	710
embryonic viscerocranium morphogenesis	Group	5	5	1	20	CHST11	0.101213	biological_process	711
embryonic foregut morphogenesis	Group	5	5	1	20	ACVR2B	0.101213	biological_process	712
basic amino acid transport	Group	5	5	1	20	SLC7A1	0.101213	biological_process	713
carnitine transport	Group	5	5	1	20	SLC22A4	0.101213	biological_process	714
neutrophil mediated immunity	Group	5	5	1	20	ADAM17	0.101213	biological_process	715
response to muramyl dipeptide	Group	5	5	1	20	MAPK14	0.101213	biological_process	716
photoperiodism	Group	5	5	1	20	NMU	0.101213	biological_process	717
response to manganese ion	Group	5	5	1	20	ADAM9	0.101213	biological_process	718
vesicle-mediated transport	Group	223	223	8	3	LRPAP1,RAB27A,LMAN1,SYTL1,RTN3,CLTCL1,TMED10,TRAPPC6A	0.101657	biological_process	719
mesoderm formation	Group	26	26	2	7	BMPR2,EXT2	0.103777	biological_process	720
negative regulation of transcription factor activity	Group	26	26	2	7	ID2,EGLN1	0.103777	biological_process	721
embryonic skeletal system morphogenesis	Group	54	54	3	5	HSPG2,HOXB3,CHST11	0.105702	biological_process	722
positive regulation of protein kinase activity	Group	27	27	2	7	PTPRC,RELN	0.110575	biological_process	723
pancreas development	Group	27	27	2	7	MNX1,ACVR2B	0.110575	biological_process	724
protein complex assembly	Group	121	121	5	4	TGFBR3,PICALM,CD3D,KIFAP3,LAMC1	0.113693	biological_process	725
positive regulation of neuron apoptosis	Group	28	28	2	7	PCSK9,NF1	0.117486	biological_process	726
adult walking behavior	Group	28	28	2	7	HEXA,CLN8	0.117486	biological_process	727
protein targeting	Group	57	57	3	5	AKAP12,RAB27A,SYNGR1	0.119228	biological_process	728
heart trabecula formation	Group	6	6	1	16	TGFBR3	0.120194	biological_process	729
nucleosome positioning	Group	6	6	1	16	HIST1H1C	0.120194	biological_process	730
negative regulation of viral reproduction	Group	6	6	1	16	APOBEC3G	0.120194	biological_process	731
negative regulation of cytokine-mediated signaling pathway	Group	6	6	1	16	PTPRC	0.120194	biological_process	732
negative regulation of Rho protein signal transduction	Group	6	6	1	16	BCL6	0.120194	biological_process	733
negative regulation of S phase of mitotic cell cycle	Group	6	6	1	16	BCL6	0.120194	biological_process	734
negative regulation of oligodendrocyte differentiation	Group	6	6	1	16	NF1	0.120194	biological_process	735
negative regulation of receptor-mediated endocytosis	Group	6	6	1	16	APOC1	0.120194	biological_process	736
positive regulation of gamma-delta T cell differentiation	Group	6	6	1	16	PTPRC	0.120194	biological_process	737
positive regulation of smooth muscle cell migration	Group	6	6	1	16	BCL2	0.120194	biological_process	738
positive regulation of T cell mediated immunity	Group	6	6	1	16	PTPRC	0.120194	biological_process	739
positive regulation of humoral immune response mediated by circulating immunoglobulin	Group	6	6	1	16	PTPRC	0.120194	biological_process	740
positive regulation of immunoglobulin production	Group	6	6	1	16	FOXP1	0.120194	biological_process	741
positive regulation of heart contraction	Group	6	6	1	16	ATP1A1	0.120194	biological_process	742
regulation of glial cell differentiation	Group	6	6	1	16	NF1	0.120194	biological_process	743
regulation of smooth muscle cell differentiation	Group	6	6	1	16	ENPP3	0.120194	biological_process	744
regulation of glycoprotein biosynthetic process	Group	6	6	1	16	BCL2	0.120194	biological_process	745
ER-nuclear signaling pathway	Group	6	6	1	16	ATP2A2	0.120194	biological_process	746
stress-activated MAPK cascade	Group	6	6	1	16	MAPK14	0.120194	biological_process	747
regulation of bone resorption	Group	6	6	1	16	NF1	0.120194	biological_process	748
saliva secretion	Group	6	6	1	16	KCNN4	0.120194	biological_process	749
blood coagulation, extrinsic pathway	Group	6	6	1	16	TFPI	0.120194	biological_process	750
positive regulation of cell size	Group	6	6	1	16	RB1CC1	0.120194	biological_process	751
estrogen biosynthetic process	Group	6	6	1	16	HSD17B8	0.120194	biological_process	752
negative regulation of transferase activity	Group	6	6	1	16	CLN8	0.120194	biological_process	753
negative regulation of telomerase activity	Group	6	6	1	16	PIF1	0.120194	biological_process	754
central nervous system neuron axonogenesis	Group	6	6	1	16	PRKCA	0.120194	biological_process	755
very-low-density lipoprotein particle clearance	Group	6	6	1	16	APOC1	0.120194	biological_process	756
lymphoid progenitor cell differentiation	Group	6	6	1	16	BCL2	0.120194	biological_process	757
Golgi to plasma membrane protein transport	Group	6	6	1	16	OPTN	0.120194	biological_process	758
lysosomal transport	Group	6	6	1	16	NPC1	0.120194	biological_process	759
glucose catabolic process	Group	6	6	1	16	PFKFB2	0.120194	biological_process	760
fructose 1,6-bisphosphate metabolic process	Group	6	6	1	16	ALDOC	0.120194	biological_process	761
norepinephrine metabolic process	Group	6	6	1	16	ATP7A	0.120194	biological_process	762
carnitine metabolic process	Group	6	6	1	16	SLC22A4	0.120194	biological_process	763
serine family amino acid biosynthetic process	Group	6	6	1	16	PHGDH	0.120194	biological_process	764
tyrosine metabolic process	Group	6	6	1	16	ATP7A	0.120194	biological_process	765
methionine metabolic process	Group	6	6	1	16	MTHFR	0.120194	biological_process	766
tetrahydrofolate metabolic process	Group	6	6	1	16	MTHFR	0.120194	biological_process	767
icosanoid biosynthetic process	Group	6	6	1	16	FADS1	0.120194	biological_process	768
long-chain fatty acid biosynthetic process	Group	6	6	1	16	FADS1	0.120194	biological_process	769
sphingolipid catabolic process	Group	6	6	1	16	PPT1	0.120194	biological_process	770
base conversion or substitution editing	Group	6	6	1	16	APOBEC3G	0.120194	biological_process	771
lipoprotein catabolic process	Group	6	6	1	16	CD36	0.120194	biological_process	772
lactate metabolic process	Group	6	6	1	16	PFKFB2	0.120194	biological_process	773
cellular response to oxidative stress	Group	6	6	1	16	LONP1	0.120194	biological_process	774
establishment of planar polarity	Group	6	6	1	16	FZD3	0.120194	biological_process	775
sympathetic nervous system development	Group	6	6	1	16	NF1	0.120194	biological_process	776
antigen processing and presentation of endogenous peptide antigen via MHC class I	Group	6	6	1	16	ERAP1	0.120194	biological_process	777
musculoskeletal movement	Group	6	6	1	16	CLN8	0.120194	biological_process	778
response to selenium ion	Group	6	6	1	16	SEPP1	0.120194	biological_process	779
keratinocyte differentiation	Group	58	58	3	5	PTGS1,ADAM9,TXNIP	0.123872	biological_process	780
response to cAMP	Group	58	58	3	5	BCL2,BSG,PKLR	0.123872	biological_process	781
negative regulation of translation	Group	29	29	2	6	PRKCA,EIF4EBP2	0.124502	biological_process	782
glutathione metabolic process	Group	29	29	2	6	IDH1,HAGH	0.124502	biological_process	783
inner ear development	Group	29	29	2	6	FGFR3,GPR98	0.124502	biological_process	784
anion transport	Group	29	29	2	6	SLCO1A2,SLC4A1	0.124502	biological_process	785
eating behavior	Group	29	29	2	6	LEPR,NMU	0.124502	biological_process	786
positive regulation of osteoblast differentiation	Group	30	30	2	6	BMPR2,ACVR2B	0.131615	biological_process	787
phospholipid transport	Group	30	30	2	6	ATP11B,ATP11A	0.131615	biological_process	788
response to antibiotic	Group	30	30	2	6	PRKCA,VKORC1	0.131615	biological_process	789
response to hydrogen peroxide	Group	61	61	3	4	BCL2,ADAM9,TXNIP	0.138185	biological_process	790
stress fiber formation	Group	7	7	1	14	SORBS1	0.138774	biological_process	791
clathrin coat assembly	Group	7	7	1	14	PICALM	0.138774	biological_process	792
positive regulation of synaptogenesis	Group	7	7	1	14	PRKCA	0.138774	biological_process	793
cell adhesion mediated by integrin	Group	7	7	1	14	ADAM17	0.138774	biological_process	794
neuron adhesion	Group	7	7	1	14	NCAM2	0.138774	biological_process	795
negative regulation of peptidyl-tyrosine phosphorylation	Group	7	7	1	14	PTPRC	0.138774	biological_process	796
negative regulation of coagulation	Group	7	7	1	14	PROS1	0.138774	biological_process	797
negative regulation of interferon-gamma production	Group	7	7	1	14	IL20RB	0.138774	biological_process	798
negative regulation of lipid transport	Group	7	7	1	14	ITGAV	0.138774	biological_process	799
positive regulation of isotype switching to IgG isotypes	Group	7	7	1	14	PTPRC	0.138774	biological_process	800
positive regulation of growth hormone secretion	Group	7	7	1	14	MGEA5	0.138774	biological_process	801
positive regulation of chemokine production	Group	7	7	1	14	ADAM17	0.138774	biological_process	802
positive regulation of ion transport	Group	7	7	1	14	P2RX1	0.138774	biological_process	803
positive regulation of Ras GTPase activity	Group	7	7	1	14	NF1	0.138774	biological_process	804
regulation of S phase	Group	7	7	1	14	PTPRC	0.138774	biological_process	805
traversing start control point of mitotic cell cycle	Group	7	7	1	14	CDC25C	0.138774	biological_process	806
regulation of telomere maintenance	Group	7	7	1	14	PIF1	0.138774	biological_process	807
positive regulation of adenylate cyclase activity	Group	7	7	1	14	NF1	0.138774	biological_process	808
regulation of gene-specific transcription	Group	7	7	1	14	CELSR2	0.138774	biological_process	809
entrainment of circadian clock	Group	7	7	1	14	BHLHB2	0.138774	biological_process	810
regulation of viral genome replication	Group	7	7	1	14	BCL2	0.138774	biological_process	811
enucleate erythrocyte differentiation	Group	7	7	1	14	ID2	0.138774	biological_process	812
protein retention in ER lumen	Group	7	7	1	14	PDIA3	0.138774	biological_process	813
cytoskeletal anchoring at plasma membrane	Group	7	7	1	14	FLNB	0.138774	biological_process	814
T-helper cell differentiation	Group	7	7	1	14	ATP7A	0.138774	biological_process	815
natural killer cell differentiation	Group	7	7	1	14	IL11RA	0.138774	biological_process	816
cell motility	Group	7	7	1	14	ADAM17	0.138774	biological_process	817
lipoprotein particle clearance	Group	7	7	1	14	CD36	0.138774	biological_process	818
pinocytosis	Group	7	7	1	14	PPT1	0.138774	biological_process	819
Schwann cell differentiation	Group	7	7	1	14	ERBB3	0.138774	biological_process	820
white fat cell differentiation	Group	7	7	1	14	SCD	0.138774	biological_process	821
cotranslational protein targeting to membrane	Group	7	7	1	14	SSR1	0.138774	biological_process	822
serotonin metabolic process	Group	7	7	1	14	ATP7A	0.138774	biological_process	823
tRNA aminoacylation	Group	7	7	1	14	AARS	0.138774	biological_process	824
glycine biosynthetic process	Group	7	7	1	14	SHMT2	0.138774	biological_process	825
valine metabolic process	Group	7	7	1	14	ALDH6A1	0.138774	biological_process	826
arginine metabolic process	Group	7	7	1	14	ARG2	0.138774	biological_process	827
lipopolysaccharide biosynthetic process	Group	7	7	1	14	GLT25D2	0.138774	biological_process	828
peptidyl-lysine modification	Group	7	7	1	14	ATP7A	0.138774	biological_process	829
coenzyme A metabolic process	Group	7	7	1	14	HMGCR	0.138774	biological_process	830
tetrapyrrole biosynthetic process	Group	7	7	1	14	ALAS2	0.138774	biological_process	831
UDP-N-acetylglucosamine metabolic process	Group	7	7	1	14	GFPT1	0.138774	biological_process	832
multidrug transport	Group	7	7	1	14	ABCC4	0.138774	biological_process	833
cerebellar Purkinje cell layer development	Group	7	7	1	14	AARS	0.138774	biological_process	834
nerve development	Group	7	7	1	14	MNX1	0.138774	biological_process	835
tail morphogenesis	Group	7	7	1	14	CHST11	0.138774	biological_process	836
cartilage development involved in endochondral bone morphogenesis	Group	7	7	1	14	HSPG2	0.138774	biological_process	837
mammary gland involution	Group	7	7	1	14	ERBB3	0.138774	biological_process	838
tongue development	Group	7	7	1	14	ERBB3	0.138774	biological_process	839
pharyngeal system development	Group	7	7	1	14	ECE1	0.138774	biological_process	840
cofactor transport	Group	7	7	1	14	PPT1	0.138774	biological_process	841
quaternary ammonium group transport	Group	7	7	1	14	SLC22A4	0.138774	biological_process	842
glucose import	Group	7	7	1	14	SORT1	0.138774	biological_process	843
transition metal ion transport	Group	7	7	1	14	SLC11A2	0.138774	biological_process	844
glycolipid transport	Group	7	7	1	14	PSAP	0.138774	biological_process	845
gastric acid secretion	Group	7	7	1	14	NMU	0.138774	biological_process	846
negative chemotaxis	Group	7	7	1	14	SEMA3A	0.138774	biological_process	847
insemination	Group	7	7	1	14	P2RX1	0.138774	biological_process	848
response to folic acid	Group	7	7	1	14	BCL2	0.138774	biological_process	849
leukocyte adhesion	Group	31	31	2	6	ITGB1,PTPRC	0.138818	biological_process	850
cholesterol transport	Group	31	31	2	6	CD36,NPC1	0.138818	biological_process	851
response to metal ion	Group	31	31	2	6	PKLR,NDRG1	0.138818	biological_process	852
response to glucocorticoid stimulus	Group	95	95	4	4	BCL2,ADAM9,PCK2,PAM	0.141687	biological_process	853
fibroblast growth factor receptor signaling pathway	Group	32	32	2	6	FGFR3,CEP57	0.146105	biological_process	854
generation of precursor metabolites and energy	Group	63	63	3	4	PHKB,LEPR,FECH	0.148023	biological_process	855
response to chemical stimulus	Group	64	64	3	4	BCL2,LEPR,LIFR	0.153026	biological_process	856
negative regulation of angiogenesis	Group	33	33	2	6	SERPINF1,NF1	0.153469	biological_process	857
regulation of cell adhesion	Group	33	33	2	6	SERPINI1,LAMA5	0.153469	biological_process	858
positive regulation of signal transduction	Group	33	33	2	6	CD80,VEGFA	0.153469	biological_process	859
amino acid biosynthetic process	Group	33	33	2	6	ASNS,PHGDH	0.153469	biological_process	860
gastrulation with mouth forming second	Group	33	33	2	6	LRP6,ACVR2B	0.153469	biological_process	861
visual learning	Group	33	33	2	6	HMGCR,NF1	0.153469	biological_process	862
positive regulation of cell-matrix adhesion	Group	8	8	1	12	CD36	0.156963	biological_process	863
negative regulation of bone resorption	Group	8	8	1	12	VEGFA	0.156963	biological_process	864
positive regulation of vascular endothelial growth factor receptor signaling pathway	Group	8	8	1	12	VEGFA	0.156963	biological_process	865
positive regulation of macrophage differentiation	Group	8	8	1	12	ID2	0.156963	biological_process	866
positive regulation of interleukin-10 production	Group	8	8	1	12	IL20RB	0.156963	biological_process	867
regulation of cell motion	Group	8	8	1	12	B4GALT1	0.156963	biological_process	868
regulation of epidermal growth factor receptor activity	Group	8	8	1	12	APLP2	0.156963	biological_process	869
regulation of synaptic transmission, GABAergic	Group	8	8	1	12	NF1	0.156963	biological_process	870
regulation of programmed cell death	Group	8	8	1	12	BCL2	0.156963	biological_process	871
pathway-restricted SMAD protein phosphorylation	Group	8	8	1	12	TGFBR3	0.156963	biological_process	872
cGMP-mediated signaling	Group	8	8	1	12	CD36	0.156963	biological_process	873
regulation of innate immune response	Group	8	8	1	12	ERAP1	0.156963	biological_process	874
calcium ion homeostasis	Group	8	8	1	12	CCDC47	0.156963	biological_process	875
iron ion homeostasis	Group	8	8	1	12	FECH	0.156963	biological_process	876
leukocyte homeostasis	Group	8	8	1	12	BCL2	0.156963	biological_process	877
hormone catabolic process	Group	8	8	1	12	ECE1	0.156963	biological_process	878
positive regulation of protein binding	Group	8	8	1	12	EPB41	0.156963	biological_process	879
positive regulation of oxidoreductase activity	Group	8	8	1	12	ATP7A	0.156963	biological_process	880
T cell lineage commitment	Group	8	8	1	12	BCL2	0.156963	biological_process	881
wound healing, spreading of epidermal cells	Group	8	8	1	12	ADAM17	0.156963	biological_process	882
oocyte development	Group	8	8	1	12	BCL2	0.156963	biological_process	883
myotube differentiation	Group	8	8	1	12	SORT1	0.156963	biological_process	884
spinal cord motor neuron differentiation	Group	8	8	1	12	CLN8	0.156963	biological_process	885
regulated secretory pathway	Group	8	8	1	12	TMED10	0.156963	biological_process	886
galactose metabolic process	Group	8	8	1	12	B4GALT1	0.156963	biological_process	887
fructose 6-phosphate metabolic process	Group	8	8	1	12	GFPT1	0.156963	biological_process	888
chondroitin sulfate biosynthetic process	Group	8	8	1	12	CHST11	0.156963	biological_process	889
heparan sulfate proteoglycan biosynthetic process	Group	8	8	1	12	EXT2	0.156963	biological_process	890
hemoglobin biosynthetic process	Group	8	8	1	12	ALAS2	0.156963	biological_process	891
RNA elongation	Group	8	8	1	12	TCEA1	0.156963	biological_process	892
nucleoside triphosphate catabolic process	Group	8	8	1	12	ENPP3	0.156963	biological_process	893
removal of superoxide radicals	Group	8	8	1	12	ATP7A	0.156963	biological_process	894
vitamin D metabolic process	Group	8	8	1	12	CYP2R1	0.156963	biological_process	895
salivary gland development	Group	8	8	1	12	LAMA5	0.156963	biological_process	896
cobalt ion transport	Group	8	8	1	12	SLC11A2	0.156963	biological_process	897
T-helper 2 type immune response	Group	8	8	1	12	BCL6	0.156963	biological_process	898
protein autoprocessing	Group	8	8	1	12	PCSK9	0.156963	biological_process	899
MAPKKK cascade	Group	65	65	3	4	FGFR3,MAP2K5,NF1	0.15808	biological_process	900
amino acid metabolic process	Group	65	65	3	4	MTHFR,ASNS,GCAT	0.15808	biological_process	901
lactation	Group	34	34	2	5	ATP7A,PAM	0.160902	biological_process	902
respiratory gaseous exchange	Group	34	34	2	5	MAN2A1,CHST11	0.160902	biological_process	903
protein amino acid autophosphorylation	Group	100	100	4	4	MAPK14,IGF1R,ACVR1B,FER	0.161396	biological_process	904
response to toxin	Group	66	66	3	4	BCL2,PRKCA,EPHX2	0.163186	biological_process	905
positive regulation of T cell proliferation	Group	35	35	2	5	CD59,PTPRC	0.1684	biological_process	906
phagocytosis	Group	35	35	2	5	ABCA7,ELMOD2	0.1684	biological_process	907
nucleocytoplasmic transport	Group	35	35	2	5	ADAM10,MLXIP	0.1684	biological_process	908
inflammatory response	Group	293	293	9	3	CD44,PRDX5,NFE2L1,F11R,EPHX2,HDAC9,SCN9A,ATRN,PXK	0.169419	biological_process	909
epidermis development	Group	102	102	4	3	PTCH1,ATP2A2,ATP2C1,PLOD1	0.169545	biological_process	910
myofibril assembly	Group	9	9	1	11	TMOD1	0.174768	biological_process	911
spindle assembly	Group	9	9	1	11	TNKS	0.174768	biological_process	912
cell-substrate junction assembly	Group	9	9	1	11	FN1	0.174768	biological_process	913
negative regulation of Ras protein signal transduction	Group	9	9	1	11	NF1	0.174768	biological_process	914
negative regulation of neuroblast proliferation	Group	9	9	1	11	NF1	0.174768	biological_process	915
negative regulation of translational initiation	Group	9	9	1	11	EIF4EBP2	0.174768	biological_process	916
positive regulation of chondrocyte differentiation	Group	9	9	1	11	THRB	0.174768	biological_process	917
positive regulation of osteoclast differentiation	Group	9	9	1	11	KLF10	0.174768	biological_process	918
positive regulation of blood vessel endothelial cell migration	Group	9	9	1	11	VEGFA	0.174768	biological_process	919
positive regulation of receptor-mediated endocytosis	Group	9	9	1	11	PPT1	0.174768	biological_process	920
positive regulation of glycogen biosynthetic process	Group	9	9	1	11	SORBS1	0.174768	biological_process	921
positive regulation of proteolysis	Group	9	9	1	11	MGEA5	0.174768	biological_process	922
positive regulation of peptidyl-serine phosphorylation	Group	9	9	1	11	BCL2	0.174768	biological_process	923
positive regulation of membrane protein ectodomain proteolysis	Group	9	9	1	11	ADAM9	0.174768	biological_process	924
positive regulation of DNA metabolic process	Group	9	9	1	11	MGEA5	0.174768	biological_process	925
regulation of B cell differentiation	Group	9	9	1	11	PTPRC	0.174768	biological_process	926
regulation of smoothened signaling pathway	Group	9	9	1	11	PTCH1	0.174768	biological_process	927
regulation of osteoblast differentiation	Group	9	9	1	11	HEMGN	0.174768	biological_process	928
mRNA stabilization	Group	9	9	1	11	VEGFA	0.174768	biological_process	929
activin receptor signaling pathway	Group	9	9	1	11	ACVR2B	0.174768	biological_process	930
regulation of synapse structure and activity	Group	9	9	1	11	PPT1	0.174768	biological_process	931
surfactant homeostasis	Group	9	9	1	11	VEGFA	0.174768	biological_process	932
regulation of cellular pH	Group	9	9	1	11	ATP1A1	0.174768	biological_process	933
erythrocyte maturation	Group	9	9	1	11	HBZ	0.174768	biological_process	934
androgen metabolic process	Group	9	9	1	11	HSD17B8	0.174768	biological_process	935
negative regulation of DNA binding	Group	9	9	1	11	TNKS	0.174768	biological_process	936
negative thymic T cell selection	Group	9	9	1	11	PTPRC	0.174768	biological_process	937
cardiac muscle cell proliferation	Group	9	9	1	11	TGFBR3	0.174768	biological_process	938
central nervous system neuron differentiation	Group	9	9	1	11	SOX5	0.174768	biological_process	939
cellular protein localization	Group	9	9	1	11	OPTN	0.174768	biological_process	940
endosome to lysosome transport	Group	9	9	1	11	SORT1	0.174768	biological_process	941
L-fucose catabolic process	Group	9	9	1	11	FUT1	0.174768	biological_process	942
fucose metabolic process	Group	9	9	1	11	FUCA1	0.174768	biological_process	943
methionine biosynthetic process	Group	9	9	1	11	MTHFR	0.174768	biological_process	944
aromatic compound catabolic process	Group	9	9	1	11	EPHX2	0.174768	biological_process	945
peptide biosynthetic process	Group	9	9	1	11	DMD	0.174768	biological_process	946
RNA-dependent DNA replication	Group	9	9	1	11	SERINC1	0.174768	biological_process	947
DNA catabolic process	Group	9	9	1	11	DNASE2	0.174768	biological_process	948
heme metabolic process	Group	9	9	1	11	FECH	0.174768	biological_process	949
oxaloacetate metabolic process	Group	9	9	1	11	PCK2	0.174768	biological_process	950
pyruvate metabolic process	Group	9	9	1	11	PFKFB2	0.174768	biological_process	951
cellular response to reactive oxygen species	Group	9	9	1	11	PRDX5	0.174768	biological_process	952
inflammatory response to antigenic stimulus	Group	9	9	1	11	IL20RB	0.174768	biological_process	953
protein maturation	Group	9	9	1	11	AGA	0.174768	biological_process	954
detection of calcium ion	Group	9	9	1	11	SYT1	0.174768	biological_process	955
glucose transport	Group	36	36	2	5	SLC2A1,SORBS1	0.175955	biological_process	956
protein oligomerization	Group	37	37	2	5	AMFR,QPRT	0.183563	biological_process	957
cell maturation	Group	37	37	2	5	VEGFA,FZD5	0.183563	biological_process	958
osteoblast differentiation	Group	37	37	2	5	NF1,WWOX	0.183563	biological_process	959
multicellular organism growth	Group	37	37	2	5	DHCR7,FLVCR1	0.183563	biological_process	960
cholesterol homeostasis	Group	38	38	2	5	NPC1,PCSK9	0.191217	biological_process	961
learning	Group	38	38	2	5	COMT,PLCB1	0.191217	biological_process	962
negative regulation of cell motion	Group	10	10	1	10	TGFBR3	0.192198	biological_process	963
negative regulation of G-protein coupled receptor protein signaling pathway	Group	10	10	1	10	ADRBK2	0.192198	biological_process	964
negative regulation of MAPKKK cascade	Group	10	10	1	10	NF1	0.192198	biological_process	965
negative regulation of foam cell differentiation	Group	10	10	1	10	ITGAV	0.192198	biological_process	966
SMAD protein nuclear translocation	Group	10	10	1	10	SPTBN1	0.192198	biological_process	967
regulation of pigmentation during development	Group	10	10	1	10	BCL2	0.192198	biological_process	968
transposition	Group	10	10	1	10	ERV3	0.192198	biological_process	969
M phase of mitotic cell cycle	Group	10	10	1	10	CDC25C	0.192198	biological_process	970
meiotic prophase I	Group	10	10	1	10	PRDM9	0.192198	biological_process	971
cell migration involved in gastrulation	Group	10	10	1	10	LRP6	0.192198	biological_process	972
plasma membrane organization	Group	10	10	1	10	AGRN	0.192198	biological_process	973
neurofilament cytoskeleton organization	Group	10	10	1	10	CLN8	0.192198	biological_process	974
epithelial cell development	Group	10	10	1	10	B4GALT1	0.192198	biological_process	975
chondrocyte development	Group	10	10	1	10	CHST11	0.192198	biological_process	976
mechanoreceptor differentiation	Group	10	10	1	10	NTRK1	0.192198	biological_process	977
melanosome transport	Group	10	10	1	10	RAB27A	0.192198	biological_process	978
cofactor metabolic process	Group	10	10	1	10	PPT1	0.192198	biological_process	979
fructose metabolic process	Group	10	10	1	10	PFKFB2	0.192198	biological_process	980
S-adenosylmethionine metabolic process	Group	10	10	1	10	COMT	0.192198	biological_process	981
glycogen catabolic process	Group	10	10	1	10	PYGL	0.192198	biological_process	982
amyloid precursor protein catabolic process	Group	10	10	1	10	NCSTN	0.192198	biological_process	983
urea cycle	Group	10	10	1	10	ARG2	0.192198	biological_process	984
bicarbonate transport	Group	10	10	1	10	SLC4A1	0.192198	biological_process	985
regulation of small GTPase mediated signal transduction	Group	73	73	3	4	IQGAP1,NF1,RGL2	0.200177	biological_process	986
skeletal system development	Group	147	147	5	3	HEXA,FGFR3,HEXB,ACVR2B,KLF10	0.200374	biological_process	987
chromatin modification	Group	186	186	6	3	PRDM9,BCOR,EZH2,HDAC9,TBL1XR1,SMARCC2	0.201276	biological_process	988
intracellular signaling cascade	Group	390	390	11	2	NUDT4,DDHD2,CD80,PRKCA,NFATC1,FER,SH2D2A,Kidins220,PLCB1,PDK1,CORO2A	0.204757	biological_process	989
positive regulation of NF-kappaB transcription factor activity	Group	40	40	2	5	TGFBR3,MTDH	0.206643	biological_process	990
neurotransmitter secretion	Group	40	40	2	5	SYT1,PPT1	0.206643	biological_process	991
cellular protein metabolic process	Group	40	40	2	5	HEXB,CLN8	0.206643	biological_process	992
anterior-posterior pattern formation	Group	111	111	4	3	BMPR2,HOXB3,LRP6,ACVR2B	0.207855	biological_process	993
negative regulation of neurogenesis	Group	11	11	1	9	ATF5	0.20926	biological_process	994
negative regulation of multicellular organism growth	Group	11	11	1	9	PTCH1	0.20926	biological_process	995
positive regulation of axon extension	Group	11	11	1	9	MAP1B	0.20926	biological_process	996
positive regulation of endocytosis	Group	11	11	1	9	MIB1	0.20926	biological_process	997
muscarinic acetylcholine receptor signaling pathway	Group	11	11	1	9	AGRN	0.20926	biological_process	998
regulation of embryonic development	Group	11	11	1	9	LAMA5	0.20926	biological_process	999
regulation of organ growth	Group	11	11	1	9	FLVCR1	0.20926	biological_process	1000
regulation of blood coagulation	Group	11	11	1	9	VKORC1	0.20926	biological_process	1001
establishment of cell polarity	Group	11	11	1	9	IGF1R	0.20926	biological_process	1002
microtubule bundle formation	Group	11	11	1	9	MAP1B	0.20926	biological_process	1003
prostaglandin metabolic process	Group	11	11	1	9	PTGS1	0.20926	biological_process	1004
mRNA metabolic process	Group	11	11	1	9	PCBP2	0.20926	biological_process	1005
tRNA modification	Group	11	11	1	9	AARS	0.20926	biological_process	1006
gut morphogenesis	Group	11	11	1	9	BCL2	0.20926	biological_process	1007
limb development	Group	11	11	1	9	PAM	0.20926	biological_process	1008
gonad development	Group	11	11	1	9	HMGCR	0.20926	biological_process	1009
establishment of protein localization	Group	11	11	1	9	PRKCA	0.20926	biological_process	1010
fatty acid transport	Group	11	11	1	9	CD36	0.20926	biological_process	1011
response to other organism	Group	11	11	1	9	PKLR	0.20926	biological_process	1012
suckling behavior	Group	11	11	1	9	APLP2	0.20926	biological_process	1013
renal system process	Group	11	11	1	9	BCL2	0.20926	biological_process	1014
detection of mechanical stimulus involved in sensory perception of sound	Group	11	11	1	9	GPR98	0.20926	biological_process	1015
response to UV-B	Group	11	11	1	9	BCL2	0.20926	biological_process	1016
neuropeptide signaling pathway	Group	112	112	4	3	NMU,SORT1,GPR98,CELSR2	0.212259	biological_process	1017
synaptogenesis	Group	41	41	2	4	MAP1B,AGRN	0.214406	biological_process	1018
striated muscle contraction	Group	41	41	2	4	ARG2,TNNI3	0.214406	biological_process	1019
intracellular protein transmembrane transport	Group	77	77	3	3	TNKS,NUP210,SIL1	0.222132	biological_process	1020
response to cytokine stimulus	Group	77	77	3	3	BCL2,LIFR,DDOST	0.222132	biological_process	1021
neuron development	Group	42	42	2	4	PPT1,MAP1B	0.222195	biological_process	1022
myoblast fusion	Group	12	12	1	8	CAST	0.225962	biological_process	1023
positive regulation of microtubule polymerization	Group	12	12	1	8	MAP1B	0.225962	biological_process	1024
regulation of cell-cell adhesion	Group	12	12	1	8	CELSR2	0.225962	biological_process	1025
negative regulation of ossification	Group	12	12	1	8	BCL2	0.225962	biological_process	1026
negative regulation of lipid catabolic process	Group	12	12	1	8	APOC1	0.225962	biological_process	1027
positive regulation of calcium ion transport into cytosol	Group	12	12	1	8	MGEA5	0.225962	biological_process	1028
T cell costimulation	Group	12	12	1	8	CD80	0.225962	biological_process	1029
positive regulation of protein ubiquitination	Group	12	12	1	8	FGFR3	0.225962	biological_process	1030
regulation of osteoclast differentiation	Group	12	12	1	8	ADAM10	0.225962	biological_process	1031
regulation of mitochondrial membrane potential	Group	12	12	1	8	BCL2	0.225962	biological_process	1032
neurotransmitter metabolic process	Group	12	12	1	8	AGTPBP1	0.225962	biological_process	1033
neurotransmitter catabolic process	Group	12	12	1	8	COMT	0.225962	biological_process	1034
actomyosin structure organization	Group	12	12	1	8	CNN1	0.225962	biological_process	1035
nerve-nerve synaptic transmission	Group	12	12	1	8	TMOD2	0.225962	biological_process	1036
inner ear receptor cell differentiation	Group	12	12	1	8	FGFR3	0.225962	biological_process	1037
post-Golgi vesicle-mediated transport	Group	12	12	1	8	SCAMP1	0.225962	biological_process	1038
polyamine metabolic process	Group	12	12	1	8	SAT1	0.225962	biological_process	1039
glutathione biosynthetic process	Group	12	12	1	8	GGT7	0.225962	biological_process	1040
glycoprotein metabolic process	Group	12	12	1	8	TXNDC4	0.225962	biological_process	1041
double-strand break repair via nonhomologous end joining	Group	12	12	1	8	MRE11A	0.225962	biological_process	1042
cyclic nucleotide metabolic process	Group	12	12	1	8	NUDT4	0.225962	biological_process	1043
developmental maturation	Group	12	12	1	8	MAP1B	0.225962	biological_process	1044
face morphogenesis	Group	12	12	1	8	ASPH	0.225962	biological_process	1045
cranial nerve development	Group	12	12	1	8	ERBB3	0.225962	biological_process	1046
adrenal gland development	Group	12	12	1	8	NF1	0.225962	biological_process	1047
ATP hydrolysis coupled proton transport	Group	12	12	1	8	ATP6V1E2	0.225962	biological_process	1048
long-chain fatty acid transport	Group	12	12	1	8	CD36	0.225962	biological_process	1049
mating behavior	Group	12	12	1	8	APLP2	0.225962	biological_process	1050
behavioral response to pain	Group	12	12	1	8	SCN9A	0.225962	biological_process	1051
grooming behavior	Group	12	12	1	8	PPT1	0.225962	biological_process	1052
response to temperature stimulus	Group	12	12	1	8	ERO1L	0.225962	biological_process	1053
response to lithium ion	Group	12	12	1	8	PKLR	0.225962	biological_process	1054
response to axon injury	Group	12	12	1	8	MAP1B	0.225962	biological_process	1055
intracellular protein transport	Group	235	235	7	2	SORT1,GLG1,ERP29,SYTL1,CLTCL1,TMED10,SYTL5	0.229989	biological_process	1056
growth	Group	43	43	2	4	BCL2,SEPP1	0.230005	biological_process	1057
protein polymerization	Group	43	43	2	4	TUBB2B,TUBA1A	0.230005	biological_process	1058
T cell differentiation	Group	43	43	2	4	BCL2,PTPRC	0.230005	biological_process	1059
cell differentiation	Group	658	658	17	2	RUFY3,SLC2A14,VEGFA,NTRK1,SEMA3A,ITGAV,FZD5,SORT1,SH2D2A,ROBO1,ROBO2,DHCR7,FLNB,S100A13,EXT2,HEMGN,SLCO4C1	0.230814	biological_process	1060
skeletal system morphogenesis	Group	44	44	2	4	WWOX,ACVR2B	0.237833	biological_process	1061
negative regulation of growth	Group	13	13	1	7	BBC3	0.242313	biological_process	1062
negative regulation of mitotic cell cycle	Group	13	13	1	7	BCL2	0.242313	biological_process	1063
negative regulation of striated muscle development	Group	13	13	1	7	HDAC9	0.242313	biological_process	1064
positive regulation of foam cell differentiation	Group	13	13	1	7	CD36	0.242313	biological_process	1065
positive regulation of calcium ion transport	Group	13	13	1	7	MGEA5	0.242313	biological_process	1066
regulation of protein stability	Group	13	13	1	7	BCL2	0.242313	biological_process	1067
regulation of cell size	Group	13	13	1	7	CLN8	0.242313	biological_process	1068
erythrocyte development	Group	13	13	1	7	BCL6	0.242313	biological_process	1069
thyroid hormone metabolic process	Group	13	13	1	7	RELN	0.242313	biological_process	1070
regulation of protein binding	Group	13	13	1	7	TGFBR3	0.242313	biological_process	1071
vesicle targeting	Group	13	13	1	7	TMED10	0.242313	biological_process	1072
mitochondrial membrane organization	Group	13	13	1	7	CLN8	0.242313	biological_process	1073
neuron maturation	Group	13	13	1	7	CDKN1C	0.242313	biological_process	1074
central nervous system neuron development	Group	13	13	1	7	ATP7A	0.242313	biological_process	1075
S-adenosylhomocysteine metabolic process	Group	13	13	1	7	COMT	0.242313	biological_process	1076
glycoprotein biosynthetic process	Group	13	13	1	7	B4GALT1	0.242313	biological_process	1077
cellular response to DNA damage stimulus	Group	13	13	1	7	MRE11A	0.242313	biological_process	1078
hindlimb morphogenesis	Group	13	13	1	7	ATP7A	0.242313	biological_process	1079
dorsal-ventral neural tube patterning	Group	13	13	1	7	MNX1	0.242313	biological_process	1080
L-amino acid transport	Group	13	13	1	7	SLC43A1	0.242313	biological_process	1081
monovalent inorganic cation transport	Group	13	13	1	7	ATP1A1	0.242313	biological_process	1082
dicarboxylic acid transport	Group	13	13	1	7	SLC1A4	0.242313	biological_process	1083
T-helper 1 type immune response	Group	13	13	1	7	VEGFA	0.242313	biological_process	1084
response to carbohydrate stimulus	Group	13	13	1	7	MAP1B	0.242313	biological_process	1085
response to caffeine	Group	13	13	1	7	BCL2	0.242313	biological_process	1086
negative regulation of cell differentiation	Group	45	45	2	4	ITGB1,BCL6	0.245675	biological_process	1087
phospholipid metabolic process	Group	45	45	2	4	PCSK9,CLN8	0.245675	biological_process	1088
negative regulation of transcription	Group	159	159	5	3	ID2,FOXP1,PDCD4,HDAC9,THRB	0.246261	biological_process	1089
cell cycle	Group	539	539	14	2	CDC25C,TXNIP,CCNG1,CDKN1C,WWOX,PDCD4,VWA5A,RB1CC1,CCPG1,NEK3,APPL1,PPP1CB,SEPT8,SEPT6	0.25181	biological_process	1090
regulation of heart contraction	Group	46	46	2	4	CUGBP2,THRB	0.253525	biological_process	1091
cell projection organization	Group	46	46	2	4	SPAG6,IFT20	0.253525	biological_process	1092
carbohydrate transport	Group	46	46	2	4	SLC2A14,SLC2A1	0.253525	biological_process	1093
adult locomotory behavior	Group	46	46	2	4	PPT1,CLN8	0.253525	biological_process	1094
sensory perception of pain	Group	46	46	2	4	EPHX2,NMU	0.253525	biological_process	1095
single fertilization	Group	46	46	2	4	CD46,HEXB	0.253525	biological_process	1096
kidney development	Group	83	83	3	3	BCL2,PCSK9,ACVR2B	0.255866	biological_process	1097
response to ethanol	Group	83	83	3	3	BCL2,PRKCA,GGH	0.255866	biological_process	1098
death	Group	14	14	1	7	P2RX1	0.258318	biological_process	1099
mRNA splice site selection	Group	14	14	1	7	CUGBP2	0.258318	biological_process	1100
positive regulation of phosphoinositide 3-kinase cascade	Group	14	14	1	7	ERBB3	0.258318	biological_process	1101
positive regulation of mitotic cell cycle	Group	14	14	1	7	ASNS	0.258318	biological_process	1102
positive regulation of interleukin-2 biosynthetic process	Group	14	14	1	7	CD80	0.258318	biological_process	1103
positive regulation of ossification	Group	14	14	1	7	THRB	0.258318	biological_process	1104
regulation of peptidyl-tyrosine phosphorylation	Group	14	14	1	7	PRKCA	0.258318	biological_process	1105
nerve growth factor receptor signaling pathway	Group	14	14	1	7	SORT1	0.258318	biological_process	1106
elevation of cytosolic calcium ion concentration during G-protein signaling, coupled to IP3 second messenger (phospholipase C activating)	Group	14	14	1	7	TGM2	0.258318	biological_process	1107
G1 phase of mitotic cell cycle	Group	14	14	1	7	CDKN1C	0.258318	biological_process	1108
keratinocyte proliferation	Group	14	14	1	7	PTCH1	0.258318	biological_process	1109
pyridine nucleotide biosynthetic process	Group	14	14	1	7	QPRT	0.258318	biological_process	1110
NAD biosynthetic process	Group	14	14	1	7	QPRT	0.258318	biological_process	1111
skeletal muscle regeneration	Group	14	14	1	7	ENO3	0.258318	biological_process	1112
thyroid gland development	Group	14	14	1	7	HOXB3	0.258318	biological_process	1113
lipoprotein transport	Group	14	14	1	7	CD36	0.258318	biological_process	1114
L-glutamate transport	Group	14	14	1	7	ARL6IP5	0.258318	biological_process	1115
positive regulation of peptidyl-tyrosine phosphorylation	Group	47	47	2	4	CD80,FGFR3	0.261381	biological_process	1116
transcription	Group	2246	2246	52	2	PNRC1,ZNF277,PHF3,PRDM9,BBX,HMBOX1,ZNF276,FRYL,ZNF429,HOXB3,TXNIP,NFATC1,KLF9,BCL6,FOXP1,BCOR,EZH2,SOX5,CUX1,MNX1,LITAF,ATF6,NCOA4,TLE2,ARID3B,BHLHB2,RB1CC1,CTCFL,RYBP,HDAC9,KLF10,THRB,GRHL1,TBL1XR1,SMARCC2,SUPT3H,RBAK,ZMIZ1,ATF5,NFIA,TBL1X,ZNF33B,CREB3L2,PARP14,IRF2BP2,MLXIP,ZBTB38,TCEA1,RRAGC,CNOT6,ATF7IP2,AKNA	0.262279	biological_process	1117
epithelial cell differentiation	Group	48	48	2	4	VEGFA,F11R	0.269239	biological_process	1118
blood circulation	Group	48	48	2	4	MTHFR,EPB41	0.269239	biological_process	1119
receptor clustering	Group	15	15	1	6	AGRN	0.273986	biological_process	1120
negative regulation of insulin receptor signaling pathway	Group	15	15	1	6	PRKCA	0.273986	biological_process	1121
negative regulation of smooth muscle cell proliferation	Group	15	15	1	6	COMT	0.273986	biological_process	1122
gene silencing by RNA	Group	15	15	1	6	EIF2C4	0.273986	biological_process	1123
positive regulation of neurogenesis	Group	15	15	1	6	SERPINF1	0.273986	biological_process	1124
complement activation, alternative pathway	Group	15	15	1	6	CFH	0.273986	biological_process	1125
B cell receptor signaling pathway	Group	15	15	1	6	PTPRC	0.273986	biological_process	1126
regulation of actin cytoskeleton organization	Group	15	15	1	6	RHOQ	0.273986	biological_process	1127
lipopolysaccharide-mediated signaling pathway	Group	15	15	1	6	MAPK14	0.273986	biological_process	1128
insulin-like growth factor receptor signaling pathway	Group	15	15	1	6	IGF1R	0.273986	biological_process	1129
retinol metabolic process	Group	15	15	1	6	RETSAT	0.273986	biological_process	1130
negative regulation of hydrolase activity	Group	15	15	1	6	LEPR	0.273986	biological_process	1131
mitotic spindle organization	Group	15	15	1	6	TNKS	0.273986	biological_process	1132
vesicle organization	Group	15	15	1	6	SORT1	0.273986	biological_process	1133
drug metabolic process	Group	15	15	1	6	EPHX2	0.273986	biological_process	1134
prostaglandin biosynthetic process	Group	15	15	1	6	PTGS1	0.273986	biological_process	1135
chaperone mediated protein folding requiring cofactor	Group	15	15	1	6	ERO1L	0.273986	biological_process	1136
response to molecule of bacterial origin	Group	15	15	1	6	B2M	0.273986	biological_process	1137
response to arsenic	Group	15	15	1	6	CPOX	0.273986	biological_process	1138
male gonad development	Group	49	49	2	4	BCL2,NCOA4	0.277094	biological_process	1139
regulation of cell migration	Group	50	50	2	4	RTN4,LAMA5	0.284944	biological_process	1140
glucose homeostasis	Group	50	50	2	4	PTCH1,PYGL	0.284944	biological_process	1141
negative regulation of osteoclast differentiation	Group	16	16	1	6	NF1	0.289323	biological_process	1142
positive regulation of T cell differentiation	Group	16	16	1	6	PTPRC	0.289323	biological_process	1143
regulation of MAPKKK cascade	Group	16	16	1	6	ATP6AP2	0.289323	biological_process	1144
activation of protein kinase activity	Group	16	16	1	6	ACVR2B	0.289323	biological_process	1145
activation of NF-kappaB-inducing kinase activity	Group	16	16	1	6	TNFRSF10B	0.289323	biological_process	1146
cell volume homeostasis	Group	16	16	1	6	KCNN4	0.289323	biological_process	1147
mast cell activation	Group	16	16	1	6	NDRG1	0.289323	biological_process	1148
glycogen biosynthetic process	Group	16	16	1	6	GYG2	0.289323	biological_process	1149
embryonic forelimb morphogenesis	Group	16	16	1	6	LRP6	0.289323	biological_process	1150
female gonad development	Group	16	16	1	6	IDH1	0.289323	biological_process	1151
cardiac muscle tissue development	Group	16	16	1	6	HSPG2	0.289323	biological_process	1152
male sex determination	Group	16	16	1	6	IGF1R	0.289323	biological_process	1153
response to acid	Group	16	16	1	6	BCL2	0.289323	biological_process	1154
positive regulation of transcription from RNA polymerase II promoter	Group	382	382	10	2	PRDM9,VEGFA,MAPK14,SOX5,AGRN,THRB,ZMIZ1,NFIA,ZBTB38,TCEA1	0.289469	biological_process	1155
Rho protein signal transduction	Group	51	51	2	3	BCL6,KIFAP3	0.292786	biological_process	1156
synaptic transmission	Group	214	214	6	2	SYT1,GABRG1,AGRN,KIF5A,CLSTN1,CLSTN3	0.299001	biological_process	1157
chromatin remodeling	Group	52	52	2	3	BNIP3,SMARCC2	0.300615	biological_process	1158
axonogenesis	Group	91	91	3	3	ERBB3,BCL2,IGF1R	0.301777	biological_process	1159
regulation of angiogenesis	Group	17	17	1	5	NF1	0.304337	biological_process	1160
regulation of metabolic process	Group	17	17	1	5	LEPR	0.304337	biological_process	1161
negative regulation of transport	Group	17	17	1	5	ARL6IP5	0.304337	biological_process	1162
negative regulation of specific transcription from RNA polymerase II promoter	Group	17	17	1	5	BCOR	0.304337	biological_process	1163
negative regulation of secretion	Group	17	17	1	5	ERBB3	0.304337	biological_process	1164
induction of apoptosis via death domain receptors	Group	17	17	1	5	TNFRSF10B	0.304337	biological_process	1165
complement activation	Group	17	17	1	5	CFH	0.304337	biological_process	1166
positive regulation of vasodilation	Group	17	17	1	5	EPHX2	0.304337	biological_process	1167
regulation of heart rate	Group	17	17	1	5	SEMA3A	0.304337	biological_process	1168
muscle maintenance	Group	17	17	1	5	DMD	0.304337	biological_process	1169
telomere maintenance via telomerase	Group	17	17	1	5	MRE11A	0.304337	biological_process	1170
T cell homeostasis	Group	17	17	1	5	BCL2	0.304337	biological_process	1171
B cell homeostasis	Group	17	17	1	5	BCL2	0.304337	biological_process	1172
vasoconstriction	Group	17	17	1	5	P2RX1	0.304337	biological_process	1173
B cell proliferation	Group	17	17	1	5	BCL2	0.304337	biological_process	1174
cell morphogenesis involved in differentiation	Group	17	17	1	5	RELN	0.304337	biological_process	1175
preassembly of GPI anchor in ER membrane	Group	17	17	1	5	PIGN	0.304337	biological_process	1176
long-chain fatty acid metabolic process	Group	17	17	1	5	CD36	0.304337	biological_process	1177
nucleotide-excision repair, DNA gap filling	Group	17	17	1	5	POLD4	0.304337	biological_process	1178
endocrine pancreas development	Group	17	17	1	5	MNX1	0.304337	biological_process	1179
ovulation from ovarian follicle	Group	17	17	1	5	LEPR	0.304337	biological_process	1180
reproductive process in a multicellular organism	Group	17	17	1	5	COMT	0.304337	biological_process	1181
oogenesis	Group	17	17	1	5	HEXB	0.304337	biological_process	1182
negative regulation of endothelial cell proliferation	Group	18	18	1	5	NF1	0.319034	biological_process	1183
regulation of mitosis	Group	18	18	1	5	CDC25C	0.319034	biological_process	1184
tissue homeostasis	Group	18	18	1	5	ITGB1	0.319034	biological_process	1185
body fluid secretion	Group	18	18	1	5	SLC22A4	0.319034	biological_process	1186
retinoic acid metabolic process	Group	18	18	1	5	SCPEP1	0.319034	biological_process	1187
peptide hormone processing	Group	18	18	1	5	ECE1	0.319034	biological_process	1188
endothelial cell migration	Group	18	18	1	5	S100P	0.319034	biological_process	1189
eye photoreceptor cell development	Group	18	18	1	5	VEGFA	0.319034	biological_process	1190
bile acid metabolic process	Group	18	18	1	5	NPC1	0.319034	biological_process	1191
arachidonic acid metabolic process	Group	18	18	1	5	FADS1	0.319034	biological_process	1192
midbrain development	Group	18	18	1	5	APLP2	0.319034	biological_process	1193
endochondral ossification	Group	18	18	1	5	HSPG2	0.319034	biological_process	1194
neutral amino acid transport	Group	18	18	1	5	SLC43A1	0.319034	biological_process	1195
sulfate transport	Group	18	18	1	5	SLC26A2	0.319034	biological_process	1196
respiratory burst	Group	18	18	1	5	CD55	0.319034	biological_process	1197
viral genome replication	Group	18	18	1	5	NFIA	0.319034	biological_process	1198
acute inflammatory response	Group	18	18	1	5	B4GALT1	0.319034	biological_process	1199
protein catabolic process	Group	56	56	2	3	CAST,PPT1	0.331758	biological_process	1200
sarcomere organization	Group	19	19	1	5	ITGB1	0.333422	biological_process	1201
DNA damage response, signal transduction by p53 class mediator resulting in induction of apoptosis	Group	19	19	1	5	BBC3	0.333422	biological_process	1202
positive regulation of vasoconstriction	Group	19	19	1	5	PTGS1	0.333422	biological_process	1203
regulation of cellular metabolic process	Group	19	19	1	5	HEXB	0.333422	biological_process	1204
nitric oxide mediated signal transduction	Group	19	19	1	5	CD36	0.333422	biological_process	1205
regulation of inflammatory response	Group	19	19	1	5	BCL6	0.333422	biological_process	1206
positive regulation of blood pressure	Group	19	19	1	5	EPHX2	0.333422	biological_process	1207
histone deacetylation	Group	19	19	1	5	HDAC9	0.333422	biological_process	1208
peptidyl-amino acid modification	Group	19	19	1	5	ASPH	0.333422	biological_process	1209
lymph node development	Group	19	19	1	5	ID2	0.333422	biological_process	1210
behavioral fear response	Group	19	19	1	5	BCL2	0.333422	biological_process	1211
response to pH	Group	19	19	1	5	PAM	0.333422	biological_process	1212
response to nutrient levels	Group	19	19	1	5	MAP1B	0.333422	biological_process	1213
response to calcium ion	Group	57	57	2	3	ADAM9,TXNIP	0.339486	biological_process	1214
protein ubiquitination	Group	98	98	3	3	FBXO25,UBE2H,MIB1	0.34226	biological_process	1215
central nervous system development	Group	140	140	4	2	SERPINI1,RELN,MAP1B,PAM	0.342759	biological_process	1216
negative regulation of microtubule depolymerization	Group	20	20	1	5	MAP1B	0.347506	biological_process	1217
positive regulation of hormone secretion	Group	20	20	1	5	NMU	0.347506	biological_process	1218
cellular response to extracellular stimulus	Group	20	20	1	5	AXL	0.347506	biological_process	1219
axon regeneration	Group	20	20	1	5	BCL2	0.347506	biological_process	1220
auditory receptor cell differentiation	Group	20	20	1	5	CUX1	0.347506	biological_process	1221
intra-Golgi vesicle-mediated transport	Group	20	20	1	5	CUX1	0.347506	biological_process	1222
phospholipid catabolic process	Group	20	20	1	5	PLD1	0.347506	biological_process	1223
female pregnancy	Group	100	100	3	3	BCL2,LEPR,COMT	0.35381	biological_process	1224
DNA metabolic process	Group	59	59	2	3	DNASE2,MRE11A	0.354857	biological_process	1225
negative regulation of proteolysis	Group	21	21	1	4	CLN8	0.361292	biological_process	1226
release of sequestered calcium ion into cytosol	Group	21	21	1	4	PTPRC	0.361292	biological_process	1227
positive regulation of synaptic transmission	Group	21	21	1	4	NMU	0.361292	biological_process	1228
cell cycle checkpoint	Group	21	21	1	4	MRE11A	0.361292	biological_process	1229
DNA damage checkpoint	Group	21	21	1	4	MAPK14	0.361292	biological_process	1230
DNA methylation	Group	21	21	1	4	ATRX	0.361292	biological_process	1231
Golgi organization	Group	21	21	1	4	OPTN	0.361292	biological_process	1232
blastocyst development	Group	21	21	1	4	TGFBR3	0.361292	biological_process	1233
morphogenesis of an epithelium	Group	21	21	1	4	FGFR3	0.361292	biological_process	1234
cell-cell signaling	Group	275	275	7	2	FAT,CD80,ADAM10,FGFR3,FADS1,BST2,KLF10	0.362126	biological_process	1235
response to heat	Group	60	60	2	3	BCL2,PKLR	0.362495	biological_process	1236
regulation of Rab GTPase activity	Group	61	61	2	3	GRTP1,RABGAP1L	0.370099	biological_process	1237
positive regulation of cell cycle	Group	22	22	1	4	ID2	0.374788	biological_process	1238
induction of apoptosis by intracellular signals	Group	22	22	1	4	PRKCA	0.374788	biological_process	1239
G2-M transition of mitotic cell cycle	Group	22	22	1	4	TPD52L1	0.374788	biological_process	1240
calcium ion-dependent exocytosis	Group	22	22	1	4	SYT1	0.374788	biological_process	1241
glycerol metabolic process	Group	22	22	1	4	GDPD1	0.374788	biological_process	1242
proteolysis involved in cellular protein catabolic process	Group	22	22	1	4	LONP1	0.374788	biological_process	1243
retina development in camera-type eye	Group	22	22	1	4	CLN8	0.374788	biological_process	1244
embryonic hindlimb morphogenesis	Group	22	22	1	4	LRP6	0.374788	biological_process	1245
morphogenesis of embryonic epithelium	Group	22	22	1	4	LAMA5	0.374788	biological_process	1246
blood vessel morphogenesis	Group	22	22	1	4	VEGFA	0.374788	biological_process	1247
bone mineralization	Group	22	22	1	4	KLF10	0.374788	biological_process	1248
social behavior	Group	22	22	1	4	CLN8	0.374788	biological_process	1249
defense response to Gram-positive bacterium	Group	22	22	1	4	PLD1	0.374788	biological_process	1250
neurological system process	Group	22	22	1	4	GPR98	0.374788	biological_process	1251
response to light stimulus	Group	22	22	1	4	FECH	0.374788	biological_process	1252
response to reactive oxygen species	Group	22	22	1	4	PRKCA	0.374788	biological_process	1253
neuron differentiation	Group	104	104	3	2	PCSK9,MNX1,PTPRR	0.376824	biological_process	1254
ATP synthesis coupled proton transport	Group	62	62	2	3	ATP6V1E2,ATP6AP1	0.377667	biological_process	1255
spermatid development	Group	63	63	2	3	CEP57,SPAG6	0.385196	biological_process	1256
sodium ion transport	Group	149	149	4	2	ATP1A1,SCN9A,SLC22A4,SLC38A1	0.385862	biological_process	1257
negative regulation of caspase activity	Group	23	23	1	4	HSPA5	0.387999	biological_process	1258
regulation of exocytosis	Group	23	23	1	4	SYT1	0.387999	biological_process	1259
gamma-aminobutyric acid signaling pathway	Group	23	23	1	4	GABRG1	0.387999	biological_process	1260
cAMP-mediated signaling	Group	23	23	1	4	EIF4EBP2	0.387999	biological_process	1261
regulation of pH	Group	23	23	1	4	CLCN3	0.387999	biological_process	1262
neuromuscular junction development	Group	23	23	1	4	AGRN	0.387999	biological_process	1263
vesicle docking during exocytosis	Group	23	23	1	4	EXOC4	0.387999	biological_process	1264
cellular aromatic compound metabolic process	Group	23	23	1	4	CLYBL	0.387999	biological_process	1265
pigmentation during development	Group	23	23	1	4	BCL2	0.387999	biological_process	1266
embryonic placenta development	Group	23	23	1	4	EGLN1	0.387999	biological_process	1267
response to external stimulus	Group	23	23	1	4	BCL2	0.387999	biological_process	1268
response to cadmium ion	Group	23	23	1	4	NPC1	0.387999	biological_process	1269
pattern specification process	Group	64	64	2	3	ACVR2B,ASPH	0.392685	biological_process	1270
elevation of cytosolic calcium ion concentration	Group	107	107	3	2	CD55,ITGAV,ITPR1	0.393975	biological_process	1271
embryonic limb morphogenesis	Group	65	65	2	3	PTCH1,CHST11	0.400133	biological_process	1272
patterning of blood vessels	Group	24	24	1	4	VEGFA	0.400932	biological_process	1273
cilium assembly	Group	24	24	1	4	LAMA5	0.400932	biological_process	1274
regulation of lipid metabolic process	Group	24	24	1	4	THRB	0.400932	biological_process	1275
neural crest cell migration	Group	24	24	1	4	LAMA5	0.400932	biological_process	1276
binding of sperm to zona pellucida	Group	24	24	1	4	B4GALT1	0.400932	biological_process	1277
nucleotide biosynthetic process	Group	24	24	1	4	PRPSAP1	0.400932	biological_process	1278
thymus development	Group	24	24	1	4	BCL2	0.400932	biological_process	1279
response to virus	Group	110	110	3	2	IFNGR1,APOBEC3G,XPR1	0.411	biological_process	1280
synaptic vesicle exocytosis	Group	25	25	1	4	SYT1	0.413592	biological_process	1281
leukocyte migration	Group	25	25	1	4	B4GALT1	0.413592	biological_process	1282
carboxylic acid metabolic process	Group	25	25	1	4	CSAD	0.413592	biological_process	1283
response to osmotic stress	Group	25	25	1	4	SLC2A1	0.413592	biological_process	1284
response to ionizing radiation	Group	25	25	1	4	CYP2R1	0.413592	biological_process	1285
response to amino acid stimulus	Group	25	25	1	4	AARS	0.413592	biological_process	1286
response to hormone stimulus	Group	68	68	2	2	NCOA4,LONP1	0.422211	biological_process	1287
barbed-end actin filament capping	Group	26	26	1	3	SPTBN1	0.425984	biological_process	1288
positive regulation of cell adhesion	Group	26	26	1	3	TGM2	0.425984	biological_process	1289
positive regulation of cell-substrate adhesion	Group	26	26	1	3	HSD17B12	0.425984	biological_process	1290
negative regulation of T cell proliferation	Group	26	26	1	3	IL20RB	0.425984	biological_process	1291
positive regulation of fibroblast proliferation	Group	26	26	1	3	ZMIZ1	0.425984	biological_process	1292
regulation of neurotransmitter secretion	Group	26	26	1	3	ICA1	0.425984	biological_process	1293
T cell proliferation	Group	26	26	1	3	PTPRC	0.425984	biological_process	1294
reciprocal meiotic recombination	Group	26	26	1	3	MRE11A	0.425984	biological_process	1295
proteasomal ubiquitin-dependent protein catabolic process	Group	26	26	1	3	PPP2R5C	0.425984	biological_process	1296
cerebral cortex development	Group	26	26	1	3	NF1	0.425984	biological_process	1297
proton transport	Group	69	69	2	2	ATP6V1E2,ATP6AP1	0.429478	biological_process	1298
digestion	Group	69	69	2	2	ACSL1,NMU	0.429478	biological_process	1299
anatomical structure morphogenesis	Group	159	159	4	2	FAT,NFE2L1,MNX1,CLTCL1	0.433301	biological_process	1300
calcium-independent cell-cell adhesion	Group	27	27	1	3	CLDN12	0.438115	biological_process	1301
heterophilic cell adhesion	Group	27	27	1	3	AMIGO2	0.438115	biological_process	1302
T cell receptor signaling pathway	Group	27	27	1	3	PTPRC	0.438115	biological_process	1303
regulation of synaptic transmission	Group	27	27	1	3	PXK	0.438115	biological_process	1304
regulation of neuronal synaptic plasticity	Group	27	27	1	3	BHLHB2	0.438115	biological_process	1305
activation of MAPKK activity	Group	27	27	1	3	ADAM9	0.438115	biological_process	1306
establishment or maintenance of cell polarity	Group	27	27	1	3	FAT	0.438115	biological_process	1307
glial cell differentiation	Group	27	27	1	3	RELN	0.438115	biological_process	1308
ATP metabolic process	Group	27	27	1	3	ATP7A	0.438115	biological_process	1309
cardiac muscle contraction	Group	27	27	1	3	TNNI3	0.438115	biological_process	1310
response to radiation	Group	27	27	1	3	BCL2	0.438115	biological_process	1311
response to progesterone stimulus	Group	27	27	1	3	TXNIP	0.438115	biological_process	1312
mRNA transport	Group	71	71	2	2	TNKS,NUP210	0.443863	biological_process	1313
positive regulation of phagocytosis	Group	28	28	1	3	PROS1	0.44999	biological_process	1314
B cell activation	Group	28	28	1	3	BST2	0.44999	biological_process	1315
neutrophil chemotaxis	Group	28	28	1	3	PRKCA	0.44999	biological_process	1316
nucleoside metabolic process	Group	28	28	1	3	PRPSAP1	0.44999	biological_process	1317
heart looping	Group	28	28	1	3	MIB1	0.44999	biological_process	1318
endoderm development	Group	28	28	1	3	LAMC1	0.44999	biological_process	1319
biosynthetic process	Group	72	72	2	2	ALAS2,GCAT	0.45098	biological_process	1320
regulation of transcription, DNA-dependent	Group	2501	2501	54	2	PNRC1,ZNF277,PRDM9,BBX,RFX7,HMBOX1,ZNF276,FRYL,ZNF429,NFE2L1,HOXB3,TXNIP,NFATC1,KLF9,BCL6,ATRX,FOXP1,BCOR,BACH2,EZH2,SOX5,CUX1,MNX1,LITAF,MYCL1,ATF6,TLE2,ARID3B,BHLHB2,RB1CC1,CTCFL,RYBP,HDAC9,KLF10,THRB,GRHL1,TBL1XR1,SMARCC2,RBAK,ZMIZ1,ATF5,NFIA,TBL1X,ZNF33B,CREB3L2,CREG1,PARP14,IRF2BP2,MLXIP,ZBTB38,TCEA1,CNOT6,ATF7IP2,AKNA	0.452268	biological_process	1321
negative regulation of inflammatory response	Group	29	29	1	3	SERPINF1	0.461615	biological_process	1322
regulation of long-term neuronal synaptic plasticity	Group	29	29	1	3	NF1	0.461615	biological_process	1323
cytolysis	Group	29	29	1	3	APOL1	0.461615	biological_process	1324
phosphate metabolic process	Group	29	29	1	3	ENPP3	0.461615	biological_process	1325
protein kinase cascade	Group	120	120	3	2	MAPK14,DAPK1,TGFBR3	0.466536	biological_process	1326
cell motion	Group	120	120	3	2	MAPK14,LSP1,AMFR	0.466536	biological_process	1327
microtubule-based movement	Group	120	120	3	2	TUBB2B,KIF5A,TUBA1A	0.466536	biological_process	1328
visual perception	Group	213	213	5	2	COL18A1,PPT1,GPR98,CLN8,TBL1X	0.468744	biological_process	1329
spermatogenesis	Group	353	353	8	2	C17orf75,SLC2A14,SPAG6,BCL6,HAGH,CELSR2,SPAG4,SLCO4C1	0.469629	biological_process	1330
transcription from RNA polymerase II promoter	Group	167	167	4	2	BMPR2,NFE2L1,NFATC1,SOX5	0.470516	biological_process	1331
double-strand break repair	Group	30	30	1	3	MRE11A	0.472994	biological_process	1332
nitrogen compound metabolic process	Group	30	30	1	3	CORO2A	0.472994	biological_process	1333
DNA replication	Group	168	168	4	2	POLD4,CDC25C,FHIT,NFIA	0.475107	biological_process	1334
meiosis	Group	76	76	2	2	PRDM9,MRE11A	0.478918	biological_process	1335
positive regulation of angiogenesis	Group	31	31	1	3	ERAP1	0.484134	biological_process	1336
positive regulation of neuron differentiation	Group	31	31	1	3	MAP1B	0.484134	biological_process	1337
activation of adenylate cyclase activity	Group	31	31	1	3	NTRK1	0.484134	biological_process	1338
cellular process	Group	77	77	2	2	AMFR,PAM	0.485766	biological_process	1339
cell division	Group	266	266	6	2	CDC2L6,CDC25C,CCNG1,NEK3,PPP1CB,SEPT6	0.492516	biological_process	1340
response to estrogen stimulus	Group	78	78	2	2	BCL2,LEPR	0.492557	biological_process	1341
positive regulation of DNA replication	Group	32	32	1	3	IGF1R	0.495038	biological_process	1342
platelet activation	Group	32	32	1	3	P2RX1	0.495038	biological_process	1343
cell fate specification	Group	32	32	1	3	ITGB1	0.495038	biological_process	1344
acyl-CoA metabolic process	Group	32	32	1	3	HMGCL	0.495038	biological_process	1345
placenta development	Group	32	32	1	3	IL11RA	0.495038	biological_process	1346
cellular protein complex assembly	Group	33	33	1	3	LONP1	0.505712	biological_process	1347
calcium-dependent cell-cell adhesion	Group	33	33	1	3	ATP2C1	0.505712	biological_process	1348
positive regulation of multicellular organism growth	Group	33	33	1	3	BCL2	0.505712	biological_process	1349
gluconeogenesis	Group	33	33	1	3	PCK2	0.505712	biological_process	1350
cytokine-mediated signaling pathway	Group	80	80	2	2	LIFR,IL11RA	0.505968	biological_process	1351
hemopoiesis	Group	80	80	2	2	BCL2,PICALM	0.505968	biological_process	1352
negative regulation of Wnt receptor signaling pathway	Group	34	34	1	2	LRP6	0.51616	biological_process	1353
positive regulation of anti-apoptosis	Group	34	34	1	2	LIFR	0.51616	biological_process	1354
epidermal growth factor receptor signaling pathway	Group	34	34	1	2	ADAM17	0.51616	biological_process	1355
regulation of multicellular organism growth	Group	34	34	1	2	ATRN	0.51616	biological_process	1356
phosphorylation	Group	34	34	1	2	ADRBK2	0.51616	biological_process	1357
protein heterooligomerization	Group	82	82	2	2	IGF1R,P2RX1	0.519147	biological_process	1358
forebrain development	Group	82	82	2	2	FGFR3,APLP2	0.519147	biological_process	1359
potassium ion transport	Group	179	179	4	2	KCNN4,ATP1A1,KCNE3,KCNK1	0.524514	biological_process	1360
regulation of cell growth	Group	83	83	2	2	CD44,DDR1	0.525648	biological_process	1361
smoothened signaling pathway	Group	35	35	1	2	PTCH1	0.526389	biological_process	1362
telomere maintenance	Group	35	35	1	2	MRE11A	0.526389	biological_process	1363
dendrite development	Group	35	35	1	2	MAP1B	0.526389	biological_process	1364
fat cell differentiation	Group	35	35	1	2	ERAP1	0.526389	biological_process	1365
neural tube closure	Group	36	36	1	2	FZD3	0.536401	biological_process	1366
RNA metabolic process	Group	36	36	1	2	MIF4GD	0.536401	biological_process	1367
somitogenesis	Group	36	36	1	2	MIB1	0.536401	biological_process	1368
androgen receptor signaling pathway	Group	37	37	1	2	NCOA4	0.546202	biological_process	1369
regulation of synaptic plasticity	Group	38	38	1	2	PPT1	0.555796	biological_process	1370
regulation of translational initiation	Group	38	38	1	2	EIF4EBP2	0.555796	biological_process	1371
insulin secretion	Group	38	38	1	2	ACVR2B	0.555796	biological_process	1372
antigen processing and presentation	Group	88	88	2	2	ERAP1,MR1	0.55725	biological_process	1373
nucleobase, nucleoside, nucleotide and nucleic acid metabolic process	Group	89	89	2	2	PRPSAP1,FLJ20433	0.563389	biological_process	1374
nucleosome assembly	Group	139	139	3	2	HIST1H2BD,HIST3H2A,HIST1H1C	0.564871	biological_process	1375
positive regulation of specific transcription from RNA polymerase II promoter	Group	39	39	1	2	RHOQ	0.565188	biological_process	1376
cytokinesis	Group	39	39	1	2	2013-09-06	0.565188	biological_process	1377
heart morphogenesis	Group	39	39	1	2	ZMIZ1	0.565188	biological_process	1378
negative regulation of neuron differentiation	Group	40	40	1	2	MIB1	0.574382	biological_process	1379
one-carbon compound metabolic process	Group	40	40	1	2	SHMT2	0.574382	biological_process	1380
regulation of G-protein coupled receptor protein signaling pathway	Group	41	41	1	2	ITGB1	0.583381	biological_process	1381
positive regulation of transcription, DNA-dependent	Group	144	144	3	2	NCOA4,SMARCC2,TCEA1	0.58885	biological_process	1382
muscle contraction	Group	95	95	2	2	TRDN,ASPH	0.598927	biological_process	1383
JAK-STAT cascade	Group	43	43	1	2	FGFR3	0.600814	biological_process	1384
memory	Group	43	43	1	2	PLCB1	0.600814	biological_process	1385
ER to Golgi vesicle-mediated transport	Group	44	44	1	2	LMAN1	0.609255	biological_process	1386
modification-dependent protein catabolic process	Group	501	501	10	1	RNF144A,FBXO25,FBXL20,FBXL13,AMFR,UBE2H,TBL1XR1,MIB1,TBL1X,DZIP3	0.615634	biological_process	1387
calcium-mediated signaling	Group	45	45	1	2	NUDT4	0.617518	biological_process	1388
protein import into nucleus	Group	45	45	1	2	PDIA3	0.617518	biological_process	1389
autophagy	Group	46	46	1	2	LAMP1	0.625607	biological_process	1391
nucleotide metabolic process	Group	46	46	1	2	FHIT	0.625607	biological_process	1392
muscle organ development	Group	100	100	2	2	DMD,LAMA5	0.626846	biological_process	1393
phosphoinositide-mediated signaling	Group	47	47	1	2	IGF1R	0.633525	biological_process	1394
excretion	Group	47	47	1	2	CLCN5	0.633525	biological_process	1395
regulation of cell differentiation	Group	48	48	1	2	FADS1	0.641276	biological_process	1396
activation of phospholipase C activity by G-protein coupled receptor protein signaling pathway coupled to IP3 second messenger	Group	48	48	1	2	TGM2	0.641276	biological_process	1397
intracellular transport	Group	48	48	1	2	NUDT4	0.641276	biological_process	1398
determination of left-right symmetry	Group	48	48	1	2	ACVR2B	0.641276	biological_process	1399
JNK cascade	Group	49	49	1	2	RB1CC1	0.648863	biological_process	1400
circadian rhythm	Group	49	49	1	2	ERBB3	0.648863	biological_process	1401
cell cycle process	Group	50	50	1	2	PHGDH	0.65629	biological_process	1402
translational initiation	Group	51	51	1	1	EIF4E3	0.66356	biological_process	1403
xenobiotic metabolic process	Group	52	52	1	1	EPHX2	0.670677	biological_process	1404
dorsal-ventral pattern formation	Group	53	53	1	1	PTCH1	0.677643	biological_process	1405
cell cycle arrest	Group	115	115	2	1	CDKN1C,TP53INP1	0.701516	biological_process	1406
glucose metabolic process	Group	115	115	2	1	MAPK14,PDK1	0.701516	biological_process	1407
neurotransmitter transport	Group	58	58	1	1	ICA1	0.710329	biological_process	1408
electron transport chain	Group	118	118	2	1	FADS1,ERO1L	0.714869	biological_process	1409
response to retinoic acid	Group	60	60	1	1	PTCH1	0.722457	biological_process	1410
response to DNA damage stimulus	Group	236	236	4	1	A730011L01Rik,BCL6,ATRX,MRE11A	0.736736	biological_process	1411
inner ear morphogenesis	Group	64	64	1	1	FZD3	0.745213	biological_process	1412
chromatin assembly or disassembly	Group	65	65	1	1	SMARCC2	0.750605	biological_process	1413
sperm motility	Group	127	127	2	1	ATP1A1,SPAG6	0.751944	biological_process	1414
regulation of signal transduction	Group	66	66	1	1	SPRED1	0.755883	biological_process	1415
cell fate commitment	Group	66	66	1	1	SOX5	0.755883	biological_process	1416
defense response	Group	188	188	3	1	C6orf26,KCNN4,LSP1	0.761487	biological_process	1417
DNA recombination	Group	69	69	1	1	ATRX	0.771057	biological_process	1418
tRNA aminoacylation for protein translation	Group	70	70	1	1	WARS	0.775903	biological_process	1419
regulation of protein metabolic process	Group	71	71	1	1	UBE2H	0.780647	biological_process	1420
ubiquitin-dependent protein catabolic process	Group	196	196	3	1	AMFR,UBE2H,PAN2	0.785604	biological_process	1421
activation of MAPK activity	Group	73	73	1	1	PTPRC	0.789835	biological_process	1422
negative regulation of signal transduction	Group	74	74	1	1	ERBB3	0.794284	biological_process	1423
neuron migration	Group	74	74	1	1	RELN	0.794284	biological_process	1424
tRNA processing	Group	76	76	1	1	TSEN15	0.802902	biological_process	1425
immune response	Group	604	604	10	1	RGD1562317,CTSC,IGF1R,CFH,B2M,ERAP1,TGFBR3,MR1,CD96,C1RL	0.822969	biological_process	1426
signal transduction	Group	2809	2809	53	1	ARHGAP19,OR52B2,OR2AT4,OR51T1,IGF1R,IGF2R,LEPR,GRN,PDIA3,P2RX1,ACVR1B,MAP2K5,PTCH1,DAPK1,GAS6,IQGAP1,AKAP12,AXL,ITPR1,FER,NF1,TGFBR3,FZD5,NMU,SERPINB9,LSP1,IFNGR1,SH2D2A,ATF6,OPTN,TLE2,AMFR,ADRBK2,CD53,ACVR2B,GPR98,AGRN,PLCB1,KIFAP3,RGL2,OGT,PPP2R5C,APPL1,FLNB,PLXNB2,ANXA3,PDK1,EXT2,TBL1X,PRKAB2,FZD3,CELSR2,RTN2	0.826458	biological_process	1427
mitosis	Group	213	213	3	1	CDC25C,CCNG1,NEK3	0.830171	biological_process	1428
positive regulation of transcription	Group	153	153	2	1	CD80,NFIA	0.836528	biological_process	1429
RNA processing	Group	93	93	1	1	DDX17	0.863022	biological_process	1430
post-translational protein modification	Group	95	95	1	1	UBE2H	0.868764	biological_process	1431
cytoskeleton organization	Group	102	102	1	0	LSP1	0.887034	biological_process	1432
DNA repair	Group	251	251	3	1	A730011L01Rik,ATRX,MRE11A	0.901895	biological_process	1433
nuclear mRNA splicing, via spliceosome	Group	128	128	1	0	PCBP2	0.935288	biological_process	1434
translational elongation	Group	161	161	1	0	RPL37	0.968117	biological_process	1435
mRNA processing	Group	277	277	2	0	CUGBP2,TSEN15	0.981497	biological_process	1436
RNA splicing	Group	238	238	1	0	RRAGC	0.993908	biological_process	1437
translation	Group	635	635	5	0	WARS,EIF2C4,EIF4E3,RPL37,AARS	0.99761	biological_process	1438
response to stimulus	Group	724	724	6	0	OR52B2,OR2AT4,OR51T1,P2RX1,PPT1,GPR98	0.998076	biological_process	1439
sensory perception of smell	Group	1226	1226	4	0	OR52B2,OR2AT4,OR51T1,NCAM2	1	biological_process	1440
detection of chemical stimulus involved in sensory perception of smell	Group	1138	1138	2	0	OR52B2,OR2AT4	1	biological_process	1441
G-protein coupled receptor protein signaling pathway	Group	2761	2761	12	0	KIAA1324L,OR52B2,OR2AT4,OR51T1,TGM2,AKAP12,FZD5,GPR98,APLP2,FZD3,XPR1,CELSR2	1	biological_process	1442
